# Supplementary material
Source: publisher site journal article supplement (https://www.degruyterbrill.com/publication/isbn/9783111336107/downloadAsset/9783111336107_L%C3%B6sungen.zip)
Supplement: Supplementary file 1 [file Lsungen_Kapitel 2.pdf › Lsungen_Kapitel 2.pdf]

# Lösungen der Übungsaufgaben in Diskrete Mathematik kompakt (Bernd Baumgarten, De Gruyter, 2024) – Kapitel 2: Mengen –

Bitte beachten Sie:

- Versuchen Sie stets, die Aufgabe zunächst selbst zu lösen! Das Anschauen einer gelösten Übungsaufgabe *ohne vorherigen eigenen ernsthaften Bearbeitungsversuch* nützt Ihnen hinsichtlich des Lernerfolgs oft nicht mehr als der Genuss einer Tasse Kaffee: Es erzeugt einfach nur vorübergehend ein angenehmes Gefühl, hinterlässt aber keinen bleibenden Effekt.
- Zu jeder Aufgabe kann es verschiedene korrekte Lösungen bzw. Lösungswege und für jede Lösung mehrere Schreibweisen geben. Daher sind die in der Folge vorgestellten Lösungen durchweg nur als Beispiele zu verstehen.
- Zusätzliche Erklärungen stehen in eckigen Klammern [ ... ].
- Auch in Übungsaufgaben können Fehler stecken. Bitte beachten Sie die eventuelle Korrigenda-Datei des Verlages.

## 2.1 Mengenbeschreibung durch Aufzählung und Eigenschaften

- a.i)  $\{3, 5, 7\}$   
a.ii)  $\{3, 5, 7\}$   
a.iii)  $\{3, 5, 7\}$  [Die Lösungen  $x$  von  $0 = x^3 - 4x = x \cdot (x - 2)(x + 2)$  sind 0, 2 und  $-2$ .]  
b.i)  $\{n \mid n \text{ ist gerade Zahl und } 0 < n < 10\}$   
b.ii)  $\{n \mid n \in \mathbb{N} \text{ und } n \leq 5\}$   
b.iii)  $\{n \mid n \in \mathbb{N}, n < 10, \text{ und } n \text{ ist nicht Primzahl}\}$

## 2.2 Barbier-Paradoxon oder nicht?

Herr Maier wohnt nicht in der Stadt, in der Ihr Freund wohnt.

[Würde er dort wohnen, würde er sich selbst rasieren und sich selbst nicht rasieren. Das ist unmöglich.]

## 2.3 Mengendefinitionen und Mengenoperationen

- a) wahr:  $S \subseteq G, \quad G \cap D = S, \quad S = \{m \cdot n \mid m \in G, n \in D\}$   
[  $S \subseteq \{m \cdot n \mid m \in G, n \in D\}$ , denn  $6 \cdot x = (2 \cdot x) \cdot (3 \cdot 1)$ ;  
 $\{m \cdot n \mid m \in G, n \in D\} \subseteq S$ , denn  $(2 \cdot x) \cdot (3 \cdot y) = 6 \cdot (x \cdot y)$ . ]  
falsch:  $G \subseteq V$  [denn  $2 \notin V$ ],  $V = \{m + n \mid m, n \in G\}$  [denn  $2 + 4 \notin V$ ]  
b)  $V \cap G = V, \quad S \cup G = G, \quad \{m + n \mid m, n \in G\} \cup \{2\} = G.$

## 2.4 Mengendiagramme und Mengenoperationen

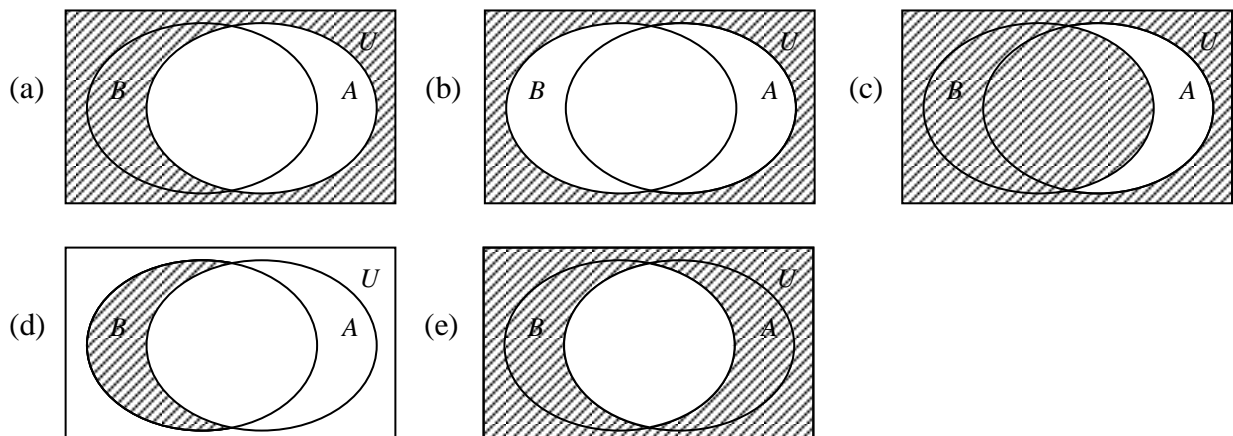

## 2.5 Eine weitere Mengenoperation

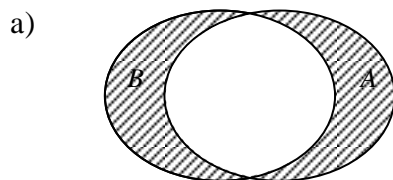

- b) (i)  $B = \emptyset$  (ii)  $A = B$  (iii)  $A \cup B = C$  und  $A \cap B = \emptyset$ .

[Als Beispiel für eine Argumentation zu (b) sei hier begründet, warum  $A \Delta B = A \Rightarrow B = \emptyset$ :  
Es gelte die Voraussetzung  $A \Delta B = A$ .

Nun soll gezeigt werden, dass dann  $B$  keine Elemente haben kann.

Angenommen, es gäbe ein Element von  $B$ , nennen wir es  $b$ , so dass  $b \in B$  gilt. Dann wäre entweder (1)  $b \in A$  oder (2)  $b \notin A$ .

Im Fall (1),  $b \in A$ , gälte (wegen  $b \in B$ )  $b \notin A \setminus B$  und (wegen  $b \in A$ )  $b \notin B \setminus A$ , zusammen also  $b \notin A \Delta B$ , und (wegen  $A \Delta B = A$ )  $b \notin A$ . (1) führt also zu einem Widerspruch.

Im Fall (2),  $b \notin A$ , gälte (wegen  $A \Delta B = A$ )  $b \notin A \Delta B$ , insbesondere (wegen der Definition von  $\Delta$ ) auch  $b \notin B \setminus A$ , obwohl  $b \in B$  und  $b \notin A$ . (2) führt also auch zu einem Widerspruch.

Auf jeden Fall führt  $b \in B$  zu einem Widerspruch. Also muss  $B$  leer sein.]

## 2.6 Mengenoperationen, Anzahl der Elemente

Wir zeichnen ein Mengendiagramm für  $F$ ,  $L$  und  $V$ , und tragen gelb unterlegt die bekannten Anzahlen der Elemente ein.  $FL$  entspricht  $F \cap L$  und ist rot und grün berandet, analog  $FV$ ,  $LV$ ,  $V$  und  $FLV$ .

Die eingerahmten Zahlen zählen die Elemente in den kleinsten ungeteilten Flächenstückchen, die zueinander disjunkt sind und deren Mächtigkeiten sich daher bei Vereinigung addieren. Diese können per Addition und Subtraktion bestimmt werden.

[Vgl. Siebformel in Kapitel 8]

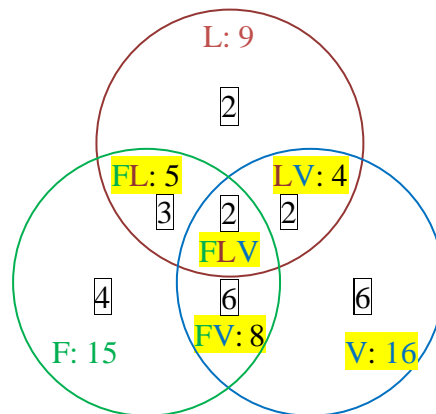

- alle 29 Artikel außer denen in  $L$ , also  $29 - 9 = 20$  Artikel
- mit mindestens zwei der Themen, aber nicht mit dreien, zusammengesetzt aus drei disjunkten Mengen:  $FL \setminus FLV$ ,  $LV \setminus FLV$ ,  $FV \setminus FLV$ , also  $(5-2)+(4-2)+(8-2) = 3+2+6 = 11$  Arbeiten
- mit mindestens einem, aber nicht mit genau zwei oder genau drei der Gebiete, zusammengesetzt aus drei disjunkten Mengen  $NurF$ ,  $NurL$  und  $NurV$ . z.B.  $NurL = L \setminus [(LV \setminus FLV) \cup (FL \setminus FLV) \cup FLV]$ , analog  $NurF$  und  $NurV$ , also  $|NurL| = 9 - (2+3+2) = 2$ , analog  $|NurF| = 15 - (6+3+2) = 4$ , und  $|NurV| = 6$ . Zusammen  $2+4+6 = 12$  Arbeiten über genau eines der Gebiete
- Die oben abgezählten disjunkten Teilmengen von  $L \cup F \cup V$  haben zusammen  $2+3+2+2+4+6+6 = 25$  Elemente, also bleiben  $29 - 25 = 4$  der Arbeiten ohne Bezug zu  $L$ ,  $F$  oder  $V$ .

## 2.7 Ordnungseigenschaften der Inklusion

Transitivität: Sei  $A \subseteq B$  und  $B \subseteq C$ , d.h. für alle  $x$  gilt:  $x \in A \Rightarrow x \in B$  und  $x \in B \Rightarrow x \in C$ . Also gilt für jedes  $x$  mit  $x \in A$  auch  $x \in B$  und somit auch  $x \in C$ . Wir haben gezeigt: Jedes Element von  $A$  ist Element von  $C$ , und das bedeutet  $A \subseteq C$ .

Antisymmetrie: Sei  $A \subseteq B$  und  $B \subseteq A$ , d.h. für alle  $x$  gilt:  $x \in A \Rightarrow x \in B$  und  $x \in B \Rightarrow x \in A$ . Also gilt für jedes  $x$  mit  $x \in A$  auch  $x \in B$  und umgekehrt.

Wir haben gezeigt:  $A$  und  $B$  haben die gleichen Elemente, und das bedeutet nach dem Extensionalitätsaxiom  $A = B$ .

Kleinstes Element: Da es keine Elemente in  $\emptyset$  gibt, gilt, dass alle Elemente von  $\emptyset$  auch Elemente von  $A$  sind [genauso wie nach den Regeln der Logik auch alle Lamborghinis des Verfassers lila sind].

## 2.8 Algebraische Eigenschaften von Mengenoperationen

Kommutativität: Für alle  $x$  gilt

$$\begin{aligned} x \in A \cap B &\Leftrightarrow x \in A \text{ und } x \in B \\ &\Leftrightarrow x \in B \text{ und } x \in A \\ &\Leftrightarrow x \in B \cap A. \end{aligned}$$

Assoziativität: Für alle  $x$  gilt

$$\begin{aligned} x \in (A \cap B) \cap C &\Leftrightarrow x \in A \cap B \text{ und } x \in C \\ &\Leftrightarrow x \in A \text{ und } x \in A \text{ und } x \in C \\ &\Leftrightarrow x \in A \text{ und } x \in B \cap C \\ &\Leftrightarrow x \in A \cap (B \cap C). \end{aligned}$$

## 2.9 Aussonderungssaxiom

Laut Aussonderungssaxiom existiert  $\{x \in A \mid x \in B\} = \{x \mid x \in A \text{ und } x \in B\} = A \cap B$ .

## 2.10 Mengenoperationen mit Universum

- (a)  $\{1,2,3,5\}$       (b)  $\{1,3\}$       (c)  $\{2,4,6\}$       (d)  $\{1,2,3,6\}$       (e)  $\{1,3\}$   
(f)  $\{\emptyset, \{1\}, \{2\}, \{3\}, \{1,2\}, \{1,3\}, \{2,3\}, \{1,2,3\}\}$

## 2.11 Potenzmenge

Induktionsanfang: Die Aussage stimmt für  $n = 0$ , denn  $\emptyset$  hat genau eine Teilmenge:  $\emptyset$ .

Annahme: Die Aussage stimmt für  $n$ , d.h. alle Mengen mit  $n$  Elementen haben  $2^n$  Teilmengen.

Ziel: Die Aussage stimmt für  $n+1$ , d.h. alle Mengen mit  $n+1$  Elementen haben  $2^{n+1}$  Teilmengen.

Das Ziel folgt aus der Annahme: Sei  $A$  eine Menge mit  $n+1$  Elementen. Dann existiert ein  $a \in A$ , da  $A$  mindestens 1 Element hat. Dann hat  $A \setminus \{a\}$  genau  $n$  Elemente, also gemäß Annahme  $2^n$  Teilmengen  $M_1, \dots, M_{2^n}$ .

Die  $2^n$  Mengen  $M_1 \cup \{a\}, M_2 \cup \{a\}, \dots, M_{2^n} \cup \{a\}$  sind alle untereinander und von den Mengen  $M_1, \dots, M_{2^n}$  verschieden, und sie sind alle Teilmengen von  $A$ . Jede Teilmenge von  $A$  enthält entweder  $a$  nicht und ist dann eine von  $M_1, \dots, M_{2^n}$ , oder sie enthält  $a$  und ist dann eine von  $M_1 \cup \{a\}, \dots, M_{2^n} \cup \{a\}$ . Also hat  $A$  genau diese  $2^n + 2^n$ , also  $2^{n+1}$ , verschiedenen Teilmengen.

## 2.12 Potenzmenge als Mengenrelation

Wir vergleichen exemplarisch  $\mathbf{P}(\{1\})$  mit  $\mathbf{P}(\mathbf{P}(\{1\}))$ . Wäre die Relation transitiv, dann wären die beiden gleich, denn auch  $\mathbf{P}(\mathbf{P}(\{1\}))$  wäre die Potenzmenge von  $\{1\}$ .

$\{1\}$  hat genau zwei Teilmengen,  $\emptyset$  und  $\{1\}$ . Also hat  $\mathbf{P}(\{1\})$  2 Elemente. und hat als 2-elementige Menge genau 4 Teilmengen (vgl. Aufgabe 2.11). Somit hat  $\mathbf{P}(\mathbf{P}(\{1\}))$  vier Elemente, und es kann nicht  $\mathbf{P}(\{1\}) = \mathbf{P}(\mathbf{P}(\{1\}))$  sein, sonst hätten sie die gleichen – und insbesondere gleich viele – Elemente.

[Man kann auch konkret die beiden Mengen ausrechnen (d.h. ihre Elemente auflisten) und feststellen, dass zumindest eine ein Element enthält, das die andere nicht enthält, so dass sie verschieden sind.]

## 2.13 Potenzmenge und Mengenoperationen

$$\begin{aligned} M \in \mathbf{P}(A \cap B) &\Leftrightarrow M \subseteq A \cap B \\ &\Leftrightarrow M \subseteq A \text{ und } M \subseteq B \\ &\Leftrightarrow M \in \mathbf{P}(A) \text{ und } M \in \mathbf{P}(B) \\ &\Leftrightarrow M \in \mathbf{P}(A) \cap \mathbf{P}(B), \end{aligned}$$

also  $\mathbf{P}(A \cap B) = \mathbf{P}(A) \cap \mathbf{P}(B)$ .

$$\begin{aligned} M \in \{X \cap Y \mid X \subseteq A \text{ und } Y \subseteq B\} &\Leftrightarrow \text{Es existieren } X \subseteq A \text{ und } Y \subseteq B \text{ mit } M = X \cap Y, \text{ also auch mit } M \subseteq X \text{ und } M \subseteq Y \\ &\Leftrightarrow M \subseteq A \text{ und } M \subseteq B \\ &[\Rightarrow \text{wegen Transitivität vgl. Aufgabe 2.10a, und } \Leftarrow \text{ mit } X := A \text{ und } Y := B] \\ &\Leftrightarrow M \in \mathbf{P}(A) \text{ und } M \in \mathbf{P}(B) \\ &\Leftrightarrow M \in \mathbf{P}(A \cap B) \end{aligned}$$

also  $\{X \cap Y \mid X \subseteq A \text{ und } Y \subseteq B\} = \mathbf{P}(A \cap B)$ .

Alle drei Mengen sind gleich.

## 2.14 Die Existenz von Paarmengen

- a) Seien zwei (gleiche oder verschiedene) Objekte  $a$  und  $b$  gegeben. Sei  $F$  das zweistellige Prädikat  $F(x, y) :\Leftrightarrow (x = \emptyset \text{ und } y = a) \text{ oder } (x \neq \emptyset \text{ und } y = b)$ . Es ist rechts-eindeutig und erfüllt damit die linke Seite  $\forall X \forall Y \forall Z ([F(X, Y) \wedge F(X, Z)] \Rightarrow Y = Z)$  des Ersetzungsaxioms. Damit gilt auch dessen rechte Seite, mit passend umbenannten Variablen also:  $(\circ) \forall B \exists A (Menge(A) \wedge \forall x [x \in A \Leftrightarrow \exists z (z \in B \wedge F(z, x))])$ . Diese wenden wir auf unser  $F$  und  $B := P(P(\emptyset)) = \{\emptyset, \{\emptyset\}\}$  an. Ein dazu existierendes  $A$  wie in  $(\circ)$  ist eine Menge und erfüllt  $x \in A \Leftrightarrow \exists z (z \in B \wedge F(z, x))$ , d.h. aber  $\Leftrightarrow (x = a \text{ oder } x = b)$ .  
Da dies mit jedem  $a$  und  $b$  klappt, gilt das Paarmengenaxiom  $\forall a \forall b \exists A \forall x (x \in A \Leftrightarrow (x = a \text{ oder } x = b))$ .
- b) Das obige  $A$  ist nach dem Extensionalitätsaxiom eindeutig, und man schreibt es als  $\{a, b\}$ . Wendet man das Paarmengenaxiom auf  $a$  und  $b$  im Falle  $a = b$  an, so erhält man  $\{a, a\}$ , wiederum gemäß Extensionalitätsaxiom eindeutig, und man schreibt dafür üblicherweise  $\{a\}$ .
- c) Zu Mengen  $A$  und  $B$  existiert nach dem Paarmengenaxiom die Menge  $C = \{A, B\}$  und dazu nach dem Vereinigungsaxiom eine (wegen Extensionalität wieder eindeutige) Menge  $D = \bigcup C$ , so dass  $x \in \bigcup \{A, B\} \Leftrightarrow (x \in A \text{ oder } x \in B)$ . Man schreibt  $A \cup B$  anstelle von  $\bigcup \{A, B\}$ .

## 2.15 Unabhängigkeit von Axiomen

Aussonderungsaxiom: Sei  $P$  eine in der Sprache der Mengenlehre definierte mögliche Eigenschaft von Objekten und  $A$  ein Objekt. Sei  $F$  das zweistellige Prädikat

$$F(x, y) :\Leftrightarrow (P(x) \text{ und } x = y).$$

Es entspricht der „partiellen identischen Abbildung“ auf allen Objekten mit  $P$ . Zu  $A$  liefert das Ersetzungsaxiom das Objekt  $F[A]$ , das genau alle Elemente von  $A$  enthält, die die Eigenschaft  $P$  haben – das gesuchte Objekt

$$\{x \in A \mid P(x)\}.$$

leere Menge: Sei  $a$  ein Objekt der ZFU-Mengenlehre [welches nach Logik-Konvention existieren soll], gleich ob Menge oder Urelement. Das Objekt  $\{x \in a \mid x = \emptyset \text{ und } x \neq \emptyset\}$  ist die gesuchte Menge ohne Elemente.

## 2.16 Überraschungen in der axiomatischen Mengenlehre

Nach der Paardefinition ist  $(0, 1) = \{\{0\}, \{0, 1\}\}$

Nach der Zahlendefinition ist  $0 = \emptyset, 1 = \{0\}, 2 = \{0, 1\}$

Somit gilt wegen  $\{0, 1\} \in \{\{0\}, \{0, 1\}\}$ :  $2 \in (0, 1)$ .
