# Supplementary material
Source: publisher site journal article supplement (https://www.degruyterbrill.com/publication/isbn/9783111336107/downloadAsset/9783111336107_L%C3%B6sungen.zip)
Supplement: Supplementary file 2 [file Lsungen_Kapitel 3.pdf › Lsungen_Kapitel 3.pdf]

**Lösungen der Übungsaufgaben in  
Diskrete Mathematik kompakt  
(Bernd Baumgarten, De Gruyter, 2024)  
– Kapitel 3: Relationen und Funktionen –**

Bitte beachten Sie:

- Versuchen Sie stets, die Aufgabe zunächst selbst zu lösen! Das Anschauen einer gelösten Übungsaufgabe *ohne vorherigen eigenen ernsthaften Bearbeitungsversuch* nützt Ihnen hinsichtlich des Lernerfolgs oft nicht mehr als der Genuss einer Tasse Kaffee: Es erzeugt einfach nur vorübergehend ein angenehmes Gefühl, hinterlässt aber keinen bleibenden Effekt.
- Zu jeder Aufgabe kann es verschiedene korrekte Lösungen bzw. Lösungswege und für jede Lösung mehrere Schreibweisen geben. Daher sind die in der Folge vorgestellten Lösungen durchweg nur als Beispiele zu verstehen.
- Zusätzliche Erklärungen stehen in eckigen Klammern [ ... ].
- Auch in Übungsaufgaben können Fehler stecken. Bitte beachten Sie die eventuelle Korrigenda-Datei des Verlages.

### 3.1 Relationen

(b) trifft zu, (a) und (c) treffen nicht zu.

- i) Beispiele mit veränderter erster Komponente:
  - (a)  $R(\text{St. Kubrick, Uhrwerk Orange})$
  - (c)  $R(\text{F.W. Murnau, Nosferatu – Eine Symphonie des Grauens})$ ,
- ii) Beispiele mit veränderter zweiter Komponente:
  - (a)  $R(\text{R. Altman, Nashville})$
  - (c)  $R(\text{F. Lang, Metropolis})$

### 3.2 Relationengraphen

- a)  $T = \{(2,2), (2,4), (2,6), (2,8), (3,3), (3,6), (4,4), (4,8), (5,5), (6,6), (7,7), (8,8)\}$
- b)  $U = \{(2,2), (3,3), (4,2), (4,4), (5,5), (6,2), (6,3), (6,6), (7,7), (8,2), (8,4), (8,8)\}$

### 3.3 Relationengleichheit

- a) Es gilt  $R = S = V = W$  und  $T = U$ . Beachten Sie zu  $V$  und  $W$ , dass  $x$  der größte Teiler von  $x$  ist. Zwischen beiden „Klassen“ herrscht Ungleichheit, also z.B.  $R \neq T$ .
- b) Wegen der Gleichheiten genügt ein Gegenbeispiel, das z.B.  $R$  von  $T$  unterscheidet: So gilt beispielsweise  $R(3,2)$  [d.h.  $3 \geq 2$ ], aber nicht  $T(3,2)$  [d.h. nicht  $2 \mid 3$ ].

### 3.4 Relationeneigenschaften

Die 16 Relationen(graphen) sind in Kurzform beschrieben, z.B. aa.ab für  $\{(a,a), (a,b)\}$ , die Relationeneigenschaften sind (in der gegebenen Reihenfolge) abgekürzt zu ltot, rtot, lein, rein, sym, ants, trns, rflx. In der Tabelle sind die zutreffenden Eigenschaften angekreuzt.

| Rel\Eigensch | ltot | rtot | lein | rein | sym | ants | trns | rflx |
|--------------|------|------|------|------|-----|------|------|------|
| $\emptyset$  |      |      | X    | X    | X   | X    | X    |      |
| aa           |      |      | X    | X    | X   | X    | X    |      |
| aa.ab        |      | X    | X    |      |     | X    | X    |      |
| aa.ab.ba     | X    | X    |      |      | X   |      |      |      |
| aa.ab.ba.bb  | X    | X    |      |      | X   |      | X    | X    |
| aa.ab.bb     | X    | X    |      |      |     | X    | X    | X    |
| aa.ba        | X    |      |      | X    |     | X    | X    |      |
| aa.ba.bb     | X    | X    |      |      |     | X    | X    | X    |
| aa.bb        | X    | X    | X    | X    | X   | X    | X    | X    |
| ab           |      |      | X    | X    |     | X    | X    |      |
| ab.ba        | X    | X    | X    | X    | X   |      |      |      |
| ab.ba.bb     | X    | X    |      |      | X   |      |      |      |
| ab.bb        | X    |      |      | X    |     | X    | X    |      |
| ba           |      |      | X    | X    |     | X    | X    |      |
| ba.bb        |      | X    | X    |      |     | X    | X    |      |
| bb           |      |      | X    | X    | X   | X    | X    |      |

### 3.5 Abbildungseigenschaften

einige mögliche Antworten:

- a)  $L = \{a, b\}, R = \{a, b, c\}; L = \{a\}, R = \{a, b, c\}$  oder  $R = \{a, b\}$
- b)  $L = R = \{a, b, c\}; L = R = \{a, b\}; L = R = \{a\}$
- c)  $L = R = \{a\}$
- d)  $L = \{a\}, R = \{a, b, c\}$  oder  $R = \{a, b\}$

### 3.6 Partielle Abbildungen

$f(x) = x/2$ , und zwar definiert auf allen geraden nichtnegativen Zahlen, 0, 2, 4, ...

[  $z$  wird hochgezählt, bis es das gerade  $x$  erreicht. Ein ungerades  $x$  wird nie erreicht.  $y$ , der Funktionswert in spe, wird halb so schnell wie  $z$  hochgezählt.]

### 3.7 Äquivalenzrelationen

Reflexivität: Wegen  $A = \bigcup P = \bigcup_{M \in P} M$  ist jedes Element  $a \in A$  Element mindestens einer

Menge  $M \in P$ . Also gilt  $\exists M \in P (a \in M \text{ und } a \in M)$  und damit [gemäß Definition von  $R$ ]  $aRa$ .  $R$  ist also reflexiv.

Symmetrie: Es gelte  $aRb$ . Laut Definition von  $R$  existiert ein  $M \in P$  mit  $a \in M$  und  $b \in M$ , also natürlich auch  $b \in M$  und  $a \in M$ , also auch  $bRa$ .  $R$  ist symmetrisch.

Transitivität: Es gelte  $aRb$  und  $bRc$ . Es gibt also  $M, N \in P$  mit  $a, b \in M$  und  $b, c \in N$ . Wegen  $b \in M \cap N$  ist gemäß den Partitionseigenschaften  $M = N$ . Somit gibt es ein  $M \in P$  mit  $a \in M$  und  $c \in M$ , d.h.  $aRc$ . Insgesamt folgt aus  $aRb$  und  $bRc$ , dass  $aRc$  gilt,  $R$  ist transitiv.

### 3.8 Äquivalenzrelationen

- a) Wegen der Eindeutigkeit der Primfaktorzerlegung ist  $f : M \rightarrow \mathbb{N}_0$  mit

$f(x) :=$  die größte Hochzahl  $n \in \mathbb{N}_0$  derart, dass  $2^n$  noch Teiler von  $x$  ist, eine Abbildung.  $R$  stimmt überein mit der durch gleiche  $f$ -Werte definierte Relation  $R_f$ , ist also nach Satz 3.3 eine Äquivalenzrelation.

- b)  $M/R = \{ \{1,3,5,7,9\}, \{2,6,10\}, \{4\}, \{8\} \}$

[Die Klassenelemente enthalten maximal  $2^0, 2^1, 2^2$  bzw.  $2^3$  als Teiler.]

### 3.9 Kongruenzen

Die begonnene Kongruenz-Definition ist zu ergänzen um:

... im Falle, dass aus  $a_1 R b_1, \dots, a_n R b_n$  immer  $Q(a_1, \dots, a_n) \Rightarrow Q(b_1, \dots, b_n)$  folgt.

Natürlich geht auch  $\Leftrightarrow$  anstelle von  $\Rightarrow$  [da man die Rollen der  $a_i$  und  $b_i$  vertauschen kann].

Diese Voraussetzung sorgt dafür, dass das Zutreffen oder Nichtzutreffen von  $Q/R$  unabhängig von der Wahl des ausgewählten Elements  $a_i$  in der Klasse  $[a_i]$ , also  $Q/R$  wohldefiniert ist.

### 3.10 Totalordnungen

Seien also  $Q$  eine strenge Totalordnung und  $R$  gegeben durch  $xRy : \Leftrightarrow (xQy \text{ oder } x = y)$ .

$R$  ist total:

Sind  $a$  und  $b$  aus  $A$ , so liefert die Trichotomie von  $Q$ , dass  $a = b$ ,  $aQb$  oder  $bQa$ , und damit in Fall 1 und 2  $aRb$  sowie in Fall 3  $bRa$ .

$R$  ist reflexiv:

$x = x$ , und damit  $xRx$ .

$R$  ist antisymmetrisch:

Gilt  $xRy$  und  $yRx$ , dann  $(xQy \text{ oder } x = y)$  und  $(yQx \text{ oder } x = y)$ . Wäre nun  $x \neq y$ , so gälte  $xQy$  und  $yQx$ , was wegen der Trichotomie von  $Q$  nicht sein kann. Also folgt  $x = y$ .

$R$  ist transitiv:

Nehmen wir an, es gilt  $xRy$  und  $yRz$ . Ist  $x = y$ , so gilt wegen  $yRz$  auch  $xRz$ . Ist  $y = z$ , so gilt wegen  $xRy$  auch  $xRz$ . Gilt weder  $x = y$  noch  $y = z$ , so gilt wegen der Definition von  $R$   $xQy$  und  $yQz$ , also wegen der Transitivität von  $Q$  auch  $xQz$  und damit  $xRz$ .

### 3.11 Verbände

Wir beweisen jeweils die erste der beiden Rechenregeln eines Paares; die zweite zeigt man unter Vertauschung von  $\sqcap, \sqcup, \triangle$  und  $\nabla$ , inf und sup, „größte“ und „kleinste“.

Zunächst gelten wegen der Existenz und der Definition der Infima

$$x \leq \inf \{y, z\} \Leftrightarrow x \leq y \text{ und } x \leq z. \quad (\#)$$

und

$$x \sqcap z = x \Leftrightarrow x \leq z \quad [\Leftrightarrow x \sqcup z = z]. \quad (\circ)$$

$$(a \sqcap b) \sqcap c = \inf \{ \inf \{a, b\}, c \}$$

= das größte Element, das  $\leq \inf \{a, b\}$  und  $c$  ist

= das größte Element, das  $\leq a, b$  und  $c$  ist

wegen (#)

= das größte Element, das  $\leq a$  und  $\inf \{b, c\}$  ist

wegen (#)

$$= \inf \{a, \inf \{b, c\}\}$$

$$= a \sqcap (b \sqcap c)$$

$$a \sqcap b = \text{das größte Element, das } \leq a \text{ und } \leq b \text{ ist}$$

$$= \text{das größte Element, das } \leq b \text{ und } \leq a \text{ ist}$$

$$= b \sqcap a$$

$$x \sqcap (x \sqcup y) = x \Leftrightarrow x \leq x \sqcup y$$

wegen (○)

... und letzteres gilt, da  $x \sqcup y$  als Supremum  $\geq x$  und  $y$  ist.

### 3.12 Extremale Elemente

Wir führen den Beweis für „maximal“; für „minimal“ geht er analog. Die Halbordnung sei  $R$ . Für  $aRb$  und  $a \neq b$  schreiben wir  $a < b$ . Sei  $x_1 \in M$ . Ist  $x_1$  maximal, sind wir fertig; wenn nicht, existiert ein  $x_2 \in M$  mit  $x_1 < x_2$ . Ist  $x_2$  maximal sind wir fertig, wenn nicht ... und so fort. So erhalten wir entweder nach endlich vielen Schritten ein maximales  $x_n$  oder eine unendliche Folge  $x_1 < x_2 < \dots$ . Letzteres kann aber nicht sein: Wegen der Transitivität von  $<$  gibt es keine zwei Folgenglieder mit  $x_i = x_k$  und  $i \neq k$ , also gäbe es dann unendlich viele  $x_i \in M$ , im Widerspruch zur Endlichkeit von  $M$ .

### 3.13 Lineare Erweiterungen einer Halbordnung

In den folgenden Beispielen sind die Totalordnungen jeweils aufsteigend aufgezählt. Die Paare der gegebenen Halbordnungen sind immer die Paare, die in allen angegebenen Totalordnungen so geordnet sind, wenn auch – unter Berücksichtigung der Transitivität – nicht unbedingt als unmittelbare Nachbarn.

a)  $a-b-c, c-a-b$

b)  $a-b-c-d, c-d-a-b$

c)  $a-c-b-d, c-d-a-b, c-a-b-d$

### 3.14 Operationen auf Relationen (beachte: Errata-Seite)

a)  $R_8$

$$mR_2^{-1}n \Leftrightarrow nR_2m \Leftrightarrow n+2=m \Leftrightarrow \underline{m-2=n}$$

b)  $R_m R_n = R_{m+n}$

$$(R_n)^{-1} = R_{-n}$$

c)  $\{R_1\}$

### 3.15 Bijektion und Umkehrabbildung

Sei  $f : A \rightarrow B$  bijektiv, also

- surjektiv, d.h. für alle  $b \in B$  existiert ein  $a \in A$  mit  $f(a) = b$ , und
- injektiv, d.h. für alle  $a_1, a_2 \in A$  mit  $f(a_1) = f(a_2)$  gilt  $a_1 = a_2$ .

Zu jedem  $b \in B$  existiert nun nicht nur *mindestens* ein  $a \in A$  mit  $f(a) = b$ , sondern *genau* eines (nämlich wegen Injektivität auch *höchstens* eines).

Mit der Abbildung

$$g : \begin{cases} B \rightarrow A \\ b \mapsto \text{das } a \text{ mit } f(a) = b \end{cases}$$

gilt für alle  $b \in B$ :  $g(b)$  hat per Definition die Eigenschaft  $f(g(b)) = b$ . Also ist  $f \circ g = id_B$ .

Ebenso ist für alle  $a \in A$  per Definition  $g(f(a))$  dasjenige  $x \in A$  mit  $f(x) = f(a)$ , d.h.  $g(f(a)) = a$ . Also ist  $g \circ f = id_A$ . Insgesamt ist wegen  $f(a) = b \Leftrightarrow g(b) = a$  bewiesen, dass  $g = f^{-1}$ .

Es existiere umgekehrt zu  $f : A \rightarrow B$  eine Umkehrabbildung  $g : B \rightarrow A$ , für die also  $f \circ g = id_B$  und  $g \circ f = id_A$  gilt.

- Für jedes  $b \in B$  gilt  $g(b) \in A$  und  $f(g(b)) = b$ , also  $b \in f[A]$  –  $f$  ist surjektiv.
- Sind  $a_1, a_2 \in A$  mit  $f(a_1) = f(a_2)$ , so ist  
 $a_1 = id_A(a_1) = g(f(a_1)) = g(f(a_2)) = id_A(a_2) = a_2$ , d.h.  $f$  ist injektiv.

### 3.16 Existenz von Bijektionen als Relation

a)  $id_M : M \rightarrow M$  ist bijektiv, also  $M \sim M$ ;  $\sim$  ist reflexiv.

b) Gilt  $M \sim N$ , so existiert eine bijektive Abbildung  $f : M \rightarrow N$ .

Dann ist  $f^{-1} : N \rightarrow M$  ebenfalls bijektiv, und es gilt  $N \sim M$ .  $\sim$  ist also symmetrisch.

c) Gilt  $M \sim N$  und  $N \sim O$ , so existieren bijektive Abbildungen  $f : M \rightarrow N$  und  $g : N \rightarrow O$ . Dann ist  $g \circ f$  eine Abbildung  $M \rightarrow O$ . Ist sie auch eine Bijektion? In der Tat ist

- die Hintereinanderausführung zweier surjektiver Abbildungen auch surjektiv, denn zu  $o \in O$  existiert  $n \in N$  mit  $g(n) = o$ ; zu  $n \in N$  existiert  $m \in M$  mit  $f(m) = n$ ; also  $g(f(m)) = o$ .
- und die Hintereinanderausführung zweier injektiver Abbildungen auch injektiv, denn aus  $g(f(m_1)) = o = g(f(m_2))$ , für  $o \in O$  und  $m_1, m_2 \in M$  folgt  $f(m_1) = f(m_2)$  aus der Injektivität von  $g$  und daraus  $m_1 = m_2$  mit der von  $f$ .

### 3.17 Permutationen

Wir zeigen mit vollständiger Induktion bezüglich  $n$  etwas mehr, nämlich:

- (○) Von einer endlichen Menge  $M$  mit  $n$  Elementen auf eine Menge  $N$  mit gleich vielen Elementen (z.B.  $N = M$ ) gibt es genau  $n! [= 1 \cdot 2 \cdot 3 \cdot \dots \cdot n]$  verschiedene bijektive Abbildungen.

Induktionsanfang: (○) gilt für  $n = 1$ , da es dann genau eine Abbildung gibt, die auch bijektiv ist.

Induktionsannahme: (○) gilt für  $n$ .

Induktionsschritt: Die Menge sei  $M = \{a_1, \dots, a_{n+1}\}$ , und  $\pi$  sei eine bijektive Abbildung von  $M$  auf  $N$ . Es gibt  $n$  Möglichkeiten für  $\pi(a_{n+1})$ , und dann ist jeweils  $\pi$ , eingeschränkt auf  $M \setminus \{a_{n+1}\}$ , d.h.  $\{a_1, \dots, a_n\}$ , eine bijektive Abbildung  $\psi$  einer endlichen Menge mit  $n$  Elementen auf eine andere mit gleich vielen Elementen. Wegen (○) für  $n$  gibt es für  $\psi$   $n!$  unterschiedliche Möglichkeiten, somit für  $\pi$  insgesamt  $(n+1) \cdot n!$ , d.h.  $(n+1)!$  unterschiedliche Möglichkeiten – (○) gilt also auch für  $n+1$ .

### 3.18 Permutationen

Jeden Zyklus kann man mit jedem der Elemente an der ersten Stelle schreiben. So ist beispielsweise  $(x_1 x_2 \dots x_k) = (x_2 x_3 \dots x_k x_1)$ .

Haben zwei Bahnen  $(x_1 x_2 \dots x_i)$  und  $(y_1 y_2 \dots y_k)$  von  $\pi$  ein Element gemeinsam, dann können wir dieses bei beiden an den Anfang schreiben, d.h. ohne Beschränkung der Allgemeinheit wäre dann  $x_1 = y_1$ . Wenden wir nun immer wieder  $\pi$  auf beide Seiten der Gleichung an, gilt der Reihe nach  $x_2 = \pi(x_1) = \pi(y_1) = y_2$ ,  $x_3 = y_3$ , etc., so dass letztlich auch beide Zyklen gleich lang und summa summarum identisch sein müssen.

Haben die zwei Bahnen andererseits kein gemeinsames Element, so sind sie disjunkt.

### 3.19 Permutationen

$i < k \Rightarrow (ik) = (k \ k-1 \dots i+2 \ i+1) \circ (i \ i+1 \dots k-1 \ k)$ . Das lesen wir an folgender Skizze der einzelnen Abbildungen und der gesamten Abbildung ab:

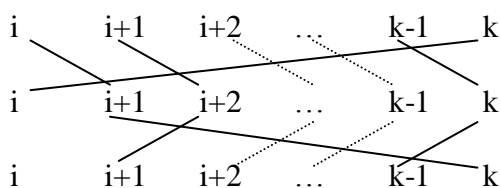

### 3.20 Permutationen

- a) 3, 6, 5, 4, 1, 2
- b)  $(1 \ 3 \ 5) \circ (2 \ 6)$
- c)  $(1 \ 5 \ 3) \circ (1 \ 5 \ 3) \circ (2 \ 6)$  [weitere Beispiele in (d) und (e)]
- d)  $(1 \ 3) \circ (3 \ 5) \circ (2 \ 6)$
- e)  $(2 \ 3) \circ (1 \ 2) \circ (2 \ 3) \circ (4 \ 5) \circ (3 \ 4) \circ (4 \ 5) \circ (5 \ 6) \circ (4 \ 5) \circ (3 \ 4) \circ (2 \ 3) \circ (3 \ 4) \circ (4 \ 5) \circ (5 \ 6)$

### 3.21 Simultane und gewöhnliche induktive Definition

- $(w, \varepsilon)$  ist ein BaumOderWald.
- Sind  $(w, x)$  und  $(w, y)$  BaumOderWald, so ist  $(w, xy)$  ein BaumOderWald.
- Ist  $(w, x)$  ein BaumOderWald, so ist  $(b, (x))$  ein BaumOderWald.

### 3.22 Induktiver Beweis

- a) Es stimmt für  $n=0$ , denn  $3^0 + 7 = 1 + 7 = 8$ .

Es stimme für  $n$ :  $3^{2n} + 7 = 8 \cdot m$ .

Dann gilt

$$3^{2(n+1)} + 7 = 3^{2n+2} + 7 = 9 \cdot 3^{2n} + 7 = 8 \cdot 3^{2n} + (3^{2n} + 7) = 8 \cdot 3^{2n} + 8 \cdot m = 8 \cdot (3^{2n} + m),$$

d.h. es stimmt für  $n+1$ .

- b) Es stimmt für  $n=0$ ,  $\sum_{i=1}^0 i^2 = 0 \cdot (0+1) \cdot (2 \cdot 0 + 1) / 6 = 0$ , da eine Summe über 0 Zahlen als 0 definiert ist.

[Abgesehen von diesem Sonderfall sieht man es noch „überzeugender“ für  $n=1$ , denn  $\sum_{i=1}^1 i^2 = 1^2 = 1 = 1 \cdot 2 \cdot 3 / 6$ .]

Es stimme für  $n$ :  $\sum_{i=1}^n i^2 = n \cdot (n+1) \cdot (2n+1) / 6$ .

Dann stimmt es wegen

$$\begin{aligned} \sum_{i=1}^{n+1} i^2 &= n \cdot (n+1) \cdot (2n+1) / 6 + (n+1)^2 \\ &= \frac{2n^3 + 3n^2 + n}{6} + \frac{6n^2 + 12n + 6}{6} \\ &= \frac{2n^3 + 9n^2 + 13n + 6}{6} \\ &= \frac{(n+1) \cdot (n+2) \cdot (2n+3)}{6} \\ &= (n+1) \cdot ((n+1)+1) \cdot (2(n+1)+1) / 6 \end{aligned}$$

auch für  $n+1$ .

- c) Es stimmt für  $n=0$ ,  $\sum_{i=1}^0 2i-1 = 0$ . [Summe über 0 Zahlen, vgl. (c)]

Es stimme für  $n$ :  $\sum_{i=1}^n (2i-1) = n^2$ .

Dann stimmt es wegen

$$\begin{aligned} \sum_{i=1}^{n+1} (2i-1) &= \sum_{i=1}^n (2i-1) + [2(n+1)-1] \\ &= n^2 + 2n + 1 \\ &= (n+1)^2 \end{aligned}$$

auch für  $n+1$ .

Anschaulich ist die Formel  
aus der Abbildung rechts abzulesen:

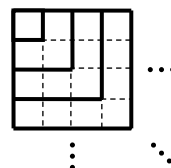

- d) Ein Produkt aus 0 Faktoren wird als 1 definiert, eines aus einem Faktor  $x$  als  $x$ .

(#)  $\prod_{i=0}^{n-1} F_i + 2 = \prod_{i=0}^{n-1} (2^{2^i} + 1) + 2 = 2^{2^{n+1}} + 1 = F_n$  stimmt für  $n=0$ , denn

$$\prod_{i=0}^{0-1} F_i + 2 = 1 + 2 = 2^1 + 1 = 2^{2^{0+1}} + 1 = F_0.$$

(#) stimme für  $n$ . Dann stimmt (#) wegen

$$\begin{aligned} \prod_{i=0}^{(n+1)-1} F_i + 2 &= \left( \prod_{i=0}^{n-1} (2^{2^i} + 1) \right) (2^{2^n} + 1) + 2 = (2^{2^n} + 1 - 2)(2^{2^n} + 1) + 2 \\ &= (2^{2^n} - 1)(2^{2^n} + 1) + 2 = \left( (2^{2^n})^2 - 1 \right) + 2 \\ &= 2^{2 \cdot 2^n} + 1 = 2^{2^{n+1}} + 1 \\ &= F_{n+1}. \end{aligned}$$

### 3.23 Induktiver Beweis?

Hier ist  $stets\_gleich\_alt(n)$ : „In jeder Gruppe von  $n$  Personen sind alle gleich alt.“

In einem korrekten Induktionsschritt würde für beliebige  $n$  gefolgert:

$$stets\_gleich\_alt(n) \Rightarrow stets\_gleich\_alt(n+1) \quad (\#).$$

Im angegebenen „Beweis“ wird aber stillschweigend angenommen, dass  $n \geq 2$ , da es unter den  $n+1$  Personen ja drei verschiedene geben soll, damit der Beweisgedanke funktioniert. Es wird also nur  $(stets\_gleich\_alt(n) \text{ und } n \geq 2) \Rightarrow stets\_gleich\_alt(n+1)$  anstelle von  $(\#)$  gezeigt. Das lässt eine Beweislücke beim Induktionsschritt von  $n=1$  nach  $n+1=2$ , denn für  $n=1$  ist die linke Seite nicht erfüllt, und damit ist für alle  $n \geq 2$   $stets\_gleich\_alt(n)$  auf diese Weise nicht bewiesen. [Es geht sicher auch auf keine andere Weise.]

### 3.24 Induktion und Rekursion

- a) Vorab fragen wir uns: Auf welcher induktiv definierten Menge  $Def$  sind die Binomialkoeffizienten definiert, bzw. für welche  $(n, k)$  aus  $\mathbb{N}_0 \times \mathbb{N}_0$  gilt  $Def(n, k)$ , wobei

$$Def(n, k) :\Leftrightarrow \binom{n}{k} \text{ wird in 3.24 beschrieben?}$$

Aus der Aufgabenstellung ergibt sich folgende induktive Definition von  $Def$ :

*Basiselemente:*  $Def$  gilt für alle  $(n, k)$  aus  $\mathbb{N}_0 \times \mathbb{N}_0$  mit  $k=0$  oder  $k=n$ .

*Erweiterungsregel:*  $Def(n, k)$  und  $Def(n, k+1) \Rightarrow Def(n+1, k+1)$ .

Erste Frage zu (a): Gilt  $Def$  für alle  $(n, k)$  aus  $\mathbb{N}_0 \times \mathbb{N}_0$  mit  $k \leq n$ ?

Wir formulieren die Frage zwecks Induktionsbeweis um:

Gilt für alle  $n \in \mathbb{N}_0$  die Aussage  $Df(n)$ , wobei

$$Df(n) :\Leftrightarrow \text{Für alle } 0 \leq k \leq n \text{ gilt } Def(n, k)?$$

*Induktionsanfang:*  $Df(0)$  gilt, denn  $(0,0)$  ist Basiselement.

*Induktionsschritt:* Wenn  $Df(n)$  gilt, ist nun für  $k=0, 1, \dots, n, n+1$  zu zeigen, dass  $Def(n+1, k)$  gilt.  $Def(n+1, 0)$  gilt, da  $(n+1, 0)$  Basiselement ist. Die anderen zweiten Komponenten haben die Form  $k+1$  mit  $0 \leq k \leq n$ . Wegen der Erweiterungsregel oben und der Induktionsannahme  $Df(n)$  gilt auch hier  $Def(n+1, k+1)$ . Also gilt  $Df(n+1)$ .

Somit ist die erste Frage mit ja zu beantworten.

Zweite Frage zu (a): Ist  $\binom{n}{k}$  rekursiv wohldefiniert?

Offenbar führt der Induktionsschritt von zwei durch  $(n+1, k+1)$  eindeutig bestimmten Vorgängern zu dem neuen Element  $(n+1, k+1)$  – die Induktion ist interferenzfrei. Allerdings taucht in der rekursiven Funktionsdefinition ein Basiselement zweimal auf, nämlich  $(0,0)$  sowohl als  $(n, 0)$  wie auch als  $(n, n)$  mit  $n=0$ . In beiden Fällen wird aber der gleiche Funktionswert zugewiesen.

Somit ist auch die zweite Frage mit ja zu beantworten.



b) Induktiver Beweis gemäß dem induktiven Aufbau von *Def* in (a):

$$\text{Basiselemente: } \binom{n}{0} = 1 = \frac{n!}{1 \cdot n!} = \frac{n!}{0! \cdot (n-0)!}, \quad \binom{n}{n} = 1 = \frac{n!}{n! \cdot 1} = \frac{n!}{n! \cdot (n-n)!}$$

Gilt  $\binom{x}{y} = \frac{x!}{y! \cdot (x-y)!}$  für  $(x, y) = (n, k)$  bzw.  $(n, k+1)$ , möchten wir dies auch für

$(x, y) = (n+1, k+1)$  zeigen. In der Tat folgt daraus

$$\begin{aligned} \binom{n+1}{k+1} &= \binom{n}{k+1} + \binom{n}{k} = \frac{n!}{(k+1)! \cdot (n-k-1)!} + \frac{n!}{k! \cdot (n-k)!} \\ &= \frac{(n-k) \cdot n! + (k+1) \cdot n!}{(k+1)! \cdot (n-k)!} = \frac{(n-k+k+1) \cdot n!}{(k+1)! \cdot (n-k)!} \\ &= \frac{(n+1) \cdot n!}{(k+1)! \cdot (n-k)!} = \frac{(n+1)!}{(k+1)! \cdot ((n+1)-(k+1))!}. \end{aligned}$$

### 3.25 Rekursiv definierte Funktionen

- a)  $plus_m(0) := m,$   
 $plus_m(succ(n)) := succ(plus_m(n)).$   
b)  $mal_m(0) := 0,$   
 $mal_m(succ(n)) := plus_m(mal_m(n)).$   
b)  $0! := 1,$   
 $(succ(n))! := mal_{succ(n)}(n!).$

### 3.26 Werteverlaufsrekursion

Gegeben:  $f(0) = 1.$

Berechnet:  $f(1) = 1 + 1 = 2,$   $f(2) = 1 + 1 + 2 = 4,$  analog  $f(3) = 8,$   $f(4) = 16.$

Gilt für alle  $n \in \mathbb{N}_0$   $f(n) = 2^n$ ?

Induktionsanfang: stimmt, s.o.

Induktionsschritt: Wenn es für 1 bis  $n$  stimmt, dann ist

$$f(n+1) = 1 + 2^0 + 2^1 + \dots + 2^{n-1} + 2^n = f(n) + 2^n = 2^n + 2^n = 2^{n+1}$$

### 3.27 Rekursive Funktionen

- a)  $rpred(m, n) := pred(n)$  ist primitiv rekursiv, denn es entsteht durch primitive Rekursion aus Grundfunktionen:

$$\begin{aligned} rpred(n_1, 0) &:= null^1(n_1) \\ rpred(n_1, n+1) &:= \pi_2^3(n_1, n, f(n_1, n)). \end{aligned}$$

Also ist  $pred(n) := rpred(n, n) = rpred(\pi_1^1(n), \pi_1^1(n))$  primitiv rekursiv, denn es entsteht durch Komposition primitiv rekursiver Funktionen.

$$\begin{aligned}
\text{b)} \quad a(2,2) &= a(1, a(2,1)) \\
&= a(1, a(1, a(2,0))) \\
&= a(1, a(1, a(1,1))) \\
&= a(1, a(1, a(0, a(1,0)))) \\
&= a(1, a(1, a(0, a(0,1)))) \\
&= a(1, a(1, a(0,2))) \\
&= a(1, a(1,3)) \\
&= a(1, a(0, a(1,2))) \\
&= a(1, a(0, a(0, a(1,1)))) \\
&= a(1, a(0, a(0, a(0, a(1,0))))) \\
&= a(1, a(0, a(0, a(0,2)))) \\
&= a(1, a(0, a(0,3))) \\
&= a(1, a(0,4)) \\
&= a(1,5) \\
&= a(0, a(1,4)) \\
&= a(0, a(0, a(1,3))) \\
&= a(0, a(0, a(0, a(1,2)))) \\
&= a(0, a(0, a(0, a(0, a(1,1))))) \\
&= a(0, a(0, a(0, a(0, a(0, a(1,0))))) \\
&= a(0, a(0, a(0, a(0, a(0, a(0,1))))) \\
&= a(0, a(0, a(0, a(0, a(0,2)))) \\
&= a(0, a(0, a(0, a(0,3)))) \\
&= a(0, a(0, a(0,4))) \\
&= a(0, a(0,5)) \\
&= a(0,6) \\
&= 7
\end{aligned}$$

### 3.28 Hüllen von Relationen

a)  $\text{Trans}(R) = \{(a,b), (a,c), (b,c)\}$

$$\text{Symm}(\text{Trans}(R)) = \{(a,b), (a,c), (b,a), (b,c), (c,a), (c,b)\}$$

$$\text{Refl}(\text{Symm}(\text{Trans}(R))) = A \times A.$$

b) Zu zeigen:  $\text{Trans} \circ \text{Refl} = \text{Refl} \circ \text{Trans}$  und  $\text{Symm} \circ \text{Refl} = \text{Refl} \circ \text{Symm}$ .

Vorüberlegungen:

(1)  $\text{Refl}(R)$  ist reflexiv, enthält also als Teilmenge nicht nur  $R$ , sondern auch  $\text{id}_A$ , d.h.  $\{(a,a) \mid a \in A\}$ . Umgekehrt ist  $R \cup \text{id}_A$  reflexiv, umfasst also als Teilmenge die kleinste reflexive  $R$  enthaltende Relation  $\text{Refl}(R)$ . Insgesamt folgt  $\text{Refl}(R) = R \cup \text{id}_A$ .

(2)  $\text{Trans}(R)$  besteht aus allen  $(a_1, a_n)$ , zu denen Paare  $(a_1, a_2), (a_2, a_3), \dots, (a_{n-1}, a_n)$  in  $R$  existieren.

$\text{Trans}(\text{Refl}(R))$  besteht also aus allen  $(a_1, a_n)$ , zu denen Paare  $(a_1, a_2), (a_2, a_3), \dots, (a_{n-1}, a_n)$  in  $\text{Refl}(R)$  existieren, also gewissermaßen Paaren, die aus Anfangs- und Endpunkten von zusammengesetzten „Pfad“ in  $\text{Refl}(R)$  bestehen. Dabei tragen die Paare aus  $\text{id}_A$  in zusammengesetzten Pfaden keine neuen Anfangs- und Endpunkte bei, so dass gilt:

$$\text{Trans}(\text{Refl}(R)) = \text{Trans}(R \cup \text{id}_A) = \text{Trans}(R) \cup \text{id}_A = \text{Refl}(\text{Trans}(R)).$$

Ferner gilt:

$$\begin{aligned} \text{Symm}(\text{Refl}(R)) &= \text{Symm}(R \cup \text{id}_A) = (R \cup \text{id}_A) \cup (R \cup \text{id}_A)^{-1} \\ &= (R \cup R^{-1}) \cup \text{id}_A = \text{Symm}(R) \cup \text{id}_A = \text{Refl}(\text{Symm}(R)). \end{aligned}$$

c) Wegen (2) in (b) hat ein Element von  $\text{Symm}(\text{Trans}(R))$  die Form  $(a_1, a_n)$ , wobei Paare  $(a_1, a_2), (a_2, a_3), \dots, (a_{n-1}, a_n)$  in  $R$  oder ebensolche Paare, aber alle aus  $R^{-1}$ , existieren. Diese Folgen ist in beiden Fällen eine Folge  $(a_1, a_2), (a_2, a_3), \dots, (a_{n-1}, a_n)$  aus Paaren aus  $R \cup R^{-1}$ , also  $(a_1, a_n) \in \text{Trans}(\text{Symm}(R))$ .

In (a) oben ist

$$\text{Trans}(\text{Symm}(R)) = \text{Trans}(\{(a,b), (b,a), (b,c), (c,b)\}) = A \times A,$$

also echte Obermenge von

$$\text{Symm}(\text{Trans}(R)) = \{(a,b), (a,c), (b,a), (b,c), (c,a), (c,b)\}.$$
