# Supplementary material
Source: publisher site journal article supplement (https://www.degruyterbrill.com/publication/isbn/9783111336107/downloadAsset/9783111336107_L%C3%B6sungen.zip)
Supplement: Supplementary file 3 [file Lsungen_Kapitel 4.pdf › Lsungen_Kapitel 4.pdf]

# **Lösungen der Übungsaufgaben in Diskrete Mathematik kompakt (Bernd Baumgarten, De Gruyter, 2024) – Kapitel 4: Logik –**

Bitte beachten Sie:

- Versuchen Sie stets, die Aufgabe zunächst selbst zu lösen! Das Anschauen einer gelösten Übungsaufgabe *ohne vorherigen eigenen ernsthaften Bearbeitungsversuch* nützt Ihnen hinsichtlich des Lernerfolgs oft nicht mehr als der Genuss einer Tasse Kaffee: Es erzeugt einfach nur vorübergehend ein angenehmes Gefühl, hinterlässt aber keinen bleibenden Effekt.
- Zu jeder Aufgabe kann es verschiedene korrekte Lösungen bzw. Lösungswege und für jede Lösung mehrere Schreibweisen geben. Daher sind die in der Folge vorgestellten Lösungen durchweg nur als Beispiele zu verstehen.
- Zusätzliche Erklärungen stehen in eckigen Klammern [ ... ].
- Auch in Übungsaufgaben können Fehler stecken. Bitte beachten Sie die eventuelle Korrigenda-Datei des Verlages.

## **4.1 Beispiele und Gegenbeispiele zu AL-Formeln**

(c) und (f) sind vorschriftsmäßig.

[(a) Ein Junktore fehlt.

(b) Die Negation sollte nicht eingeklammert sein, also eine öffnende Klammer zu viel.

(d) Auf inoffiziell geduldete Weise sind die äußersten Klammern weggelassen.

(e) Eine schließende Klammer fehlt.]

## 4.2 Syntaxbaum einer AL-Formel

- a) *Syntaxbaum* wird wie folgt ausgeführt:  
Baue einen neuen Baum bestehend aus einer Wurzel ohne Inschrift.  
Lies das nächste Zeichen.  
Ist es  $\neg$ , dann  
    schreibe es in die Wurzel,  
    führe eine (neue, untergeordnete) *Syntaxbaum*-Berechnung aus  
        [Es gibt meist mehrere gleichzeitig offene *Syntaxbaum*-Berechnungen in  
        einer Aufruf-Hierarchie.],  
    hänge den davon erzeugten Baum als einziges Kind an die Wurzel, und  
    beende diese Ausführung von *Syntaxbaum*.  
Ist es  $($ , dann  
    führe eine (neue, untergeordnete) *Syntaxbaum*-Berechnung aus,  
    hänge den davon erzeugten Baum als erstes Kind an die Wurzel,  
    lies das nächste Zeichen [Es muss ein Junktorein sein.] und  
    schreibe es in die Wurzel,  
    führe eine (neue, untergeordnete) *Syntaxbaum*-Berechnung aus,  
    hänge den davon erzeugten Baum als zweites Kind an die Wurzel,  
    lies das nächste Zeichen [Es muss  $)$  sein.] und  
    beende diese Ausführung von *Syntaxbaum*.  
Schreibe das Zeichen in die Wurzel. [Es muss, wenn der Algorithmus hier ankommt,  
eine Aussagevariable sein.]  
Beende diese Ausführung von *Syntaxbaum*.  
Das *Syntaxbaum*-Ergebnis von  $(A \wedge (\neg B \vee C)) \rightarrow D$  steht in Abb. 4.1 rechts.  
[Die Hierarchie der *Syntaxbaum*-Berechnungen hat die gleiche Form.]
- b) Alle Aussagevariablen  $A_1, A_2, \dots$  sind Formeln.  
Sind  $\varphi$  und  $\psi$  Formeln, dann sind auch,  $\neg\varphi$ ,  $\varphi \wedge \psi$ ,  $\varphi \vee \psi$ ,  $\varphi \rightarrow \psi$  und  $\varphi \leftrightarrow \psi$  und  
Formeln. [Dies ergibt die sog. polnische Notation, vgl. 6.7.2.]
- c) Man legt in Gedanken die linke Hand an die Wurzel des Baumes und umrundet ihn  
unter ständiger Berührung. Dabei notiert man jeden Knoten bei der ersten Begegnung.  
[Im obigen Beispiel erhält man korrekt  $\rightarrow \wedge A \vee \neg BCD$ .]

## 4.3 AL-Formel-Eigenschaften

- a) Jede Formel  $A_1, A_2, \dots$  enthält mindestens eine Aussagevariable.  
Enthalten die Formeln  $\varphi$  und  $\psi$  mindestens je eine Aussagevariable, dann auch  $\neg\varphi$ ,  
 $(\varphi \wedge \psi)$ ,  $(\varphi \vee \psi)$ ,  $(\varphi \rightarrow \psi)$  und  $(\varphi \leftrightarrow \psi)$ .
- b) Jede Formel  $A_1, A_2, \dots$  beginnt *nicht* mit einer schließenden Klammer  $)$ .  
Beginnen weder die Formeln  $\varphi$  und  $\psi$  mit  $)$  [was aber gar nicht benutzt wird], so  
beginnt weder  $\neg\varphi$  noch  $(\varphi \wedge \psi)$ ,  $(\varphi \vee \psi)$ ,  $(\varphi \rightarrow \psi)$  oder  $(\varphi \leftrightarrow \psi)$  mit  $)$ .

#### 4.4 Wörter über dem Alphabet der Aussagenlogik

Empfohlene Beispiele, jeweils mögliche Wirkung der [nichtdeterministischen] Algorith-  
musschritte auf  $w$  und [deterministisches] Endergebnis:

- (i)  $(\neg(A \wedge \neg\neg B) \rightarrow \neg C) \rightarrow (\neg(x \wedge \neg\neg x) \rightarrow \neg x) \rightarrow (\neg(x \wedge \neg x) \rightarrow x) \rightarrow$   
 $(\neg(x \wedge x) \rightarrow x) \rightarrow (\neg x \rightarrow x) \rightarrow (x \rightarrow x) \rightarrow x \rightarrow \boxed{\text{JA}}$
- (ii)  $(\neg(A \wedge (\neg)B \rightarrow \neg C) \rightarrow (\neg(x \wedge (\neg)x \rightarrow \neg x) \rightarrow (\neg(x \wedge (\neg)x \rightarrow x) \rightarrow \boxed{\text{NEIN}}$

Antworten auf die Fragen:

- Der Algorithmus entscheidet, ob die Zeichenfolge eine AL-Formel ist.
- Er beruht auf Satz 4.4, der Teilwort-Teilformel-Eigenschaft der AL-Formeln.

#### 4.5 Rekursiv definierte Funktionen auf ALForm

- a) Für jede Formel  $A_1, A_2, \dots$  :  $\text{Grad}(A_i) := 0$  .  
 Für jede Formel  $\varphi$  :  $\text{Grad}(\neg\varphi) := \text{Grad}(\varphi) + 1$  .  
 Für jeden zweistellige Junktor  $\otimes$  und alle Formeln  $\varphi$  und  $\psi$  :  
 $\text{Grad}((\varphi \otimes \psi)) := \text{Grad}(\varphi) + \text{Grad}(\psi)$  .
- b) Für jede Formel  $A_1, A_2, \dots$  :  $\text{Tiefe}(A_i) := 0$  .  
 Für jede Formel  $\varphi$  :  $\text{Tiefe}(\neg\varphi) := \text{Tiefe}(\varphi) + 1$  .  
 Für jeden zweistellige Junktor  $\otimes$  und alle Formeln  $\varphi$  und  $\psi$  :  
 $\text{Tiefe} \dots ((\varphi \otimes \psi)) := \max(\text{Tiefe}(\varphi), \text{Tiefe}(\psi)) + 1$  .
- c) Das Ergebnis ist die Anzahl
- der öffnenden Klammern bzw.
  - der schließenden Klammern bzw.
  - der zweistelligen Junktoren
- in der Formel. [Diese drei Anzahlen sind gleich.]

## 4.6 Teilformel-Relation

a) Wir sollen also zeigen:

Für alle  $\varphi \in \text{ALForm}$  gilt:  $(\#) \varphi \in \text{Teilf}(\varphi)$ .

Laut der Definition von  $\text{Teilf}$ :

- Wegen  $\text{Teilf}(P) := \{P\}$  gilt  $(\#)$  für alle Aussagevariablen  $P$ .
- Wegen  $\text{Teilf}(\neg\varphi) := \text{Teilf}(\varphi) \cup \{\neg\varphi\}$  gilt (A) für alle Negationen von AL-Formeln, für die  $(\#)$  gilt.
- Wegen  $\text{Teilf}(\varphi \otimes \psi) := \text{Teilf}(\varphi) \cup \text{Teilf}(\psi) \cup \{\varphi \otimes \psi\}$  gilt  $(\#)$  für alle im letzten Schritt mit einem zweistelligem Junktor  $\otimes = \wedge, \vee, \rightarrow$  oder  $\leftrightarrow$  gebildeten AL-Formeln, deren Teilformeln  $(\#)$  erfüllen.

Also gilt  $(\#)$  für alle AL-Formeln wegen ihres induktiven Aufbaus.

b) Wir zeigen per Induktion: Für alle  $\varphi, \psi, \pi \in \text{ALForm}$  gilt:

$\varphi \in \text{Teilf}(\psi)$  und  $\psi \in \text{Teilf}(\pi) \Rightarrow \varphi \in \text{Teilf}(\pi)$ , bzw. kürzer

Für alle  $\pi \in \text{ALForm}$  gilt:

$(\circ) \text{Teilf}_{\{\}}(\text{Teilf}(\pi)) = \text{Teilf}(\pi)$ . [links: die Vereinigung aller  $\text{Teilf}(\psi)$ ,  $\psi \in \text{Teilf}(\pi)$ ]

Laut der Definition von  $\text{Teilf}$ :

- Wegen  $\text{Teilf}(P) := \{P\}$  gilt  $(\circ)$  für alle Aussagevariablen  $P$ .
- Gilt nun  $(\circ)$  für  $\varphi$ , so gilt es auch für  $\neg\varphi$ , denn

$$\begin{aligned} \text{Teilf}_{\{\}}(\text{Teilf}(\neg\varphi)) &= \text{Teilf}_{\{\}}(\text{Teilf}(\varphi) \cup \text{Teilf}(\neg\varphi)) = \text{Teilf}(\varphi) \cup \text{Teilf}(\neg\varphi) \\ &= \text{Teilf}(\varphi) \cup \text{Teilf}(\neg\varphi) = \text{Teilf}(\varphi). \end{aligned}$$

[gemäß Definition:  $\text{Teilf}(\varphi) \subseteq \text{Teilf}(\neg\varphi)$ ]

- Analog folgt  $(\circ)$  leicht für  $(\varphi \otimes \psi)$ , wenn es für  $\varphi$  und  $\psi$  gilt.

c) Per Induktion zeigt man leicht:

- Jede Teilformel einer AL-Formel  $\varphi$  hat höchstens so viele Zeichen wie  $\varphi$ .
- Die einzige Teilformel einer AL-Formel  $\varphi$ , die genau so viele Symbole wie  $\varphi$  hat, ist  $\varphi$  selbst.

Ist nun  $\varphi \in \text{Teilf}(\psi)$  und  $\psi \in \text{Teilf}(\varphi)$ , so sind beide Teilformeln voneinander, haben also von gleich viele Symbole, sind also identisch.

## 4.7 Teilformel-Relation

- Für jede AL-Formel  $\varphi$  gilt  $\varphi \in \text{Super}(\varphi)$ .
- Für jede AL-Formel  $\psi \in \text{Super}(\varphi)$  gilt:  $\neg\psi \in \text{Super}(\varphi)$ .
- Für je zwei AL-Formeln  $\psi$  und  $\pi$ , von denen mindestens eine ein Element von  $\text{Super}(\varphi)$  ist, gilt:  
Für jeden Junktor  $\otimes = \wedge, \vee, \rightarrow$  oder  $\leftrightarrow$  gilt:  $\psi \otimes \pi \in \text{Super}(\varphi)$ .

[Nun gilt  $\varphi \in \text{Teilf}(\psi)$  genau dann wenn  $\psi \in \text{Super}(\varphi)$  gilt.]

#### 4.8 Wahrheitswerteverlauf, Wahrheitstafel

a)

| $A$ | $B$ | $A \rightarrow B$ | $\neg B$ | $(\neg B \wedge A)$ | $(A \rightarrow B) \vee (\neg B \wedge A)$ |
|-----|-----|-------------------|----------|---------------------|--------------------------------------------|
| W   | W   | W                 | F        | F                   | W                                          |
| W   | F   | F                 | W        | W                   | W                                          |
| F   | W   | W                 | F        | F                   | W                                          |
| F   | F   | W                 | W        | F                   | W                                          |

b)

| $A$ | $B$ | $C$ | $B \vee C$ | $A \leftrightarrow (B \vee C)$ | $\neg C$ | $\neg C \wedge A$ | $(A \leftrightarrow (B \vee C)) \wedge (\neg C \wedge A)$ |
|-----|-----|-----|------------|--------------------------------|----------|-------------------|-----------------------------------------------------------|
| W   | W   | W   | W          | W                              | F        | F                 | F                                                         |
| W   | W   | F   | W          | W                              | W        | W                 | W                                                         |
| W   | F   | W   | W          | W                              | F        | F                 | F                                                         |
| W   | F   | F   | F          | F                              | W        | W                 | F                                                         |
| F   | W   | W   | W          | F                              | F        | F                 | F                                                         |
| F   | W   | F   | W          | F                              | W        | F                 | F                                                         |
| F   | F   | W   | W          | F                              | F        | F                 | F                                                         |
| F   | F   | F   | F          | W                              | W        | F                 | F                                                         |

#### 4.9 Junktoren in natürlicher Sprache

Teilsätze sind hier durch die Anfangsbuchstaben der Wörter auf offensichtliche Weise abgekürzt wiedergegeben. Erläuterungsbedürftig sind höchstens:

Erü        Es regnet übermorgen.  
TiegS     Tim ist ein guter Schwimmer.  
Kgmna    Kranke gehen meist nicht arbeiten.  
Fn        Franz nervt.  
FGn       Franzens Gesang nervt.

- |                                                             |                         |
|-------------------------------------------------------------|-------------------------|
| a) $Df \rightarrow If$                                      | f) $Erm \vee Erü$       |
| b) $If \rightarrow Df$ [ evtl. $If \leftrightarrow Df$ ]    | g) $TiegT \wedge TiegS$ |
| c) $Df \wedge (Ef \wedge If)$                               | h) $Fs \rightarrow Fn$  |
| d) $If \rightarrow Df$ [ evtl. $If \leftrightarrow Df$ ]    | i) $Fs \rightarrow FGn$ |
| e) $La \wedge Lik$ [ evtl. $(La \wedge Lik) \wedge Kgmna$ ] |                         |

- [
- Beachten Sie die sprachlichen Varianten von  $\rightarrow$  und  $\wedge$ .
  - Kausalität wird in (c) herausgefiltert, gehört nicht zur AL.
  - Gelegentlich (vgl. (b) und (d)) würde man im Alltag evtl. „fairerweise“  $\leftrightarrow$  anstatt  $\rightarrow$  als gemeint erwarten; da sind unterschiedliche Interpretationen möglich.
  - Die Existenz von Gegengründen oder ein Verstoß gegen eine Art von Gesetzmäßigkeit kann in (e) nur behelfsweise ausgedrückt werden. In der zweiten Variante ist nicht sichtbar, dass die dritte Aussage das erste  $\wedge$  kommentiert.
  - Dass der Handelnde der gleiche ist, wird kann in (g) und (h) nicht aussagenlogisch ausgedrückt werden.
  - (i) (F's Gesang nervt) ist verschieden von (h). Es könnte in (h) ja beispielsweise sein, dass F's Gesang gut ist, dass er aber beim Singen störende übertrieben theatrale Gesten macht.
- ]

#### 4.10 Semantische Formeleigenschaften und Formelrelationen

[Gelöst durch Überprüfung anhand der (zusammengelegten) Wahrheitstafeln.]

| $A$ | $B$ | $A \rightarrow B$ | $\neg A$ | $A \wedge \neg A$ | $A \wedge B$ | $B \rightarrow A$ | $(A \rightarrow B) \vee (B \rightarrow A)$ |
|-----|-----|-------------------|----------|-------------------|--------------|-------------------|--------------------------------------------|
| W   | W   | (a) W             | F        | (b) F             | (c) W        | W                 | (d) W                                      |
| W   | F   | F                 | F        | F                 | F            | W                 | W                                          |
| F   | W   | W ←               | W        | F                 | F            | F                 | W                                          |
| F   | F   | W                 | W        | F                 | F            | W                 | W                                          |

| (f)                                          |                         |          |                        |                        |       |
|----------------------------------------------|-------------------------|----------|------------------------|------------------------|-------|
| $(A \rightarrow B) \wedge (B \rightarrow A)$ | $\neg(B \rightarrow A)$ | $\neg B$ | $B \rightarrow \neg A$ | $A \rightarrow \neg B$ |       |
| W                                            | F                       | F        | F                      | F                      | (g) { |
| (e) F                                        | F                       | W        | W                      | W                      |       |
| F                                            | W                       | F        | W                      | W                      |       |
| W                                            | F                       | W        | W                      | W                      |       |

#### 4.11 Semantische Eigenschaften von Formeln

$A$  ist unten eine beliebige Aussagevariable, z.B.  $A_1$ .

- JA: [kontingent  $\Leftrightarrow$  kann je nach *bel* W und F sein  $\Leftrightarrow$  erfüllbar + widerlegbar]
- NEIN: Jede allgemeingültige AL-Formel ist Gegenbeispiel.  
[allgemeingültig  $\Rightarrow$  nicht widerlegbar  $\Rightarrow$  nicht kontingent]
- NEIN: z.B.  $A$
- NEIN: z.B.  $\{A, \neg A\} \models A \wedge \neg A$   
[und die letztere Formel ist nicht erfüllbar]
- JA: [Sie gilt unter den passenden Belegungen, die die Tautologien in der Menge  $W$  machen, also unter *sämtlichen* passenden Belegungen.]
- NEIN: z.B.  $\{A \wedge \neg A\} \models A$
- JA: [Ihre Elemente können für kein *bel* alle W sein, da noch nicht einmal einzeln.]
- JA: [kontingent  $\Rightarrow$  kann W sein; dort ist  $\neg\varphi$  dann F.]
- JA: [Keine Tautologie ist kontingent, also ist die Menge leer.  $\models \varphi \Leftrightarrow \emptyset \models \varphi$ ]
- NEIN: z.B.  $A \wedge \neg A$  [... denn die Theorie enthält *alle* Formeln, also auch  $A$  und  $\neg A$ .]
- JA: [Jede Theorie enthält alle Tautologien, also unendlich viele, z.B.  $A \vee \neg A$ ,  $A \vee A \vee \neg A$ ,  $A \vee A \vee A \vee \neg A$ .]
- JA: [Wären für  $\{\varphi_1, \dots, \varphi_n\}$  alle Formeln  $\varphi_i$  bis auf höchstens eine nicht widerlegbar, also unter allen Belegungen W, und wäre diese Ausnahme-Formel  $\varphi_k$  – wenn es sie gibt – erfüllbar, also W unter mindestens einer Belegung *bel*, dann wären unter *bel* alle Formeln W und damit wäre  $\{\varphi_1, \dots, \varphi_n\}$  eine erfüllbare Formelmeng. Daher: Gibt es keine zwei widerlegbare Formeln („ZweiWid“), dann eine unerfüllbare („EineUnerf“). Aus  $\neg\text{ZweiWid} \rightarrow \text{EineUnerf}$  folgt aber  $\text{ZweiWid} \vee \text{EineUnerf}$ .]

#### 4.12 Äquivalenz und Folgerung

Aus (1) [erster Spiegelpunkt] folgt (2) [zweiter Spiegelpunkt]:

Es gelte (1). Gilt nun  $\pi \models \varphi$ , d.h. alle Modelle von  $\pi$  sind Modelle von  $\varphi$ , dann wegen (1) (denn das besagt: gleiche Modelle von  $\varphi$  und  $\psi$ ) auch von  $\psi$ , also  $\pi \models \psi$ . Entsprechend schließt man von  $\pi \models \psi$  auf  $\pi \models \varphi$ .

Aus (2) folgt (3):

Es gelte (2). Mit  $\pi := \varphi$  folgt nun wegen  $\varphi \models \varphi$  auch  $\varphi \models \psi$ . Analog folgt mit  $\pi := \psi$   $\psi \models \varphi$  aus  $\psi \models \psi$ .

Aus (3) folgt (1):

Es gelte (3). Dann sind die Mengen der Modelle von  $\varphi$  und der von  $\psi$  sind wechselseitig Teilmengen voneinander, also identisch, und damit  $\varphi$  und  $\psi$  äquivalent.

#### 4.13 Denksportaufgabe und AL-Formeln

Teilformel für  $KeineKoll_{ijk}$  = „Keine andere Zahl  $k$  kollidiert mit der Zahl  $k$  im Feld  $i,j$ “, beispielsweise

$$\begin{aligned} KeineKoll_{112} := A_{112} \Rightarrow & \neg A_{122} \wedge \dots \wedge \neg A_{192} \wedge & \text{[keine weitere 2 in gleicher Zeile]} \\ & \neg A_{212} \wedge \dots \wedge \neg A_{912} \wedge & \text{[keine weitere 2 in gleicher Spalte]} \\ & \neg A_{222} \wedge \neg A_{232} \wedge \neg A_{322} \wedge \neg A_{332} & \text{[keine weitere 2 im Rest der Region,} \\ & & \text{nur noch notwendig für die Felder} \\ & & \text{außerhalb der gegebenen Zeile und Spalte]} \end{aligned}$$

Insgesamt ist zu fordern:  $KeineKoll_{111} \wedge KeineKoll_{112} \wedge \dots \wedge KeineKoll_{999}$ .

#### 4.14 Denksportaufgabe und Paradoxon

- a) Seien  $A, B, C$ : Alina, Belinda, bzw. Celine sagt in ihrer Aussage die Wahrheit, also  
 also  $\neg A, \neg B, \neg C$ : Alina, Belinda, bzw. Celine lügt in ihrer Aussage.

Die drei gegebenen Fakten bedeuten dann  $(A \leftrightarrow (\neg B \wedge \neg C)), B \leftrightarrow \neg A$  und  $C \leftrightarrow A$ .  
 Gesucht ist die (hoffentlich einzige) Belegung von  $A, B, C$ , die alle drei Fakten wahr macht.  
 Mit der Wahrheitstafel ergibt sich, s.u.: Belinda sagt die Wahrheit; Alina und Celine lügen.

| A        | B        | C        | $\neg B$ | $\neg C$ | $\neg B \wedge \neg C$ | $A \leftrightarrow \dots$ | $\neg A$ | $B \leftrightarrow \neg A$ | $C \leftrightarrow A$ |
|----------|----------|----------|----------|----------|------------------------|---------------------------|----------|----------------------------|-----------------------|
| W        | W        | W        | F        | F        | F                      | F                         | F        | F                          | W                     |
| W        | W        | F        | F        | W        | F                      | F                         | F        | F                          | F                     |
| W        | F        | W        | W        | F        | F                      | F                         | F        | W                          | W                     |
| W        | F        | F        | W        | W        | W                      | W                         | F        | W                          | F                     |
| F        | W        | W        | F        | F        | F                      | W                         | W        | W                          | F                     |
| <b>F</b> | <b>W</b> | <b>F</b> | F        | W        | F                      | <b>W</b>                  | W        | <b>W</b>                   | <b>W</b>              |
| F        | F        | W        | W        | F        | F                      | W                         | W        | F                          | F                     |
| F        | F        | F        | W        | W        | W                      | F                         | W        | F                          | W                     |

- b) i) Mit der gleichen Methode stellt sich heraus, dass *keine Belegung* die Wissensbasis  $A \leftrightarrow \neg B, B \leftrightarrow \neg C$  und  $C \leftrightarrow \neg A$  erfüllt. Man kann das nicht damit abtun, dann hätten halt alle gelogen, denn dann müsste die Belegung  $A, B, C \mapsto F$  die Wissensbasis erfüllen. Mindestens einige der Aussagen sind also *weder wahr noch gelogen*, sondern *unsinnig*, und (i) lässt sich nicht beantworten, da die Frage die Sinnhaftigkeit der Aussagen voraussetzt.
- ii) Dieses Problem tritt immer dann auf, wenn sich Aussagen auf sich selbst beziehen, sei es auch *zyklisch* über andere Aussagen als Zwischenstationen. Das passiert nicht, wenn man höchstens über früher gemachte Aussagen spricht, aber nicht über gegenwärtige oder zukünftige. Der Aufgabenteil (a) war ein Glücksfall, bei dem es gerade mal gut geht.

[ Das bekannteste Beispiel der Art (ii) ist das Lügnerparadoxon „Ich lüge immer.“ (oder „Ich lüge eben gerade.“, oder ein Kreter sagt: „Alle Kreter lügen immer.“ usw.). Wäre der Satz sinnvoll, dann wäre er genau dann wahr wenn er falsch wäre.

Versuchen Sie eine Variante mit Alina, Belinda und Celine zu erfinden, bei der genau *zwei verschiedene* Belegungen Modelle sind. Dann könnten also einige der Aussagen *sowohl wahr als auch gelogen* sein. Sagt eine Person „Ich sage gerade die Wahrheit“ ( $A$ ), haben wir bereits den gleichen Effekt: Die Wissensbasis  $A \leftrightarrow A$  ist mit *beiden* möglichen Belegungen von  $A$  erfüllt; die Person kann sowohl gelogen als auch die Wahrheit gesagt haben!

Beurteilen Sie nun unter diesen Aspekten den logischen Nutzen von juristisch empfohlenen Aussagen wie „Die folgende Erklärung gebe ich im Vollbesitz meiner geistigen Kräfte, freiwillig und ohne Zwang ab.“ ]



#### 4.15 Folgerungen aus Formelmengen

a) ... mit kombinierter gewöhnlicher Wahrheitstafel; die Formelmenge wird  $M$  genannt:

| A | B | $A \vee B$ | $B \rightarrow A$ | Wo $\models M$ ? | Dort $\models A$ ? |
|---|---|------------|-------------------|------------------|--------------------|
| W | W | W          | W                 | hier             | ja                 |
| W | F | W          | W                 | hier             | ja                 |
| F | W | W          | F                 |                  |                    |
| F | F | F          | W                 |                  |                    |

Die Folgerung ist korrekt.

b) ... aus Platzgründen mit kombinierter In-situ-Wahrheitstafel; die (erhoffte) Folge sei  $\varphi$ ; die Formelmenge wird  $M$  genannt:

| (A | $\vee$ | B) | $\rightarrow$ | A | A | $\rightarrow$ | (A | $\vee$ | B) | $\neg$ | (A | $\wedge$ | $\neg$ | B) | $\models M$ ? | $\models \varphi$ ? |
|----|--------|----|---------------|---|---|---------------|----|--------|----|--------|----|----------|--------|----|---------------|---------------------|
| W  | W      | W  | W             | W | W | W             | W  | W      | W  | W      | W  | F        | F      | W  | hier          | ja                  |
| W  | W      | F  | W             | W | W | W             | W  | W      | F  | F      | W  | W        | W      | F  | hier          | nein!               |
| F  | W      | W  | F             | F | F | W             | F  | W      | W  | W      | F  | F        | F      | W  |               |                     |
| F  | F      | F  | W             | F | F | W             | F  | F      | F  | W      | F  | F        | W      | F  | hier          | ja                  |

Die (erhoffte) Folgerung ist inkorrekt.

#### 4.16 Substitution

Vervollständigung des Tipps: ... zum Beispiel „ $c := b$ ;  $b := a$ ;  $a := c$ “. [Wichtig ist, dass  $c$  von  $a$  und  $b$  (und am besten von allen irgendwo im Programm verwendeten Variablen) verschieden ist, damit keine unerwünschte Wechselwirkung eintritt.]

Um die Substitution  $[P_1/\varphi_1, P_2/\varphi_2, \dots, P_k/\varphi_k]$  zu „sequentialisieren“, wählt man  $k$  unterschiedliche Aussagevariablen  $Q_i$ ,  $i=1, \dots, k$ , die in

$$V := \text{Vars}(\tau) \cup \{P_1, P_2, \dots, P_k\} \cup \text{Vars}(\tau) \cup \text{Vars}(\varphi_1) \cup \text{Vars}(\varphi_2) \cup \dots \cup \text{Vars}(\varphi_n)$$

nicht vorkommen, und substituiert nacheinander einzeln

$$P_1/Q_1, P_2/Q_2, \dots \text{ bis zu } P_k/Q_k \text{ und dann } Q_1/\varphi_1, Q_2/\varphi_2, \dots \text{ bis zu } Q_k/\varphi_k.$$

[Die oben beschriebene Auswahl der  $Q_i$ ,  $i=1, \dots, k$ , ist möglich, da  $V$  endlich ist und deshalb  $m := \max(\{i \in \mathbb{N} \mid A_i \in V\})$  existiert. Dann wählen wir z.B.  $Q_i := A_{m+i}$ .

Die Wahl der  $Q_i$  schließt Wechselwirkungen zwischen den einzelnen Substitutionen aus.

Man beachte, dass die Wahl der Einzelsubstitutionen von  $\tau$  abhängt. ]

#### 4.17 Substitution

Zunächst folgt aus dem Deduktionstheorem (Satz 4.8) mit  $M := \emptyset$  und  $\models \psi \Leftrightarrow \emptyset \models \psi$ , dass  $\varphi \models \psi \Leftrightarrow \models (\varphi \rightarrow \psi)$ , und analog, dass  $\psi \models \varphi \Leftrightarrow \models (\psi \rightarrow \varphi)$  gilt. Insgesamt folgt für beliebige AL-Formeln  $\sigma$  und  $\tau$ , dass  $\sigma \equiv \tau \Leftrightarrow \models (\sigma \leftrightarrow \tau)$ .

Die Substitution  $P_1/\varphi_1, P_2/\varphi_2, \dots, P_k/\varphi_k$  nennen wir kurz  $sub$ .

$$\begin{aligned}
 \sigma \equiv \tau &\Leftrightarrow \models (\sigma \leftrightarrow \tau) && \text{wegen des Deduktionstheorems, s.o.} \\
 &\Rightarrow \models (\sigma \leftrightarrow \tau)_{sub} && \text{wegen des Substitutionstheorems, Satz 4.10} \\
 &\Rightarrow \models (\sigma_{sub} \leftrightarrow \tau_{sub}) && \text{wegen der Definition der Substitution} \\
 &\Leftrightarrow \sigma_{sub} \equiv \tau_{sub} && \text{wegen des Deduktionstheorems, s.o.}
 \end{aligned}$$

#### 4.18 Ersetzung

- a)  $Ers_{[\psi/\rho]}(\varphi) := \{\varphi\} \cup$
- |             |                                        |      |                                                                                                              |
|-------------|----------------------------------------|------|--------------------------------------------------------------------------------------------------------------|
| IF          | $\varphi = \psi$                       | THEN | $\{\rho\}$                                                                                                   |
| ELSE IF     | $\varphi = \neg\sigma$                 | THEN | $\{\neg\tau \mid \tau \in Ers_{[\psi/\rho]}(\sigma)\}$                                                       |
| ELSE IF     | $\varphi = \varphi_1 \wedge \varphi_2$ | THEN | $\{\sigma \wedge \tau \mid \sigma \in Ers_{[\psi/\rho]}(\varphi_1), \tau \in Ers_{[\psi/\rho]}(\varphi_2)\}$ |
| ELSE IF ... |                                        |      | [analog für $\vee, \rightarrow, \leftrightarrow$ ]                                                           |
| ELSE        |                                        |      | $\emptyset$                                                                                                  |

- b)  $n$ -malige Anwendung des Deduktionstheorems ergibt  
 $\{\varphi_1, \varphi_2, \dots, \varphi_n\} \models \psi \Leftrightarrow \vdash (\varphi_1 \rightarrow (\varphi_2 \rightarrow \dots \rightarrow (\varphi_n \rightarrow \psi)))$ .  
 Nun ist  $A \rightarrow (B \rightarrow C) \equiv (A \wedge B) \rightarrow C$ .  
 $n$ -malige Anwendung des Substitutions- und des Ersetzungssatzes liefert ...  
 $\varphi_1 \rightarrow (\varphi_2 \rightarrow \dots \rightarrow (\varphi_n \rightarrow \psi)) \equiv (\varphi_1 \wedge \varphi_2 \wedge \dots \wedge \varphi_n) \rightarrow \psi$  und damit  
 $\vdash (\varphi_1 \rightarrow (\varphi_2 \rightarrow \dots \rightarrow (\varphi_n \rightarrow \psi))) \Leftrightarrow \vdash (\varphi_1 \wedge \varphi_2 \wedge \dots \wedge \varphi_n) \rightarrow \psi$

#### 4.19 Substitution und Ersetzung

- a) Allgemeingültig sind (also „ $\models$ “, gezeigt jeweils unter Verwendung des Ersetzungstheorems):  
 Peirces Gesetz mit  $A$  für  $P$ ,  $B$  für  $Q$ :  $((A \rightarrow B) \rightarrow A) \rightarrow A$ ,  
 mit Kontraposition für äußerste Implikation:  $\neg A \rightarrow \neg((A \rightarrow B) \rightarrow A)$ ,  
 mit Implikationsauflösung bei  $A \rightarrow B$ :  $\neg A \rightarrow \neg((\neg A \vee B) \rightarrow A)$ .
- b) Äquivalent sind (jeweils wegen des Ersetzungstheorems):  
 $A \wedge (B \wedge C)$ ,  
 mit Kommutativität  $A \wedge (C \wedge B)$ ,  
 mit Assoziativität  $(A \wedge C) \wedge B$ ,  
 mit Kommutativität  $(C \wedge A) \wedge B$ .
- c) Äquivalent sind (zunächst wegen Tautologie- und Kontradiktionsabsorption, mit  $A$  für  $P$  und  $B$  für  $Q$ , sowie mit Transitivität von  $\equiv$ ):  
 $A \wedge (B \vee \neg B)$ ,  $A$  und  $A \vee (B \wedge \neg B)$ ,  
 mit Kommutativität bzw. Doppelnegation  $A \wedge (\neg B \vee B)$  und  $A \vee (\neg\neg B \wedge \neg B)$ ,  
 mit Implikationsauflösung bzw. de Morgan  $A \wedge (B \rightarrow B)$  und  $A \vee \neg(\neg B \vee B)$ ,  
 schließlich mit Implikationsauflösung rechts  $A \vee \neg(B \rightarrow B)$ .
- c) Tertium non datur  $P \vee \neg P$  und Substitution  $[P / A \rightarrow (B \rightarrow \neg C)]$  ergeben die Aussage.

#### 4.20 Junktorenbasen

- a.i)  $\neg A \equiv A \uparrow A$   
 a.ii)  $\neg A \equiv A \downarrow A$   
 b.i)  $A \wedge B \equiv (A \uparrow B) \uparrow (A \uparrow B)$   
 b.ii)  $A \wedge B \equiv (A \downarrow A) \downarrow (B \downarrow B)$   
 c.i)  $A \vee B \equiv (A \uparrow A) \uparrow (B \uparrow B)$   
 c.ii)  $A \vee B \equiv (A \downarrow B) \downarrow (A \downarrow B)$

## 4.21 Junktorenbasen

Expansion nach  $A$ :

$$(B \rightarrow A) \wedge (A \vee B) \equiv A \rightarrow ((B \rightarrow \top) \wedge (\top \vee B)) / ((B \rightarrow \perp) \wedge (\perp \vee B))$$

dann Expansion nach  $B$ :

$$\begin{aligned} &\equiv B \rightarrow [A \rightarrow ((\top \rightarrow \top) \wedge (\top \vee \top)) / ((\top \rightarrow \perp) \wedge (\perp \vee \top))] \\ &\quad / [A \rightarrow ((\perp \rightarrow \top) \wedge (\top \vee \perp)) / ((\perp \rightarrow \perp) \wedge (\perp \vee \perp))] \end{aligned}$$

schließlich Auswertung der konstanten Teilformeln:

$$\equiv B \rightarrow [A \rightarrow \top / \perp] / [A \rightarrow \top / \perp]$$

[Zwei kürzere äquivalente ITE-Formeln sind  $[A \rightarrow \top / \perp]$  und  $A$ .]

## 4.22 Junktorenbasen

Sei für eine AL-Formel  $\varphi$  (#) die Eigenschaft:  $\varphi_{[A_i / \neg A_i]} \equiv \varphi$  oder  $\varphi_{[A_i / \neg A_i]} \equiv \neg \varphi$ .

Der induktive Aufbau der  $\{\leftrightarrow, \neg\}$ -Formeln ist klar:

wie der *aller* AL-Formeln, aber die Induktionsschritte für die Junktoren  $\wedge, \vee$  und  $\rightarrow$  entfallen.

Beweis der gewünschten Aussage (#) für alle  $\{\leftrightarrow, \neg\}$ -Formeln per Induktion über den Formelaufbau:

- (i) (#) gilt für  $A_1, A_2, A_3, \dots$ , denn mit der Substitution  $A_i / \neg A_i$  wird  $A_i$  zu  $\neg A_i$ , und ansonsten ( $k \neq i$ ) bleibt  $A_k$  unverändert  $A_k$ .
- (ii-a) Sei  $\varphi$   $\{\leftrightarrow, \neg\}$ -Formel mit (#) und  $i$  aus  $1, 2, \dots$ . Dann ist  $(\neg \varphi)_{[A_i / \neg A_i]} = \neg(\varphi_{[A_i / \neg A_i]})$ , und das ist wegen (#)  $\equiv \neg \varphi$  oder  $\equiv \neg(\neg \varphi) \equiv \varphi$ .
- (ii-b) Sei  $\varphi$  und  $\psi$   $\{\leftrightarrow, \neg\}$ -Formeln mit (A) und  $i$  aus  $1, 2, \dots$ . Dann ist  $(\varphi \leftrightarrow \psi)_{[A_i / \neg A_i]} = \varphi_{[A_i / \neg A_i]} \leftrightarrow \psi_{[A_i / \neg A_i]}$ , und das ist wegen (#) ...  $\equiv (\varphi \leftrightarrow \psi)$  oder  $\equiv (\neg \varphi \leftrightarrow \psi)$  oder  $\equiv (\varphi \leftrightarrow \neg \psi)$  oder  $\equiv (\neg \varphi \leftrightarrow \neg \psi)$ ; und somit  $\equiv (\varphi \leftrightarrow \psi)$  oder  $\equiv \neg(\varphi \leftrightarrow \psi)$

(#) bleibt beim Übergang zu äquivalenten Formeln erhalten:

Seien  $\varphi$  und  $\psi$  AL-Formeln, es gelte (#) für  $\varphi$  und ferner sei  $\varphi \equiv \psi$ . Wir betrachten nun die Belegungen auf  $\text{Vars}(\varphi) \cup \text{Vars}(\psi)$ . Darunter hat  $\psi_{[A_i / \neg A_i]}$  die Modelle „ $M_{[A_i / \neg A_i]}$ “, wobei  $M$  die Modelle von  $\psi$  durchläuft, und sich  $M_{[A_i / \neg A_i]}$  und  $M$  durch gegenteilige  $A_i$ -Werte unterscheiden. Wegen  $\varphi \equiv \psi$  durchläuft  $M$  auch die Modelle von  $\varphi$ , also  $M_{[A_i / \neg A_i]}$  auch die Modelle von  $\varphi_{[A_i / \neg A_i]}$ . Also haben  $\psi_{[A_i / \neg A_i]}$  und  $\varphi_{[A_i / \neg A_i]}$  dieselben Modelle, sind also zu  $\varphi$  oder  $\neg \varphi$  äquivalent, also auch zu  $\psi$  oder  $\neg \psi$ . Also gilt (A) für  $\psi$ .

Wäre nun  $A_1 \rightarrow A_2$  zu einer  $\{\leftrightarrow, \neg\}$ -Formel äquivalent, hätte es die Eigenschaft (#). Wahrheitstabellen zeigen sofort, dass weder  $\neg A_1 \rightarrow A_2 \equiv A_1 \rightarrow A_2$  noch  $\neg A_1 \rightarrow A_2 \equiv \neg(A_1 \rightarrow A_2)$  gilt.

### 4.23 Dualität

a) Erstes Verfahren:

Zu  $\varphi$  mit  $\text{Vars}(\varphi) = \{P_1, \dots, P_k\}$  ist stets  $\psi := \neg \varphi_{[P_1 / \neg P_1, \dots, P_k / \neg P_k]}$  dual.

Sei  $\psi'$  die Formel  $\varphi_{[P_1 / \neg P_1, \dots, P_k / \neg P_k]}$ , so dass  $\psi := \neg \psi'$ .

Sei  $bel$  eine passende Belegung für  $\varphi$  bzw.  $\psi$  bzw.  $\psi'$ . Wird  $\psi'$  unter  $\neg bel$  ausgewertet, so erhält jedes  $P_i$  den entgegengesetzten Wert wie unter  $bel$ . Vor dem  $P_i$  steht aber ein Negationszeichen, und die Formel  $\neg P_i$  erhält nun denselben Wert, den in der Auswertung von  $\varphi$  unter  $bel$  das  $P_i$  erhält. Darüber sind die Syntaxbäume von  $\varphi$  bzw.  $\psi'$  aber identisch, so dass  $\varphi$  unter  $bel$  und  $\psi'$  unter  $\neg bel$  den gleichen Wahrheitswert erhalten, so dass schließlich  $\psi$ , also  $\neg \psi'$ , unter  $\neg bel$  den zu  $\varphi$  unter  $bel$  entgegengesetzten Wahrheitswert erhält.

Auch ein induktiver Beweis im Stile von (b) unten ist möglich.

b) Zweites Verfahren:  $\varphi$  wird äquivalent als  $\psi$  in der Junktorenbasis  $\{\neg, \wedge, \vee\}$  ausgedrückt. In  $\psi$  wird nun jede Konjunktion durch eine Disjunktion ersetzt und umgekehrt, die  $\wedge$  und  $\vee$  also gegeneinander ausgetauscht. Das Ergebnis sei die Formel  $\psi_d$ . Behauptung:  $\psi_d$  ist dual zu  $\psi$  (und damit zu  $\varphi$ ).

Induktiver Beweis für Formeln über der Junktorenbasis  $\{\neg, \wedge, \vee\}$ :

Vier Fälle sind zu untersuchen, einer für den Induktionsanfang, drei für die Induktionsschritte:

i) Ist  $\psi$  eine Aussagevariable  $A_i$ , so ist es identisch mit  $\psi_d$ , und wenn  $\psi_d$   $[=\psi = A_i]$  unter  $\neg bel$  ausgewertet wird, hat es den entgegengesetzten Wahrheitswert wie  $\psi$   $[=\psi_d = A_i]$  unter  $bel$ .

ii.a) Ist  $\psi = \neg \pi$  und  $\pi_d \odot \pi$ , so gilt auch wegen der Definitionen von  $\pi_d$  und  $\odot$

$$\begin{aligned} \psi_d &= \neg \pi_d \text{ und } \text{wert}_{bel}(\pi) = g(\text{wert}_{\neg bel}(\pi_d)) \text{ . Es folgt} \\ \text{wert}_{\neg bel}(\psi_d) &= \text{wert}_{\neg bel}(\neg \pi_d) = g(\text{wert}_{bel}(\pi_d)) \\ &= \text{wert}_{bel}(\pi) = g(\text{wert}_{bel}(\neg \pi)) = g(\text{wert}_{bel}(\psi)) \end{aligned}$$

(und zwar der Reihe nach wegen  $\psi_d = \neg \pi_d$ , Definition von  $g$ , Dualität  $\pi_d / \pi$ , Definition von  $g$ ,  $\psi = \neg \pi$ ).

ii.b) Ist  $\psi = \pi_1 \wedge \pi_2$ ,  $\pi_{1d} \odot \pi_1$  und  $\pi_{2d} \odot \pi_2$ , also  $\text{wert}_{bel}(\pi_i) = g(\text{wert}_{\neg bel}(\pi_i)_d)$

und  $\text{wert}_{\neg bel}((\pi_i)_d) = g(\text{wert}_{bel}(\pi_i)) = \text{wert}_{bel}(\neg \pi_i)$ , so gilt mit  $F < W$

$$\begin{aligned} \text{wert}_{\neg bel}(\psi_d) &= \text{wert}_{\neg bel}((\pi_1 \wedge \pi_2)_d) = \text{wert}_{\neg bel}(\pi_{1d} \vee \pi_{2d}) \\ &= \max(\text{wert}_{\neg bel}(\pi_{1d}), \text{wert}_{\neg bel}(\pi_{2d})) \\ &= \max(\text{wert}_{bel}(\neg \pi_1), \text{wert}_{bel}(\neg \pi_2)) \\ &= \text{wert}_{bel}(\neg \pi_1 \vee \neg \pi_2) = \text{wert}_{bel}(\neg(\pi_1 \wedge \pi_2)) \\ &= g(\text{wert}_{bel}(\pi_1 \wedge \pi_2)) = g(\text{wert}_{bel}(\psi)) \end{aligned}$$

(und zwar der Reihe nach wegen der Definition von  $\psi$ , der des  $d$ -Indexes, der  $\vee$ -Semantik, der Dualitätsannahmen  $\pi_{1d} \odot \pi_1$  und  $\pi_{2d} \odot \pi_2$ , der  $\vee$ -Semantik, der De Morgan'schen Regeln, der Definition von  $g$  und der von  $\psi$ ).

ii.c) Ist  $\psi = \pi_1 \vee \pi_2$  und  $(\pi_i)_d \odot \pi_i$ , folgt  $\text{wert}_{\neg bel}(\psi_d) = g(\text{wert}_{bel}(\psi))$  ganz analog zu (ii.b).

#### 4.24 Konjunktive Normalform

- a) nein [Die 2. Klausel enthält kein Paar  $P, \neg P$  und ist F unter  $bel(A) = bel(B) = F$ ]
- b) nein [Die zweite, leere Klausel enthält kein Paar  $P, \neg P$ , und ist sogar stets F.]
- c) ja [Alle Klauseln ein enthalten Paar  $P, \neg P$ .]

#### 4.25 Konjunktive Normalform

- a) Algorithmus 4.1 (in Abschnitt 4.1.9) ergibt wie unten gezeigt die blau unterlegte Lösung mit sieben Klauseln à drei Literalen.

| A | B | C | $B \vee C$ | $A \rightarrow (B \vee C)$ | $\neg(A \rightarrow (B \vee C))$ |                                           |
|---|---|---|------------|----------------------------|----------------------------------|-------------------------------------------|
| W | W | W | W          | W                          | F                                | $(\neg A \vee \neg B \vee \neg C) \wedge$ |
| W | W | F | W          | W                          | F                                | $(\neg A \vee \neg B \vee C) \wedge$      |
| W | F | W | W          | W                          | F                                | $(\neg A \vee B \vee \neg C) \wedge$      |
| W | F | F | F          | F                          | W                                | $A \wedge \neg B \wedge \neg C$           |
| F | W | W | W          | W                          | F                                | $(A \vee \neg B \vee \neg C) \wedge$      |
| F | W | F | W          | W                          | F                                | $(A \vee \neg B \vee C) \wedge$           |
| F | F | W | W          | W                          | F                                | $(A \vee B \vee \neg C) \wedge$           |
| F | F | F | F          | W                          | F                                | $(A \vee B \vee C)$                       |

Mit einer guten Idee (Algorithmus 4.3, s. gelber Pfeil mit Kasten oben rechts) reichen insgesamt drei Literale, da eine Dualklausel auch eine KNF-Formel ist.

- b) Ausgangsformel  $\neg(A \rightarrow (B \vee C))$
- Elimination der Implikation  $\rightarrow \neg(\neg A \vee (B \vee C))$
- Negation näher zu den Aussagevariablen  $\rightarrow \neg\neg A \wedge \neg(B \vee C)$
- Negation näher zu den Aussagevariablen  $\rightarrow \neg\neg A \vee (\neg B \wedge \neg C)$
- Doppelnegation beseitigen  $\rightarrow A \wedge (\neg B \wedge \neg C)$
- Assoziativität  $\rightarrow A \wedge \neg B \wedge \neg C$

## 4.26 Disjunktive Normalform

Die großzügige Fragestellung erlaubt viele Antworten – hier nur drei Beispiele.

Aus 4.24: Welche der folgenden DNF-Formeln sind unerfüllbar?

- $(B \wedge C \wedge \neg C) \vee (A \wedge B \wedge A) \vee (\neg A \wedge C \wedge A)$
- $\{\{A, B, \neg A\}, \{\}\}_{DNF}$
- $\{\{A, B, \neg A\}, \{\neg C, C\}, \{\neg B, B, C\}\}_{DNF}$

Antwort: die ersten beiden. Dies folgt aus Satz 4.18.

Aus 4.25 (I): Bringen Sie  $A \rightarrow (B \vee C)$  in DNF-Form mittels

- a) Synthese aus Wahrheitstafel
- b) syntaktischem Formel-Umbau

Antwort (a): Aus der Wahrheitstafel zu 4.25 sind nach Streichung der letzten Spalte analog ablesbar

- die lange Lösung aus sieben dreiteiligen Dualklauseln  
 $(A \wedge B \wedge C) \vee \dots \vee (\neg A \wedge \neg B \wedge \neg C)$  mit allen Kombinationen außer  $A \wedge \neg B \wedge \neg C$ ,
- die kurze Lösung  $\neg A \vee B \vee C$ .

Antwort (b):  $A \rightarrow (B \vee C)$  (Elimination der Implikation)  $\rightarrow \neg A \vee B \vee C$

Aus 4.25 (II): Bringen Sie  $\neg(A \rightarrow (B \vee C))$  in DNF-Form mittels

- a) Synthese aus Wahrheitstafel
- b) syntaktischem Formel-Umbau

Antwort (a): Aus der Wahrheitstafel zu 4.25 ist  $A \wedge \neg B \wedge \neg C$  ablesbar.

Antwort (b):  $\neg(A \rightarrow (B \vee C))$  (Elimination der Implikation)  $\rightarrow \neg(\neg A \vee B \vee C)$

(Anti-Distributivität/ De Morgan)  $\rightarrow \neg\neg A \wedge \neg B \wedge \neg C \rightarrow A \wedge \neg B \wedge \neg C$

## 4.27 Resolution

- a) Die Wahrheitstafel liefert 16 F-Belegungen für  $A, B$  und  $C$ :  $ABC \mapsto WWW, \dots, FFF$ ; alle passenden Belegungen sind Gegenbeispiele.

Das führt nach dem Wahrheitstafel-Rezept zu einer KNF mit 16 Klauseln:

$$(\neg A \vee \neg B \vee \neg C) \wedge \dots \wedge (A \vee B \vee C).$$

Alternativ formen wir hier nach den „syntaktischen Regeln“ um, gehen dabei jedoch mehrfach die folgenden drei Schritte auf einmal (Schlagwort: Wann ist eine Implikation falsch?):

$$\neg(\varphi \rightarrow \psi) \rightarrow \neg(\neg\varphi \vee \psi) \rightarrow \neg\neg\varphi \wedge \neg\psi \rightarrow \varphi \wedge \neg\psi$$

$$\neg((A \rightarrow B) \rightarrow ((C \rightarrow A) \rightarrow (C \rightarrow B))) \quad \text{Wann ist eine Implikation falsch?} \rightarrow$$

$$(A \rightarrow B) \wedge \neg((C \rightarrow A) \rightarrow (C \rightarrow B)) \quad \text{dito} \rightarrow$$

$$(A \rightarrow B) \wedge ((C \rightarrow A) \wedge \neg(C \rightarrow B)) \quad \text{dito} \rightarrow$$

$$(A \rightarrow B) \wedge ((C \rightarrow A) \wedge (C \wedge \neg B)) \quad \text{Implikationen eliminieren} \rightarrow$$

$$(\neg A \vee B) \wedge ((\neg C \vee A) \wedge (C \wedge \neg B)) \quad \text{entbehrliche Klammern weg} \rightarrow$$

$$(\neg A \vee B) \wedge (\neg C \vee A) \wedge C \wedge \neg B \quad \text{ist KNF, bzw. als Menge geschrieben} \rightarrow$$

$$\{\{\neg A, B\}, \{\neg C, A\}, \{C\}, \{\neg B\}\}_{KNF}$$

- b)  $(A \rightarrow B) \rightarrow ((C \rightarrow A) \rightarrow (C \rightarrow B))$  ist genau dann allgemeingültig, wenn die Negation unerfüllbar ist.  $\neg((A \rightarrow B) \rightarrow ((C \rightarrow A) \rightarrow (C \rightarrow B)))$  ist genau dann unerfüllbar, wenn aus einer äquivalenten KNF-Formel, hier nach (a):

$$\{\{\neg A, B\}, \{\neg C, A\}, \{C\}, \{\neg B\}\}_{KNF},$$

per Resolution die leere Klausel erzeugbar ist. Dies ist der Fall:

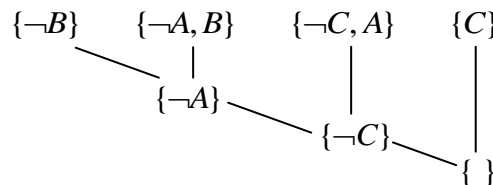

Also ist  $\{\{\neg A, B\}, \{\neg C, A\}, \{C\}, \{\neg B\}\}_{KNF}$  unerfüllbar und  $(A \rightarrow B) \rightarrow ((C \rightarrow A) \rightarrow (C \rightarrow B))$  eine Tautologie.

- c) Dualresolution für  $\{\{\neg A, B\}, \{\neg C, A\}, \{C\}, \{\neg B\}\}_{DNF}$  ergibt mit genau dem gleichen obigen Bild wie die Resolution in (b), dass die DNF-Formel allgemeingültig ist.

[ Der Graph sei zum Verständnis von unten nach oben interpretiert:

- Aus „nichts“ folgt (d.h. allgemeingültig ist)  $C \vee \neg C$ .
- Aus  $\neg C$  folgt: Entweder  $A$  gilt nicht, oder  $A$  gilt zusätzlich zu  $\neg C$ , also  $\neg A \vee (\neg C \wedge A)$ .
- Aus  $\neg A$  folgt: Entweder  $B$  gilt nicht, oder  $B$  gilt zusätzlich zu  $\neg A$ , also  $\neg B \vee (\neg A \wedge B)$ . ]

## 4.28 Resolution

Abkürzungen:

|     |   |                |
|-----|---|----------------|
| $D$ | – | Dora döst.     |
| $G$ | – | Gerd grübelt.  |
| $H$ | – | Hans hustet.   |
| $I$ | – | Ina isst.      |
| $K$ | – | Kevin kichert. |
| $L$ | – | Lena lächelt.  |

Umformung in KNF (Mengenschreibweise):

|                             |                                                      |                                            |
|-----------------------------|------------------------------------------------------|--------------------------------------------|
| $\neg H \vee G \vee L$      | $\rightarrow$                                        | $\{\neg H, G, L\}$                         |
| $\neg G \vee (I \wedge D)$  | $\rightarrow (\neg G \vee I) \wedge (\neg G \vee D)$ | $\rightarrow \{\neg G, I\}, \{\neg G, D\}$ |
| $\neg L \vee (D \wedge K)$  | $\rightarrow (\neg L \vee D) \wedge (\neg L \vee K)$ | $\rightarrow \{\neg L, D\}, \{\neg L, K\}$ |
| $D \vee \neg H$ , verneint: | $\rightarrow \neg D \wedge H$                        | $\rightarrow \{\neg D\}, \{H\}$            |

[Resolution zeigt die Unerfüllbarkeit der Menge dieser vier Aussagen bzw. sieben Klauseln.]

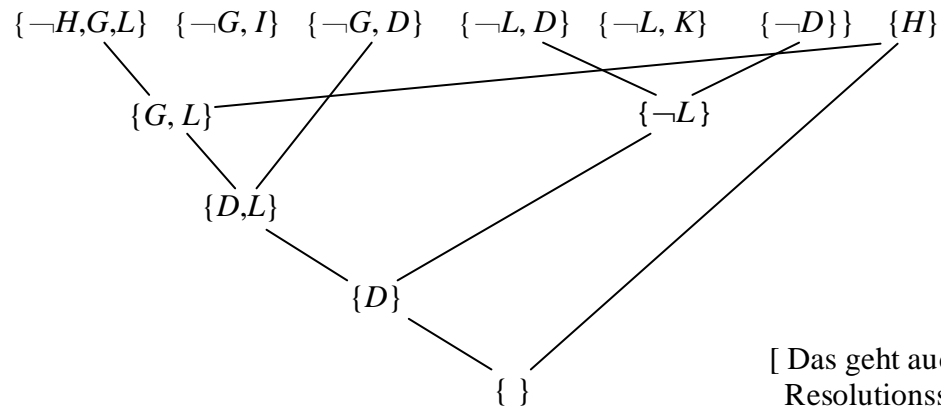



## 4.29 Tableaux, Dualtableaux

a) Tableaubaum:

(1): Knotennummer

[1]: Herkunftsknotennummer

✓: Knoten wurde, da Nichtliteral, aufgelöst.

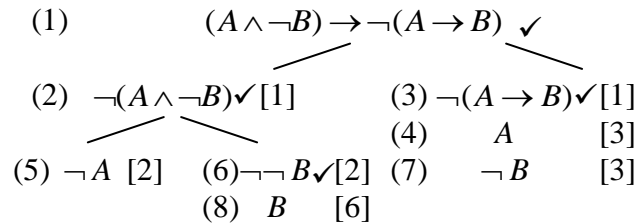

Erfüllbar ist  $(A \wedge \neg B) \rightarrow \neg(A \rightarrow B)$  wegen der Zweige ohne Literalwiderspruch.

[ Das sind hier sogar alle, also von (1) nach (5) bzw. (8) bzw. (7). ]

Eine zu  $(A \wedge \neg B) \rightarrow \neg(A \rightarrow B)$  äquivalente DNF-Formel ist  $\neg A \vee B \vee (A \wedge \neg B)$ .

[ Die drei Dualklauseln kommen von den Literalknoten in den Zweigen:  $\neg A$  vom Zweig nach (5),  $B$  von dem nach (8) und  $A \wedge \neg B$  von dem nach (7). ]

b) Dualtableaubaum:

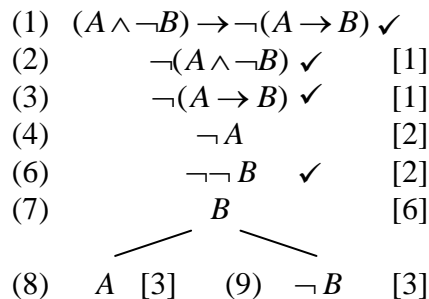

Aus den Zweigen des Dualtableaubaus lesen wir nach Rezept\* ab, dass  $(A \vee B \vee \neg A) \wedge (B \vee \neg B \vee \neg A)$  eine zu  $(A \wedge \neg B) \rightarrow \neg(A \rightarrow B)$  äquivalente KNF-Formel ist.

[\* Für jeden Zweig bildet die Disjunktion seiner Literale eine der Klauseln dieser KNF-Formel.]

Und  $(A \wedge \neg B) \rightarrow \neg(A \rightarrow B)$  ist allgemeingültig, da alle diese Zweige entgegengesetzte Literale enthalten.

[Jede Klausel der äquivalenten KNF-Formel ist hier nämlich eine Tautologie der Form  $P \vee \neg P$  (der Rest der Klausel), und die ganze Formel ist als Konjunktion von Tautologien selbst eine Tautologie.]

#### 4.30 AL-Werkzeugkasten

|    |                                                                    |         |
|----|--------------------------------------------------------------------|---------|
|    | Zeige $((A \vee B) \wedge (\neg A \vee C)) \rightarrow (B \vee C)$ |         |
| 1  | $(A \vee B) \wedge (\neg A \vee C)$                                | Ann     |
|    | Zeige $B \vee C$                                                   |         |
| 2  | $\neg(B \vee C)$                                                   | Ann     |
| 3  | $\neg B$                                                           | 2, NOB  |
| 4  | $\neg C$                                                           | 2, NOB  |
| 5  | $A \vee B$                                                         | 1, UB   |
| 6  | $A$                                                                | 3,5, OB |
| 7  | $\neg A \vee C$                                                    | 1, UB   |
| 8  | $\neg A$                                                           | 4,7, OB |
| 9  | $\perp$                                                            | 6,8, WE |
| 10 | $B \vee C$                                                         | IB      |
| 11 | $((A \vee B) \wedge (\neg A \vee C)) \rightarrow (B \vee C)$       | BB      |

#### 4.31 AL-Werkzeugkasten

|    |   |                   |         |    |   |                   |           |
|----|---|-------------------|---------|----|---|-------------------|-----------|
| a) | 1 | $A \vee B$        | Geg     | b) | 1 | $A \vee B$        | Geg       |
|    | 2 | $A \rightarrow C$ | Geg     |    | 2 | $A \rightarrow C$ | Geg       |
|    | 3 | $C \vee \neg B$   | Geg     |    | 3 | $C \vee \neg B$   | Geg       |
|    |   | Zeige $C$         |         |    |   | Zeige $C$         |           |
|    | 4 | $\neg C$          | Ann     |    | 4 | $B$               | Ann       |
|    | 5 | $\neg B$          | 3,4, OB |    | 5 | $\neg \neg B$     | 4, NNE    |
|    | 6 | $A$               | 1,5, OB |    | 6 | $C$               | 3,5, OB   |
|    | 7 | $C$               | 2,6 MP  |    | 7 | $B \rightarrow C$ | BB        |
|    | 8 | $\perp$           | 4,7 WE  |    | 8 | $C$               | 1,2,7, OB |
|    | 9 | $C$               | IB      |    | 9 | $C$               | DB        |

#### 4.32 OBDD und ROBDD

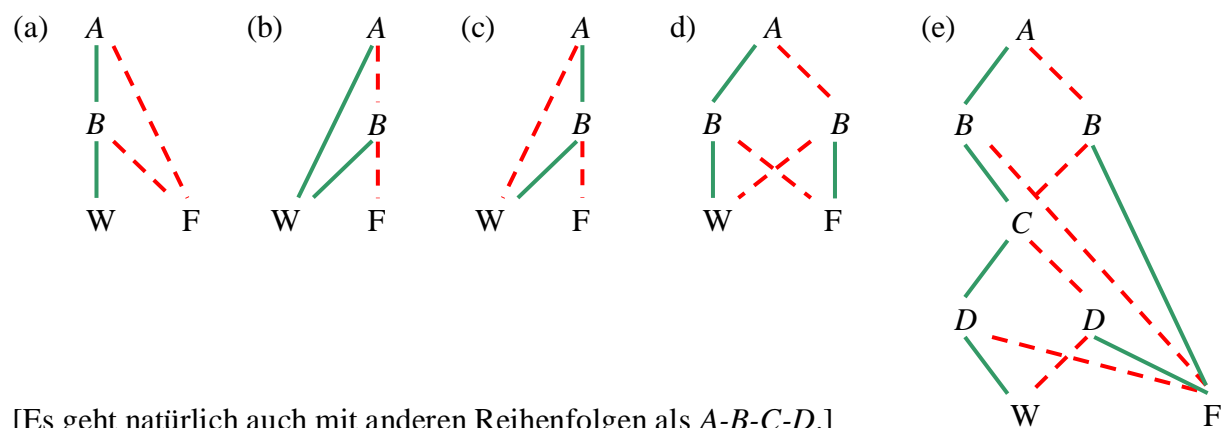

[Es geht natürlich auch mit anderen Reihenfolgen als A-B-C-D.]

### 4.33 PL1 und natürliche Sprache

- a)  $Gr(Mü) \wedge Sü(Mü, Fr)$   $U = \text{Städte in Deutschland}$   
 [ hier  $Sü$ : ... liegt südlich von ... ]
- b)  $\neg \exists x (Gr(x) \wedge Nö(x, Fl))$   $U = \text{Städte in Deutschland}$
- c)  $\neg \forall x (Gl(x) \rightarrow Go(x))$   $U = \text{Gegenstände oder Materialien}$
- d)  $\forall x ((Pe(x) \wedge \neg Ehr(x, pf)) \rightarrow \neg We(x, ta))$   $U = \text{Personen und Münzarten}$   
 [ hier  $Pe$ : ... ist Person,  $pf$  und  $ta$  sind Konstanten, nämlich bestimmte Münzarten. ]
- e)  $\forall x \exists y (Ke(x, y) \wedge Mag(y, x))$   $U = \text{Personen}$
- f)  $\neg \exists x (Sp(x) \wedge KoTemp(x) \wedge \exists y (Pe(y) \wedge Ess(y, x)))$   $U = \text{Speisen und Personen}$   
 [ hier  $KoTemp$ : ... ist auf Kochtemperatur,  $Sp$ : ... ist Speise ]

### 4.34 Freie und gebundene Variablenvorkommen

- a) 1 bindet 3, 5 und 7;      2 bindet 4 und 6.
- b) 1 bindet 2 und 4;      3 bindet 5.
- c) 1 bindet 3;      2 bindet 4.
- d) 1 bindet 2;      3 bindet 6;      4 bindet 5.

### 4.35 Auswertung unter einer Interpretation

|    | Term (in a) / Formel (in b,c,d)                                                                                                                                                                                                                  | Wert unter $I$                                                |
|----|--------------------------------------------------------------------------------------------------------------------------------------------------------------------------------------------------------------------------------------------------|---------------------------------------------------------------|
| a) | $c$                                                                                                                                                                                                                                              | 2                                                             |
|    | $f(c)$                                                                                                                                                                                                                                           | 3                                                             |
|    | $f(f(f(c)))$                                                                                                                                                                                                                                     | 6                                                             |
| b) | $P(f(c), f(c))$                                                                                                                                                                                                                                  | W [ 3 teilt 3.]                                               |
|    | $P(c, f(c))$                                                                                                                                                                                                                                     | F [ 2 teilt nicht 3.]                                         |
|    | $P(f(c), c) \rightarrow P(c, c)$                                                                                                                                                                                                                 | W [ z.B. weil $P(c, c)$ , 2 teilt 2.]                         |
| c) | $P(x, y)$                                                                                                                                                                                                                                        | W [ 2 teilt 2.]                                               |
|    | $\exists y P(x, y)$                                                                                                                                                                                                                              | W [ ... nämlich $y = 2$ oder 6.]                              |
|    | $\forall x P(x, y)$                                                                                                                                                                                                                              | F [ $x = 3$ teilt nicht 2.]                                   |
|    | $\forall x \exists y P(x, y)$                                                                                                                                                                                                                    | W [ z.B. $y = x$ .]                                           |
|    | $\exists y \forall x P(x, y)$                                                                                                                                                                                                                    | W [ $y = 6$ ]                                                 |
|    | $\forall y ((\forall x P(x, y)) \rightarrow P(f(y), y))$                                                                                                                                                                                         | W [ Alle teilen einzig $y = 6$ ,<br>und 6 teilt $6 = f(6)$ .] |
|    | $\forall x P(x, f(x))$                                                                                                                                                                                                                           | F [ siehe $P(c, f(c))$ in (b).]                               |
|    | $\exists x \forall y P(x, y)$                                                                                                                                                                                                                    | W [ $x = 1$ ]                                                 |
| d) | Für 1 gibt es <i>keinen</i> konstanten Term in $(U, I_K, I_F, I_R)$ !<br>[ Das ist nicht ungewöhnlich: Für die Mehrzahl aller reellen Zahlen gibt es keine hinschreibbaren Namen, denn von letzteren gibt es nur abzählbar viele, vgl. Kap. 5. ] |                                                               |

#### 4.36 Semantische Begriffe in PL1

- a) Gegenbeispiel 1:  $U := \mathbb{N}$ ,  $xRy :\Leftrightarrow x < y$ .  
[Zu jeder nat. Zahl  $x$  gibt es eine echt größere Zahl  $y$ . Es gibt aber keine nat. Zahl  $y$ , die echt größer als alle anderen ist: z.B. ist nie  $y < y$ .]  
Gegenbeispiel 2:  $U := \{0,1\}$ ,  $xRy :\Leftrightarrow x \neq y$ .
- b,c) Diese Gegenbeispiele reichen auch für (b) und (c) aus, da alle drei dasselbe besagen.  
Man kann aber für (b) und (c) ebensogut (a) und Sätze zur PL1-Semantik verwenden:
- b) Die Folgerung  $\neg\exists y\forall xR(x,y) \models \neg\forall x\exists yR(x,y)$  ist falsch:  
Wäre  $\neg\exists y\forall xR(x,y) \models \neg\forall x\exists yR(x,y)$  richtig,  
dann wäre  $\neg\exists y\forall xR(x,y) \rightarrow \neg\forall x\exists yR(x,y)$  allgemeingültig,  
dann  $\forall x\exists yR(x,y) \rightarrow \exists y\forall xR(x,y)$  allgemeingültig (Kontraposition) – ist es aber nicht, siehe (a).
- c) Die Formelmenge  $\{\forall x\exists yR(x,y), \forall y\neg\forall xR(x,y)\}$  ist erfüllbar:  
Wäre sie unerfüllbar, dann wäre  $\forall x\exists yR(x,y) \rightarrow \neg\forall y\neg\forall xR(x,y)$  allgemeingültig. Es ist aber  $\neg\forall y\neg\forall xR(x,y) \equiv \exists y\forall xR(x,y)$ , und wir erhielten dann über  $\neg\exists y\forall xR(x,y) \rightarrow \neg\forall x\exists yR(x,y)$  und Kontraposition, dass  $\forall x\exists yR(x,y) \rightarrow \exists y\forall xR(x,y)$  allgemeingültig wäre – im Widerspruch zu (a).

#### 4.37 Fehlinterpretationen von PL1-Äquivalenzen und -Folgerungen

[ Um mit Gegenbeispielen zu zeigen, dass „etwas“ in PL1 nicht generell gilt, brauchen wir ein Universum und eine Interpretation (i.a. der freien Variablen, der Konstanten und der Prädikate), unter der das Betreffende nicht gilt. ]

- a) Da  $P \leftrightarrow Q \equiv \{P \rightarrow Q, Q \rightarrow P\}$ , ist (a) bereits durch Aufgabe 4.36.a erledigt, denn dort gilt die Implikation nur in Gegenrichtung.
- b) Seien z.B.  $\varphi = R(x,b)$ ,  $\psi = R(a,b)$  mit Variablenname  $x$ , Konstantennamen  $a, b$  und Relationssymbol  $R$ . Mit der Interpretation in  $U = \{0,1\}$  von  $a$  und  $b$  durch 0 bzw. 1 und von  $xRy$  durch  $x = y$
- gilt  $\forall x\varphi \rightarrow \psi$ , denn unter dieser Interpretation ist die Prämisse  $\forall x\varphi$  falsch, denn nicht alle Elemente von  $U$  sind 1;
  - wird  $\forall x(\varphi \rightarrow \psi)$  aber falsch, da für  $x=1$   $\varphi$  wahr ist ( $x=b=1$ ),  $\psi$  (d.h.  $0=1$ ) aber nicht.
- c) Seien z.B.  $\varphi = G(x)$ ,  $\psi = U(x)$  mit Variablenname  $x$  und Relationssymbolen  $G$  und  $U$ . Mit der Interpretation in  $U := \mathbb{N}$  von  $G(x)$  und  $U(x)$  durch „ $x$  ist gerade“ bzw. „ $x$  ist ungerade“
- gilt  $\forall x(\varphi \vee \psi)$ , denn jede natürliche Zahl ist gerade oder ungerade;
  - wird  $\forall x\varphi \vee \forall x\psi$  aber falsch, denn weder sind alle natürlichen Zahlen gerade noch alle ungerade.

#### 4.38 Substituierbarkeit von Termen für Variablen in Formeln

|    | $\tau$    | $\varphi$                                  | Schritte im Algorithmus 4.10                                                                                                                                                                                           |
|----|-----------|--------------------------------------------|------------------------------------------------------------------------------------------------------------------------------------------------------------------------------------------------------------------------|
| a) | $y$       | $\forall y P(f(x))$                        | 1. $x$ frei in $\varphi$ ; 2. dort im Scope von $\forall y$ ;<br>3. $y$ kommt in $\tau$ vor $\rightarrow$ <span style="border: 1px solid black; padding: 2px;"><i>nicht</i> free(<math>\tau, x, \varphi</math>)</span> |
| b) | $f(x, y)$ | $R(x, y) \rightarrow \forall y P(y)$       | 1. $x$ frei in $\varphi$ ; 2. dort <i>nicht</i> im Scope von $\forall y$<br>$\rightarrow$ <span style="border: 1px solid black; padding: 2px;">free(<math>\tau, x, \varphi</math>)</span>                              |
| c) | $f(x, y)$ | $\forall y R(y, c) \vee \exists y R(x, y)$ | 1. $x$ frei in $\varphi$ ; 2. dort im Scope von $\forall y$ ;<br>3. $y$ kommt in $\tau$ vor $\rightarrow$ <span style="border: 1px solid black; padding: 2px;"><i>nicht</i> free(<math>\tau, x, \varphi</math>)</span> |
| d) | $f(x, y)$ | $\forall x R(x, y)$                        | 1. $x$ nicht frei in $\varphi$ $\rightarrow$ <span style="border: 1px solid black; padding: 2px;">free(<math>\tau, x, \varphi</math>)</span>                                                                           |
| e) | $f(y)$    | $\forall z R(x, y, z)$                     | 1. $x$ frei in $\varphi$ ; 2. dort im Scope von $\forall z$ ;<br>3. $y$ kommt nicht in $\tau$ vor $\rightarrow$ <span style="border: 1px solid black; padding: 2px;">free(<math>\tau, x, \varphi</math>)</span>        |

#### 4.39 Unentscheidbarkeit

Wenn man nach der Lektüre der Aufgabe nicht restlos verwirrt ist (was beim ersten Kontakt mit solchen Konstruktionen durchaus vorkommen kann), merkt man, dass man mit den Tipps bereits so gut wie am Ziel ist:

- Annahme: Ein Algorithmus *EinsEins* kann an einem Programmtext entscheiden, ob das Programm bei einem Input „1“ das Ergebnis 1 ausgibt.
- Dann kann man mit *EinsEins* als Unterprogramm das Programm *PgmStop* aus dem zweiten Tipp mit der angegebenen Leistung zum Laufen bringen. Was tut aber Programm *PgmStop*? Es liest  $P$  und  $w$ . Daraufhin gilt:
  - Stoppt  $P(w)$  (d.h. die Berechnung von  $P$  mit Eingabe  $w$ ), so ist  $PgmPw(1) = 1$ , was *PgmStop* erkennt und woraufhin es JA ausgibt.
  - Stoppt  $P(w)$  nicht, so ist  $PgmPw(1) = \text{undefiniert}$ , also nicht 1, was *PgmStop* erkennt und woraufhin es NEIN ausgibt.

Summa summarum: *PgmStop* liest ein Programm  $P$ , dann einen Input  $w$  und entscheidet dann, ob  $P$  auf  $w$  einen Output produziert! (#)

- Das (d.h. #) geht aber wegen der Unlösbarkeit des Halteproblems – wie im Beweis von Satz 4.29 erwähnt – nicht. Also muss die Annahme falsch sein.

[Man beachte, dass *EinsEins* zum Output NEIN nicht nur merken können muss, dass das untersuchte Programm mit Input 1 einen Output  $\neq 1$  ausgibt (Das wäre leicht festzustellen!), sondern ggf. auch, dass es gar keinen Output produziert (Und das ist i.a. unmöglich.). Die Aufgabe ist ein Spezialfall des sog. Satzes von Rice der Theoretischen Informatik.]

#### 4.40 Unentscheidbarkeit

- a) Vorgehen des Algorithmus:  
Formel einlesen, negieren und die negierte mit einem geeigneten Halbentscheidungs-Algorithmus als „Unterprogramm“ auf Allgemeingültigkeit untersuchen.
- b) Annahme: Es gibt einen Halbentscheidungs-Algorithmus *Wid* für Widerlegbarkeit.  
Dann nimmt man einen Halbentscheidungs-Algorithmus *All* für Allgemeingültigkeit und schreibt einen Algorithmus *Synth*, der *All* und *Wid* mit der eingelesenen Formel füttert und immer abwechselnd einen Schritt weiter rechnen lässt (Man programmiert also auch am Laufzeitsystem herum, bzw. simuliert eines).  
Nun ist jede eingelesene Formel entweder allgemeingültig oder widerlegbar. Stets muss also irgendwann einer von beiden, Algorithmus *All* oder Algorithmus *Wid*, fertig werden, im Falle der Allgemeingültigkeit *All*, im anderen Falle *Wid*. Dann soll der Synthese-Algorithmus *Synth* JA (wenn *All* gelang) bzw. NEIN (wenn *Wid* gelang) ausgeben und stoppen. Dieser Algorithmus *Synth* würde über die Allgemeingültigkeit entscheiden, was nach Satz 4.29 nicht möglich ist. Also muss die Annahme falsch sein.

#### 4.41 PL1-Werkzeugkasten

- |    |   |                                                  |              |
|----|---|--------------------------------------------------|--------------|
| a) | 1 | $\forall x(P(x) \rightarrow Q(x))$               | Geg          |
|    | 2 | $\forall x((P(x) \wedge Q(x)) \rightarrow R(x))$ | Geg          |
|    | 3 | $P(m)$                                           | Geg          |
|    |   | Zeige $R(m)$                                     |              |
|    | 4 | $P(m) \rightarrow Q(m)$                          | Sp, 1, [x/m] |
|    | 5 | $Q(m)$                                           | MP, 4,3      |
|    | 6 | $P(m) \wedge Q(m)$                               | UE, 3,5      |
|    | 7 | $(P(m) \wedge Q(m)) \rightarrow R(m)$            | Sp, 2, [x/m] |
|    | 8 | $R(m)$                                           | MP, 7,6      |
|    | 9 | $R(m)$                                           | DB           |
- 
- |    |   |                                                                                                |              |
|----|---|------------------------------------------------------------------------------------------------|--------------|
| b) |   | Zeige $\forall x[P(x) \rightarrow Q(x)] \rightarrow [\forall xP(x) \rightarrow \forall xQ(x)]$ |              |
|    | 1 | $\forall x[P(x) \rightarrow Q(x)]$                                                             | Ann          |
|    |   | Zeige $\forall xP(x) \rightarrow \forall xQ(x)$                                                |              |
|    | 2 | $\forall xP(x)$                                                                                | Ann          |
|    |   | Zeige $\forall xQ(x)$                                                                          | Ann          |
|    |   | Zeige $Q(a)$                                                                                   | Ann          |
|    | 3 | $P(a) \rightarrow Q(a)$                                                                        | Sp, 1, [x/a] |
|    | 4 | $P(a)$                                                                                         | Sp, 2, [x/a] |
|    | 5 | $Q(a)$                                                                                         | MP, 3,4      |
|    | 6 | $Q(a)$                                                                                         | DB           |
|    | 7 | $\forall xQ(x)$                                                                                | AB           |
|    | 8 | $\forall xP(x) \rightarrow \forall xQ(x)$                                                      | BB           |
|    | 9 | $\forall x[P(x) \rightarrow Q(x)] \rightarrow [\forall xP(x) \rightarrow \forall xQ(x)]$       | BB           |

#### 4.42 PL1-Werkzeugkasten, Resolution

- a)
- $K(x, y)$ :  $x$  ist Kind von  $y$ .
- $F(x)$ :  $x$  kann fliegen.
- $Gl(x)$ :  $x$  ist glücklich.
- $Gr(x)$ :  $x$  ist grün.
- $R(x)$ :  $x$  ist rosa.
- (i)  $\forall x(\forall y(K(y, x) \rightarrow F(y))) \rightarrow Gl(x)$
- (ii)  $\forall x(Gr(x) \rightarrow F(x))$
- (iii)  $\forall x([\exists y(K(x, y) \wedge Gr(y)) \rightarrow Gr(x)] \wedge [\neg \exists y(K(x, y) \wedge Gr(y)) \rightarrow R(x)])$
- (iv)  $\forall x(Gr(x) \rightarrow Gl(x))$
- b)
- |    |                                                                                                                                 |           |
|----|---------------------------------------------------------------------------------------------------------------------------------|-----------|
| 1  | $\forall x(\forall y(K(y, x) \rightarrow F(y))) \rightarrow Gl(x)$                                                              | Geg       |
| 2  | $\forall x(Gr(x) \rightarrow F(x))$                                                                                             | Geg       |
| 3  | $\forall x([\exists y(K(x, y) \wedge Gr(y)) \rightarrow Gr(x)] \wedge [\neg \exists y(K(x, y) \wedge Gr(y)) \rightarrow R(x)])$ | Geg       |
|    | Zeige $\forall x(Gr(x) \rightarrow Gl(x))$                                                                                      |           |
|    | Zeige $Gr(a) \rightarrow Gl(a)$                                                                                                 |           |
| 4  | $Gr(a)$                                                                                                                         | Ann       |
| 5  | $\forall y(K(y, a) \rightarrow F(y)) \rightarrow Gl(a)$                                                                         | Sp, 1     |
|    | Zeige $\forall y(K(y, a) \rightarrow F(y))$                                                                                     |           |
|    | Zeige $K(b, a) \rightarrow F(b)$                                                                                                |           |
| 6  | $K(b, a)$                                                                                                                       | Ann       |
| 7  | $[\exists y(K(b, y) \wedge Gr(y)) \rightarrow Gr(b)] \wedge [\neg \exists y(K(b, y) \wedge Gr(y)) \rightarrow R(b)]$            | Sp, 3     |
| 8  | $\exists y(K(b, y) \wedge Gr(y)) \rightarrow Gr(b)$                                                                             | UB, 7     |
| 9  | $K(b, a) \wedge Gr(a)$                                                                                                          | UE, 4,6   |
| 10 | $\exists y(K(b, y) \wedge Gr(y))$                                                                                               | EE, 9     |
| 11 | $Gr(b)$                                                                                                                         | MP, 8,10  |
| 12 | $Gr(b) \rightarrow F(b)$                                                                                                        | Sp, 2     |
| 13 | $F(b)$                                                                                                                          | MP, 12,11 |
| 14 | $K(b, a) \rightarrow F(b)$                                                                                                      | BB        |
| 15 | $\forall y(K(y, a) \rightarrow F(y))$                                                                                           | AB        |
| 16 | $Gl(a)$                                                                                                                         | MP, 5,15  |
| 17 | $Gr(a) \rightarrow Gl(a)$                                                                                                       | BB        |
| 18 | $\forall x(Gr(x) \rightarrow Gl(x))$                                                                                            | AB        |

c) Resolution für

$$\forall x(\forall y(K(y, x) \rightarrow F(y))) \rightarrow Gl(x) \wedge \forall x(Gr(x) \rightarrow F(x)) \wedge \\ \forall x([\exists y(K(x, y) \wedge Gr(y)) \rightarrow Gr(x)] \wedge \neg \forall x(Gr(x) \rightarrow Gl(x)) :$$

Bereinigung  $\rightarrow$

$$\forall x(\forall y(K(y, x) \rightarrow F(y))) \rightarrow Gl(x) \wedge \forall z(Gr(z) \rightarrow F(z)) \wedge \\ \forall u([\exists v(K(v, u) \wedge Gr(u)) \rightarrow Gr(v)] \wedge \neg \forall w(Gr(w) \rightarrow Gl(w))$$

Beseitigung der Implikationen  $\rightarrow$

$$\forall x(\neg \forall y(\neg K(y, x) \vee F(y)) \vee Gl(x)) \wedge \forall z(\neg Gr(z) \vee F(z)) \wedge \\ \forall u(\neg \exists v(K(u, v) \wedge Gr(v)) \vee Gr(u)) \wedge \neg \forall w(\neg Gr(w) \vee Gl(w))$$

Negationen bis an die atomaren Aussagen nach innen bringen  $\rightarrow$

$$\forall x(\exists y(K(y, x) \wedge \neg F(y)) \vee Gl(x)) \wedge \forall z(\neg Gr(z) \vee F(z)) \wedge \\ \forall u(\forall v(\neg K(u, v) \vee \neg Gr(v)) \vee Gr(u)) \wedge \exists w(G(w) \wedge \neg Gl(w))$$

Quantoren nach vorne bringen (pränex machen)  $\rightarrow$

$$\forall x \exists y \forall z \forall u \forall v \exists w [ ((K(y, x) \wedge \neg F(y)) \vee Gl(x)) \wedge (\neg Gr(z) \vee F(z)) \wedge \\ ((\neg K(u, v) \vee \neg Gr(v)) \vee Gr(u)) \wedge (Gr(w) \wedge \neg Gl(w)) ]$$

Skolemisierung  $\rightarrow$

$$\forall x \forall z \forall u \forall v [ ((K(f(x), x) \wedge \neg F(f(x))) \vee Gl(x)) \wedge (\neg Gr(z) \vee F(z)) \wedge \\ ((\neg K(u, v) \vee \neg Gr(v)) \vee Gr(u)) \wedge (Gr(g(x, z, u, v)) \wedge \neg Gl(g(x, z, u, v))) ]$$

in KINF bringen, Allquantoren weglassen  $\rightarrow$

$$((K(f(x), x) \vee Gl(x)) \wedge (\neg F(f(x)) \vee Gl(x))) \wedge (\neg Gr(z) \vee F(z)) \wedge \\ ((\neg K(u, v) \vee \neg Gr(v)) \vee Gr(u)) \wedge (Gr(g(x, z, u, v)) \wedge \neg Gl(g(x, z, u, v)))$$

in KINF-Mengenform  $\rightarrow$

$$\{ \{ K(f(x), x), Gl(x) \}, \{ \neg F(f(x)), Gl(x) \}, \{ \neg Gr(z) \vee F(z) \}, \\ \{ \neg K(u, v), \neg Gr(v), Gr(u) \}, \{ Gr(g(x, z, u, v)) \}, \{ \neg Gl(g(x, z, u, v)) \} \}$$

Variablen wieder separiert und Klauseln in Listenform  $\rightarrow$

1.  $\{ K(f(r), r), Gl(r) \}$
2.  $\{ \neg F(f(s)), Gl(s) \}$
3.  $\{ \neg Gr(t) \vee F(t) \}$
4.  $\{ \neg K(p, q), \neg Gr(q), Gr(p) \}$
5.  $\{ Gr(g(x, z, u, v)) \}$
6.  $\{ \neg Gl(g(x, z, u, v)) \}$

Resolutionsschritte ergeben folgende neue Knoten:

- |                                                     |                                    |
|-----------------------------------------------------|------------------------------------|
| 7. $\{ \neg F(f(g(x, z, u, v))) \}$                 | aus 2, 6, $[s / g(x, z, u, v)]$    |
| 8. $\{ K(f(g(x, z, u, v)), g(x, z, u, v)) \}$       | aus 1, 6, $[r / g(x, z, u, v)]$    |
| 9. $\{ \neg Gr(f(g(x, z, u, v))) \}$                | aus 1, 6, $[t / f(g(x, z, u, v))]$ |
| 10. $\{ \neg K(f(g(x, z, u, v)), q), \neg Gr(q) \}$ | aus 4, 9, $[p / f(g(x, z, u, v))]$ |
| 11. $\{ \neg Gr(g(x, z, u, v)) \}$                  | aus 8, 10, $[q / g(x, z, u, v)]$   |
| 12. $\{ \}$                                         | aus 5, 11                          |

[ Wir haben per Resolution gezeigt, dass aus (i)  $\wedge$  (ii)  $\wedge$  (iii)  $\wedge$   $\neg$ (iv) die leere Klausel, also die „Widerspruchskonstante“  $\perp$  folgt, d.h. (i) $\wedge$ (ii) $\wedge$ (iii)  $\rightarrow$  (iv). ]

d) Wenn Du glücklich bleiben willst, solltest Du vorsichtshalber höchstens mit einem grünen Drachen Kinder bekommen. [... denn Drachen ohne Kinder sind glücklich, rosa Drachen mit Kindern aber nur dann mit Sicherheit, wenn das andere Elternteil grün ist, denn dann sind alle Kinder grün und können fliegen.]



#### 4.43 PL1-Tableaux

Schema eines Knotens:

(Knotennummer) *Formel bzw. X* [Herkunftsknoten bzw. Knoten mit Literalwiderspruch]

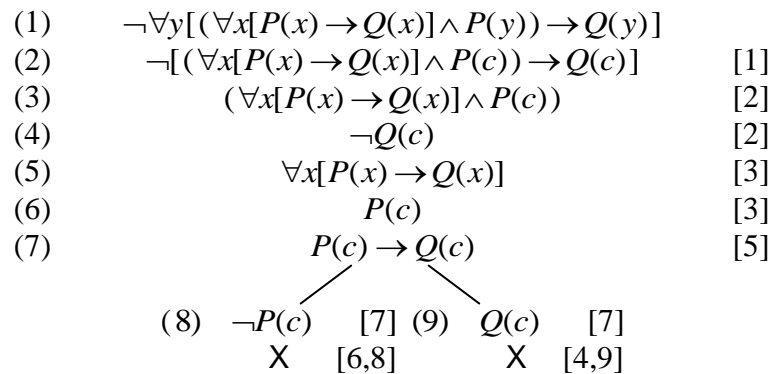

Alle Zweige sind geschlossen. Die Wurzelformel ist also unerfüllbar, und ihre Negation ist allgemeingültig.

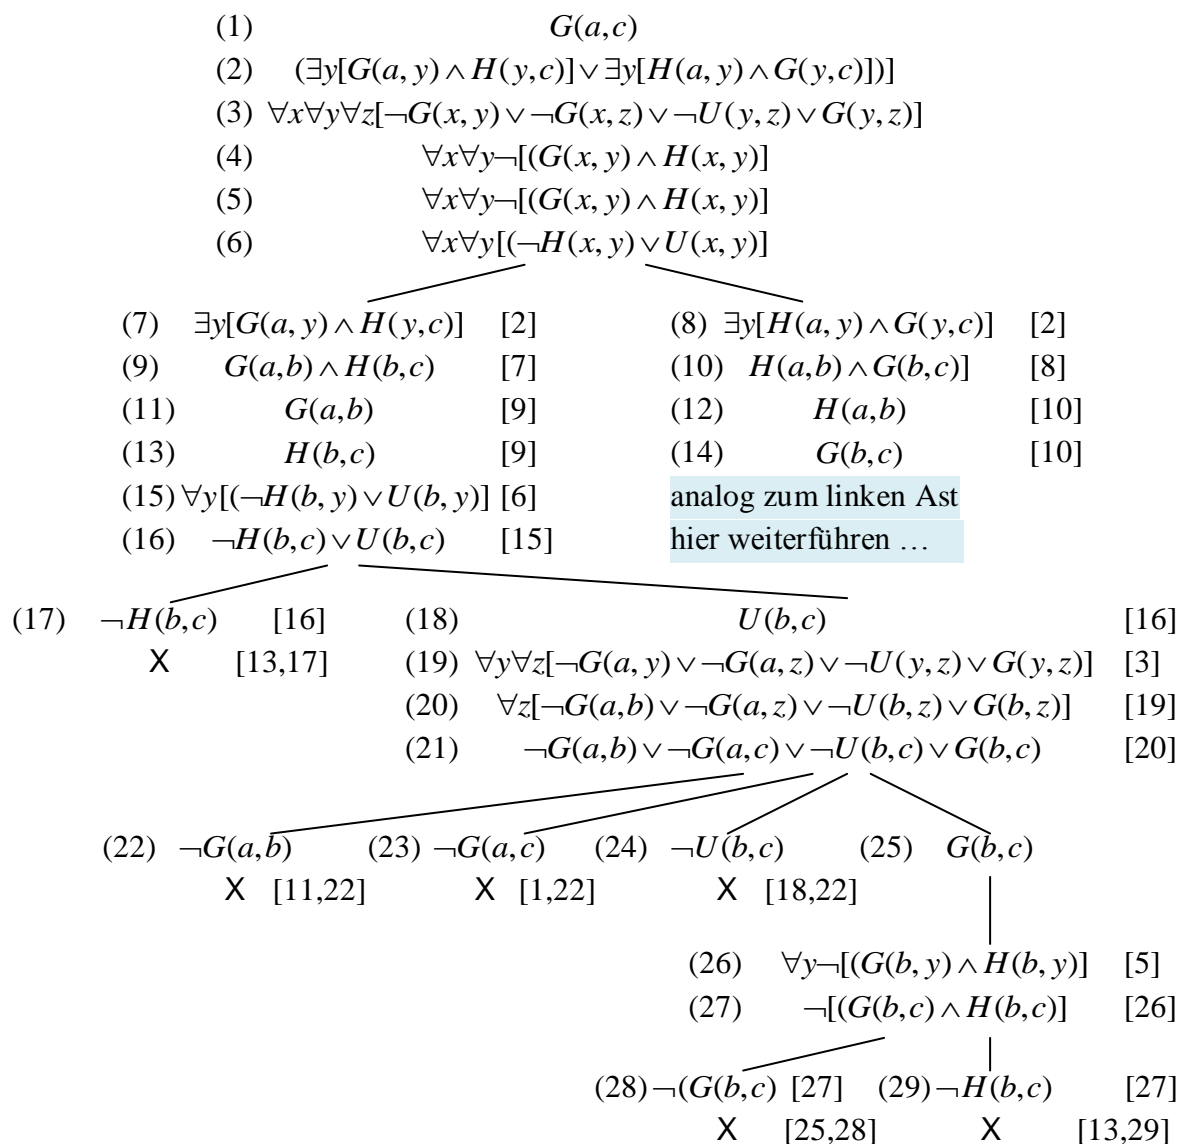

Und nun zur abschließenden Frage bezüglich Eheschließung:

Er lebt ja leider nicht mehr, daher stellt sich auch die Frage rechtlich nicht. Lediglich vor seiner letzten Ehe könnte er früher einmal seine spätere Schwägerin geheiratet haben. Diese Ehe hielt dann aber nicht.

#### 4.45 Pränexe Form

- a) [  $x$  kommt frei und gebunden vor.  $y$  kommt zweimal als Kopfvariable eines Quantors vor, daher ... ]  
 bereinigen  $\rightarrow \forall x \exists y P(x, y) \wedge \forall u R(v, u)$   
 Quantoren vorziehen  $\rightarrow \forall x \exists y \forall u (P(x, y) \wedge R(v, u))$
- b) [  $x$  kommt in zwei Quantisierungen als Kopfvariable vor, daher ... ]  
 $\leftrightarrow$  ersetzen  $\rightarrow \forall y \exists x [(R(x, y) \rightarrow \neg \exists x Q(y, x)) \wedge (\neg \exists x Q(y, x) \rightarrow R(x, y))]$   
 bereinigen  $\rightarrow \forall y \exists x [(R(x, y) \rightarrow \neg \exists z Q(y, z)) \wedge (\neg \exists v Q(y, v) \rightarrow R(x, y))]$   
 $\rightarrow$  ersetzen  $\rightarrow \forall y \exists x [(\neg R(x, y) \vee \neg \exists z Q(y, z)) \wedge (\exists v Q(y, v) \vee R(x, y))]$   
 Negation nach innen  $\rightarrow \forall y \exists x [(\neg R(x, y) \vee \forall z \neg Q(y, z)) \wedge (\exists v Q(y, v) \vee R(x, y))]$   
 Quantoren vorziehen  $\rightarrow \forall y \exists x \forall z \exists v [(\neg R(x, y) \vee \neg Q(y, z)) \wedge (Q(y, v) \vee R(x, y))]$

#### 4.46 Skolem-Form

- a)  $P(a)$   
 b)  $\forall x R(x, f(x))$   
 c)  $\forall x \forall z S(x, f(x), z, g(x, z))$   
 d) [ Achtung: 1.  $[u]$  Kopfvariable, 2.  $[u]$  frei; also zunächst bereinigen. Alternativ Quantorbeseitigung (Satz 4.23), auf  $\exists u$  angewendet, führt zum gleichen Endergebnis. ]  
 $\rightarrow \forall x \exists y \exists v [P(x, g(y, f(x))) \vee \neg Q(z) \vee \neg R(u, y)]$  (Bereinigung)  
 $\rightarrow \forall x \exists v [P(x, g(h(x), f(x))) \vee \neg Q(z) \vee \neg R(u, h(x))]$   
 $\rightarrow \forall x [P(x, g(h(x), f(x))) \vee \neg Q(z) \vee \neg R(u, h(x))]$

#### 4.47 Klausel-Normalform

- a) abschließen  $\rightarrow \exists x [P(x) \rightarrow (\forall y \exists z [S(x, z) \vee R(x, y, z)])]$   
 $\rightarrow$  ersetzen  $\rightarrow \exists x [\neg P(x) \vee (\forall y \exists z [S(x, z) \vee R(x, y, z)])]$   
 [ ist bereits bereinigt, Negationen sind bereits innen ]  
 Quantoren vorziehen  $\rightarrow \exists x \forall y \exists z [\neg P(x) \vee S(x, z) \vee R(x, y, z)]$   
 skolemisieren  $\rightarrow \forall y [\neg P(a) \vee S(a, f(y)) \vee R(a, y, f(y))]$   
 Klausel-NF  $\rightarrow \{ \{ \neg P(a), S(a, f(y)), R(a, y, f(y)) \} \}_{KINF}$
- b) abschließen  $\rightarrow \exists y \exists x [R(x, y) \leftrightarrow \neg \exists x Q(y, x)]$   
 $\leftrightarrow$  ersetzen  $\rightarrow \exists y \exists x [(R(x, y) \rightarrow \neg \exists x Q(y, x)) \wedge (\neg \exists x Q(y, x) \rightarrow R(x, y))]$   
 2-mal  $\rightarrow$  ersetzen, Doppelneg. beseitigen  
 $\rightarrow \exists y \exists x [(\neg R(x, y) \vee \neg \exists x Q(y, x)) \wedge (\exists x Q(y, x) \vee R(x, y))]$   
 bereinigen  $\rightarrow \exists y \exists x [(\neg R(x, y) \vee \neg \exists z Q(y, z)) \wedge (\exists u Q(y, u) \vee R(x, y))]$   
 Negation nach innen  $\rightarrow \exists y \exists x [(\neg R(x, y) \vee \forall z \neg Q(y, z)) \wedge (\exists u Q(y, u) \vee R(x, y))]$   
 Quantoren vorziehen  $\rightarrow \exists y \exists x \forall z \exists u [(\neg R(x, y) \vee \neg Q(y, z)) \wedge (Q(y, u) \vee R(x, y))]$   
 skolemisieren  $\rightarrow \forall z [(\neg R(b, a) \vee \neg Q(a, z)) \wedge (Q(a, f(z)) \vee R(b, a))]$   
 Klausel-NF  $\rightarrow \{ \{ \neg R(b, a), \neg Q(a, z) \}, \{ Q(a, f(z)) \vee R(b, a) \} \}_{KINF}$

#### 4.48 Unifikation

- a)  $x/a, y/b$
- b)  $-$
- c)  $-$
- d)  $-$
- e)  $x/y$  oder  $y/x$
- f)  $x/a, y/a$
- g)  $x/h(z)$
- h)  $x/h(a), z/a$

[ Anwendungsbeispiel für Unifikationsalgorithmus 4.12: Unteraufgabe (h)

Schritt 1:  $A := M := \{Q(g(x, y), f(x)), Q(g(h(a), y), f(h(z)))\}, s := [ ]$   
 Schritt 2:  $-$   
 Schritt 3:  $L_1 := Q(g(x, y), f(x)), L_2 := Q(g(h(a), y), f(h(z))), \leftarrow \text{erster Unterschied}$   
 Schritt 4:  $-$   
 Schritt 5:  $t := h(a); s := [x/h(a)]; A := \{Q(g(h(a), y), f(h(a))), Q(g(h(a), y), f(h(z)))\}$   
 Schritt 2:  $-$   
 Schritt 3:  $L_1 := Q(g(h(a), y), f(h(a))), L_2 := Q(g(h(a), y), f(h(z))), \leftarrow 1. \text{ U.}$   
 Schritt 4:  $-$   
 Schritt 5:  $-$   
 Schritt 6:  $L_1 := Q(g(h(a), y), f(h(a))), L_2 := Q(g(h(a), y), f(h(a)))$   
 Schritt 5:  $t := a; s := [x/h(a)] \circ [z/a]; A := \{Q(g(h(a), y), f(h(a)))\}$   
 Schritt 2: Ausgabe: „M ist unifizierbar durch  $[x/h(a)] \circ [z/a]$ “ ]

#### 4.49 Resolution

Formalisierung der Aussage:

$$\begin{aligned}
 & \forall x (\neg R(x, x) \leftrightarrow R(b, x)) \\
 & \equiv \forall x [(\neg R(x, x) \rightarrow R(b, x)) \wedge (R(b, x) \rightarrow \neg R(x, x))] \\
 & \equiv \forall x [(R(x, x) \vee R(b, x)) \wedge (\neg R(x, x) \vee \neg R(b, x))] \text{ bzw.} \\
 & \{ \{ R(x, x), R(b, x) \}, \{ \neg R(x, x), \neg R(b, x) \} \}_{KINF}
 \end{aligned}$$

[ Idee: Nicht  $R(x, x)$  mit  $\neg R(x, x)$  oder  $R(b, x)$  mit  $\neg R(b, x)$  verrechnen, sondern z.B.  $\neg R(x, x)$  mit  $R(b, x)$  verrechnen und dazu  $x/b$  unifizieren!

Aus der KINF wird  $\{ \{ R(b, b) \}, \{ \neg R(b, b) \} \}$ , und dies ermöglicht Resolution zu  $\emptyset$ . ]

$$\begin{array}{ccc}
 \{ R(x, x), R(b, x) \} & & \{ \neg R(x, x), \neg R(b, x) \} \\
 & \swarrow \quad \searrow & \\
 & [x/b] & \\
 & \searrow \quad \swarrow & \\
 & \emptyset &
 \end{array}$$

#### 4.50 PL1=-Werkzeugkasten

- a) Man beweist z.B., dass die Formeln zyklisch Folgerungen voneinander sind, hier exemplarisch die zweite eine Folgerung aus der ersten und die erste eine Folgerung aus der letzten:

|    |                                                                                         |             |
|----|-----------------------------------------------------------------------------------------|-------------|
| 1  | $\exists xP(x) \wedge \forall x\forall y((P(x) \wedge P(y)) \rightarrow x = y)$         | Geg         |
|    | Zeige $\exists xP(x) \wedge \neg\exists x\exists y((P(x) \wedge P(y)) \wedge x \neq y)$ |             |
| 2  | $\exists xP(x)$                                                                         | UB, 1       |
|    | Zeige $\neg\exists x\exists y((P(x) \wedge P(y)) \wedge x \neq y)$                      |             |
| 3  | $\exists x\exists y((P(x) \wedge P(y)) \wedge x \neq y)$                                | Ann         |
| 4  | $\exists y((P(a) \wedge P(y)) \wedge a \neq y)$                                         | EB, 3       |
| 5  | $(P(a) \wedge P(b)) \wedge a \neq b$                                                    | EB, 4       |
| 6  | $P(a) \wedge P(b)$                                                                      | UB, 5       |
| 7  | $a \neq b$                                                                              | UB, 5       |
| 8  | $\forall x\forall y((P(x) \wedge P(y)) \rightarrow x = y)$                              | UB, 1       |
| 9  | $\forall y((P(a) \wedge P(y)) \rightarrow a = y)$                                       | Sp, 8 [x/a] |
| 10 | $(P(a) \wedge P(y)) \rightarrow a = b$                                                  | Sp, 9 [y/b] |
| 11 | $a = b$                                                                                 | MP, 6,10    |
| 12 | $\perp$                                                                                 | WE, 7,11    |
| 13 | $\neg\exists x\exists y((P(x) \wedge P(y)) \wedge x \neq y)$                            | IB          |
| 14 | $\exists xP(x) \wedge \neg\exists x\exists y((P(x) \wedge P(y)) \wedge x \neq y)$       | UE, 2,13    |
| 15 | $\exists xP(x) \wedge \neg\exists x\exists y((P(x) \wedge P(y)) \wedge x \neq y)$       | DB          |

|    |                                                                                       |             |
|----|---------------------------------------------------------------------------------------|-------------|
| 1  | $\exists x\forall y(P(y) \leftrightarrow x = y)$                                      | Geg         |
|    | Zeige $\exists xP(x) \wedge \forall x\forall y((P(x) \wedge P(y)) \rightarrow x = y)$ |             |
| 2  | $\forall y(P(y) \leftrightarrow a = y)$                                               | Sp, 1 [x/a] |
| 3  | $P(a) \leftrightarrow a = a$                                                          | Sp, 2 [y/a] |
| 4  | $a = a \rightarrow P(a)$                                                              | GB, 3       |
| 5  | $a = a$                                                                               | Rf=         |
| 6  | $P(a)$                                                                                | MP, 4,5     |
| 7  | $\exists xP(x)$                                                                       | EE, 6       |
|    | Zeige $\forall x\forall y((P(x) \wedge P(y)) \rightarrow x = y)$                      |             |
|    | Zeige $\forall y((P(b) \wedge P(y)) \rightarrow b = y)$                               |             |
|    | Zeige $(P(b) \wedge P(c)) \rightarrow b = c$                                          |             |
| 8  | $P(b) \wedge P(c)$                                                                    | Ann         |
| 9  | $P(b)$                                                                                | EB, 4       |
| 10 | $P(b) \leftrightarrow a = b$                                                          | Sp, 2 [y/b] |
| 11 | $P(b) \rightarrow a = b$                                                              | GB, 10      |
| 12 | $a = b$                                                                               | MP, 11,9    |
| 13 | $b = a$                                                                               | Sy=, 12     |
| 14 | $P(c)$                                                                                | EB, 4       |
| 15 | $P(c) \leftrightarrow a = c$                                                          | Sp, 2 [y/c] |
| 16 | $P(c) \rightarrow a = c$                                                              | GB, 10      |
| 17 | $a = c$                                                                               | MP, 9,11    |
| 18 | $b = c$                                                                               | Tr=, 13,17  |
| 19 | $(P(b) \wedge P(c)) \rightarrow b = c$                                                | BB          |
| 20 | $\forall y((P(b) \wedge P(y)) \rightarrow b = y)$                                     | AB          |
| 21 | $\forall x\forall y((P(x) \wedge P(y)) \rightarrow x = y)$                            | AB          |
| 22 | $\exists xP(x) \wedge \forall x\forall y((P(x) \wedge P(y)) \rightarrow x = y)$       | UE, 7, 21   |

|      |                                                                                                                              |              |
|------|------------------------------------------------------------------------------------------------------------------------------|--------------|
| b) 1 | $\exists x \forall y (R(x, y, y) \wedge R(y, x, y))$                                                                         | Geg          |
| 2    | $\forall w \forall x \forall y \forall z ((R(w, x, y) \wedge R(w, x, z)) \rightarrow y = z)$                                 | Geg          |
|      | Zeige $\forall x \forall y (\forall z (R(x, z, z) \wedge R(z, x, z) \wedge R(y, z, z) \wedge R(z, y, z)) \rightarrow x = y)$ |              |
|      | Zeige $\forall y (\forall z (R(a, z, z) \wedge R(z, a, z) \wedge R(y, z, z) \wedge R(z, y, z)) \rightarrow a = y)$           |              |
|      | Zeige $\forall z (R(a, z, z) \wedge R(z, a, z) \wedge R(b, z, z) \wedge R(z, b, z)) \rightarrow a = b$                       |              |
| 3    | $\forall z (R(a, z, z) \wedge R(z, a, z) \wedge R(b, z, z) \wedge R(z, b, z))$                                               | Ann          |
| 4    | $R(a, a, a) \wedge R(a, a, a) \wedge R(b, a, a) \wedge R(a, b, a)$                                                           | Sp, 3 [z/a]  |
| 5    | $R(a, b, b) \wedge R(b, a, b) \wedge R(b, b, b) \wedge R(b, b, b)$                                                           | Sp, 3 [z/b]  |
| 6    | $R(a, b, a)$                                                                                                                 | UB, 4        |
| 7    | $R(a, b, b)$                                                                                                                 | UB, 5        |
| 8    | $R(a, b, a) \wedge R(b, b, b)$                                                                                               | UE, 6,7      |
| 9    | $\forall x \forall y \forall z ((R(a, x, y) \wedge R(a, x, z)) \rightarrow y = z)$                                           | AB, 2 [w/a]  |
| 10   | $\forall y \forall z ((R(a, b, y) \wedge R(a, b, z)) \rightarrow y = z)$                                                     | AB, 9 [x/b]  |
| 11   | $\forall z ((R(a, b, a) \wedge R(a, b, z)) \rightarrow a = z)$                                                               | AB, 10 [y/a] |
| 12   | $(R(a, b, a) \wedge R(a, b, b)) \rightarrow a = b$                                                                           | AB, 11 [z/b] |
| 13   | $a = b$                                                                                                                      | MP, 8,12     |
| 14   | $\forall z (R(a, z, z) \wedge R(z, a, z) \wedge R(b, z, z) \wedge R(z, b, z)) \rightarrow a = b$                             | IB           |
| 15   | $\forall y (\forall z (R(a, z, z) \wedge R(z, a, z) \wedge R(y, z, z) \wedge R(z, y, z)) \rightarrow a = y)$                 | AB [y/b]     |
| 16   | $\forall x \forall y (\forall z (R(x, z, z) \wedge R(z, x, z) \wedge R(y, z, z) \wedge R(z, y, z)) \rightarrow x = y)$       | AB [x/a]     |

Zu “übrigens”:

Beispielsweise Allquantorketten wie in  $\forall w, x, y, z Q(w, x, y, z)$  mit gleichzeitiger Ersetzung mehrerer Quantorvariablen bei Sp und in der Gegenrichtung mehrerer Konstanten bei AB.
