# Supplementary material
Source: publisher site journal article supplement (https://www.degruyterbrill.com/publication/isbn/9783111336107/downloadAsset/9783111336107_L%C3%B6sungen.zip)
Supplement: Supplementary file 5 [file Lsungen_Kapitel 6.pdf › Lsungen_Kapitel 6.pdf]

# **Lösungen der Übungsaufgaben in Diskrete Mathematik kompakt (Bernd Baumgarten, De Gruyter, 2024) – Kapitel 6: Graphen –**

Bitte beachten Sie:

- Versuchen Sie stets, die Aufgabe zunächst selbst zu lösen! Das Anschauen einer gelösten Übungsaufgabe *ohne vorherigen eigenen ernsthaften Bearbeitungsversuch* nützt Ihnen hinsichtlich des Lernerfolgs oft nicht mehr als der Genuss einer Tasse Kaffee: Es erzeugt einfach nur vorübergehend ein angenehmes Gefühl, hinterlässt aber keinen bleibenden Effekt.
- Zu jeder Aufgabe kann es verschiedene korrekte Lösungen bzw. Lösungswege und für jede Lösung mehrere Schreibweisen geben. Daher sind die in der Folge vorgestellten Lösungen durchweg nur als Beispiele zu verstehen.
- Zusätzliche Erklärungen stehen in eckigen Klammern [ ... ].
- Auch in Übungsaufgaben können Fehler stecken. Bitte beachten Sie die eventuelle Korrigenda-Datei des Verlages.

## **6.1 Multigraphen und gewöhnliche Graphen**

a) Einen Multigraphen kann man als kantenbeschrifteten Graphen  $G = (V, E, f)$  auffassen.  $G = (V, E)$  ist dabei ein gewöhnlicher Graph (gleich ob gerichtet oder nicht), und die Beschriftungsfunktion  $f : E \rightarrow \mathbb{N}$  gibt an, wievielfach jede einzelne Kante existieren soll.

b) Für jede Kante  $e$  mit  $f(e) > 1$  werden  $f(e)$  neue Knoten zu  $V$  hinzu genommen, nennen wir sie  $v_{e,1}$  bis  $v_{e,f(e)}$ .

Gleichzeitig wird in  $E$  diese Kante  $e$  durch zwei Kanten pro neuem Knoten ersetzt, beispielsweise im gerichteten Fall eine Kante  $e = (u, w)$  mit  $f(e) > 1$  durch die  $2 \cdot f(e)$  Kanten  $(u, v_{e,1}), (v_{e,1}, w), \dots, (u, v_{e,f(e)}), (v_{e,f(e)}, w)$ .

Entsprechend wird in einem als Kantenfolge beschriebenen Weg die Begehung des  $k$ -ten Exemplars der Kante  $e = (u, w)$  durch die Begehung der Kantenfolge  $(u, v_{e,k}), (v_{e,k}, w)$  ersetzt.

## 6.2 Ungerichtete und symmetrische gerichtete Graphen

[ Man beachte, dass die einer ungerichteten Kantenmenge  $F$  zugeordnete gerichtete Kantenmenge  $F_g$  wegen  $(v, w) \in F_g \Rightarrow \{v, w\} \in F \Rightarrow \{w, v\} \in F \Rightarrow (v, w) \in F_g$  symmetrisch ist. Ferner entspricht der ungerichteten Kante  $\{v\}$  wegen  $\{v\} = \{v, v\}$  die Kante  $(v, v)$ . ]

- a) Zunächst sei  $G = (V, E)$  ein symmetrischer gerichteter Graph. Der zugehörige ungerichtete Graph  $G_u$  hat laut Text die gleiche Knotenmenge  $V$  und die Kantenmenge  $E_u = \{\{v, w\} \mid (v, w) \in E\}$ . Der zu  $G_u$  gehörende gerichtete Graph hat dann wieder die gleiche Knotenmenge  $V$  und die Kantenmenge  $E_{ug} = \{(v, w) \mid \{v, w\} \in E_u\}$ .

Wir zeigen  $E_{ug} = E$ :

- $(v, w) \in E \Rightarrow \{v, w\} \in E_u \Rightarrow (v, w) \in E_{ug}$   
gemäß der Definition der Zuordnungen
- $(v, w) \in E_{ug} \Rightarrow \{v, w\} \in E_u \Rightarrow [(v, w) \in E \vee (w, v) \in E] \Rightarrow (v, w) \in E$   
gemäß der Definition der Zuordnungen und im letzten Schritt wegen der Symmetrie von  $G$ .

Also ist  $G = (V, E) = (V, E_{ug}) = G_{ug}$ . [ Bei nicht symmetrischem  $G$  wäre das nicht so. ]

Dann sei  $U = (V, E)$  ein ungerichteter Graph. Der zugehörige gerichtete Graph  $U_g$  hat laut Text die gleiche Knotenmenge  $V$  und die Kantenmenge  $E_g = \{(v, w) \mid \{v, w\} \in E\}$ . Der zu  $U_g$  gehörende ungerichtete Graph hat dann wieder die gleiche Knotenmenge  $V$  und die Kantenmenge  $E_{gu} = \{\{v, w\} \mid (v, w) \in E_g\}$ .

Wir zeigen  $E_{gu} = E$ : Es gilt

- $\{v, w\} \in E \Rightarrow (v, w) \in E_u \Rightarrow \{v, w\} \in E_{ug}$   
gemäß der Definition der Zuordnungen, sowie
- $\{v, w\} \in E_{gu} \Rightarrow [(v, w) \in E_g \vee (w, v) \in E_g] \Rightarrow [\{v, w\} \in E \vee \{w, v\} \in E] \Rightarrow \{v, w\} \in E$   
gemäß der Definition der Zuordnungen und im letzten Schritt wegen  $\{w, v\} = \{v, w\}$ .

- b) Seien  $G_1 = (V, E)$  und  $G_2 = (W, F)$  symmetrische gerichtete Graphen und  $f$  ein Isomorphismus von  $G_1$  auf  $G_2$ , d.h. eine Bijektion von  $V$  auf  $W$  mit

$$(s, t) \in E \Leftrightarrow (f(s), f(t)) \in F.$$

Dann folgt (unter Verwendung von  $(s, t) \in E \Leftrightarrow (t, s) \in E$  und  $\{w, v\} = \{v, w\}$ )

$$\{s, t\} \in E_u \Leftrightarrow (s, t) \in E \Leftrightarrow (f(s), f(t)) \in F \Leftrightarrow \{f(s), f(t)\} \in F_u.$$

Seien  $G_1 = (V, E)$  und  $G_2 = (W, F)$  symmetrische gerichtete Graphen und  $f$  ein Isomorphismus von  $G_{1u}$  auf  $G_{2u}$ , d.h. eine Bijektion von  $V$  auf  $W$  mit

$$\{s, t\} \in E_u \Leftrightarrow \{f(s), f(t)\} \in F_u.$$

Dann folgt analog

$$(s, t) \in E \Leftrightarrow \{s, t\} \in E_u \Leftrightarrow \{f(s), f(t)\} \in F_u \Leftrightarrow (f(s), f(t)) \in F.$$

Also haben die symmetrischen gerichteten Graphen innerhalb der Abbildungen auf den Knotenmengen dieselben Isomorphismen wie die zugeordneten ungerichteten Graphen.

- c) ... folgt aus (a) und (b), da genau dann  $H$  der dem symmetrischen gerichteten Graphen  $G$  zugeordnete ungerichtete Graph ist, wenn der (symmetrische) Graph  $G$  der dem ungerichteten Graph  $H$  zugeordnete gerichtete Graph ist.

### 6.3 Planarität

- a) Verlegen Sie beispielsweise den rechten oberen Knoten in die Mitte, und den linken oberen Knoten nach links ganz unten:

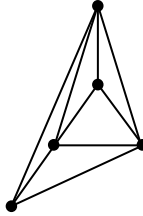

- b) Der Graph ist schlingenfrees **vollständig**, d.h. jeder Knoten ist mit jedem anderen verbunden. Nehmen wir an, er werde Kante um Kante kreuzungsfrei gezeichnet. Das muss natürlich in jeder Reihenfolge der Kanten gehen. Also kann man anfangs die fünf Knoten zyklisch mit fünf Kanten kreuzungsfrei verbinden. Der resultierende Hamiltonkreis zerlegt die Ebene in einen inneren und einen äußeren Bereich, wie in den beiden abgebildeten Beispielen. Dabei ist die genaue Form gleichgültig, und es genügt, die rechte zu betrachten. Man denke beispielsweise an eine Zeichnung auf einer Gummihaut oder auf einem Kuchenteig, d.h. mit beliebigen Verzerrungsmöglichkeiten.

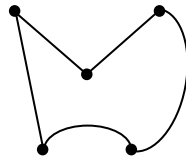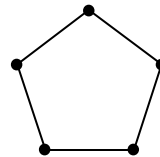

Nun fehlen noch 5 „Diagonalen“, d.h. Kanten zwischen einem Knoten und einem zyklisch übernächsten, die man jeweils nur ganz innen oder ganz außen zeichnen kann, damit man den Kreis nicht kreuzt. Nach zwei Innendiagonalen passt aber innen keine weitere Diagonale kreuzungsfrei hinein, siehe unten links. Ähnlich passt nach zwei Außendiagonalen außen keine weitere Diagonale kreuzungsfrei in die Zeichnung, siehe unten rechts. Die fünfte und letzte Diagonale kann dann nicht mehr kreuzungsfrei eingezeichnet werden.

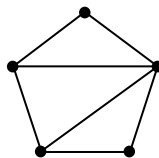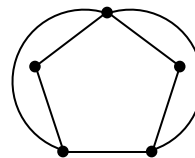

## 6.4 Planarität, Isomorphie

Wir suchen einen Teilgraphen, der aus einem der beiden Kriterium-Graphen des Planaritätskriterien-Satzes von Kuratowski durch Einfügung von Knoten in Kanten entsteht, denn dann ist der Graph als nicht planar erwiesen.

Wie finden wir diesen Teilgraphen? – Durch Streichung der beiden waagrechten Kanten (gestrichelt)! Eingefügt sollen nämlich die graue unterlegten Knoten sein, die wir uns jetzt umgekehrt wie im Bild „umschiffen“ denken. Und in der Tat zeigen dann die nummerierten Knoten, dass wir den verbleibenden Graphen als Kriterium-Graphen – er wird als  $K_{3,3}$  bezeichnet – in Satz 6.1 wiederfinden. [ Gewissermaßen kann man die Knoten 1 und 3 hoch ziehen, die Kanten begradigen und das Ganze zurecht zupfen, um ein ordentliches Bild von  $K_{3,3}$  zu erzeugen. ]

Aus  $K_{3,3}$  entsteht also durch Einfügen der graue unterlegten Knoten ein Teilgraph des Petersen-Graphs, so dass letzterer nach Satz 6.1 nicht planar ist.

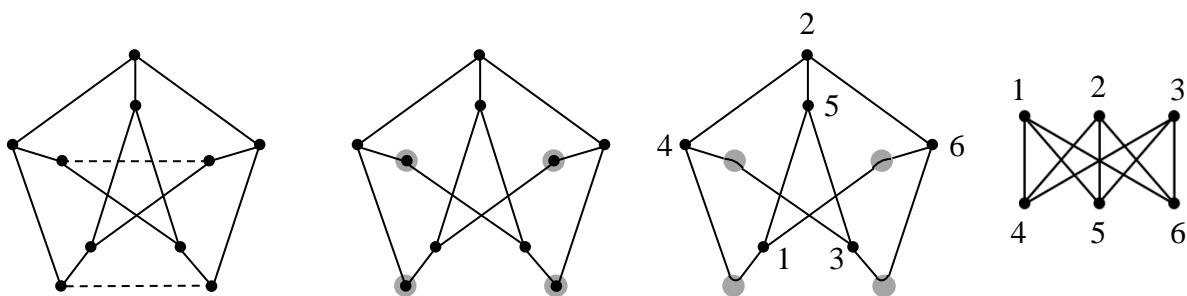

## 6.5 Knoteneinfügung und Kantenkontraktion

Die **Einfügung von Knoten** in einen schlingenfreien ungerichteten Graphen  $G = (V, E)$  besteht aus 0, einem oder mehreren hintereinander ausgeführten Schritten („Einfügung eines Knotens“) folgender Art: Für eine Kante  $\{u, w\} \in E$  und einen neuen Knoten  $v$ , also mit  $v \notin V$ , wird  $G$  ersetzt durch  $G' = (V', E')$  mit

- $V' := V \cup \{v\}$ ,
- $E' := (E \cup \{\{u, v\}, \{v, w\}\}) \setminus \{\{u, w\}\}$ .

Eine **Kantenkontraktion** in einem ungerichteten Graphen  $G = (V, E)$  ist ein Schritt folgender Art: Für eine Kante  $\{u, v\} \in E$  wird  $G$  ersetzt durch  $G' = (V', E')$  mit

- $V' := V \setminus \{v\}$ ,
- $E' := (E \setminus E_v) \cup \{\{u, w\} \mid w \in N_{v,u}, w \neq u\}$ ,

wobei

- $E_v := \{e \in E \mid v \in e\}$  die Menge der in  $G$  mit  $v$  inzidierenden Kanten und
- $N_{v,u} := \{w \in V \setminus \{u\} \mid \{v, w\} \in E\}$  die Menge der in  $G$  zu  $v$  benachbarten Knoten  $\neq u$  ist.

[ Satz 6.1 operiert ggf. mit mehreren Kantenkontraktionen hintereinander.

Anregung: Oben wurde „alles an der Kante  $\{u, v\}$  Hängende auf  $u$  gelegt“. Überlegen Sie, wie man alternative Vorgehensweisen (informell entweder alles auf  $v$  oder, noch anders,  $u$  und  $v$  durch ein neues  $x$  ersetzen) formal hätte definieren können, und zeigen Sie, dass dabei jeweils „dasselbe“ bzw. genauer gesagt ein isomorpher Graph entstanden wäre. ]

## 6.6 Isomorphie

$f: a \mapsto u, b \mapsto w, c \mapsto x, d \mapsto r, e \mapsto v, f \mapsto t, g \mapsto s, h \mapsto y$  ist ein Isomorphismus, da sich damit auch alle 12 Kanten entsprechen, z.B.  $\{a, b\}$  und  $\{u, w\}$  wegen  $\{f(a), f(b)\} = \{u, w\}$  und analog die anderen 11.

## 6.7 Symmetriegruppe

|    |             |                                        |                          |
|----|-------------|----------------------------------------|--------------------------|
| a) | <u>Bez.</u> | <u>geometrische Analogie</u>           | <u>Zyklendarstellung</u> |
|    | <i>id</i>   | Identität                              | $\varepsilon$            |
|    | <i>R</i>    | 1/3 Rechtsdrehung                      | (123)(456)               |
|    | <i>Sh</i>   | Spiegelung an horizontaler Ebene       | (14)(25)(36)             |
|    | <i>L</i>    | 1/3 Linksdrehung                       | (132)(465)               |
|    | <i>S1</i>   | Spiegelung an vertikaler Ebene durch 1 | (23)(56)                 |
|    | <i>S2</i>   | Spiegelung an vertikaler Ebene durch 2 | (13)(46)                 |
|    | <i>S3</i>   | Spiegelung an vertikaler Ebene durch 3 | (12)(45)                 |
|    | <i>D14</i>  | halbe Drehung, die 14 nach 41 bringt   | (14)(26)(35)             |
|    | <i>D25</i>  | halbe Drehung, die 25 nach 52 bringt   | (16)(25)(34)             |
|    | <i>D36</i>  | halbe Drehung, die 36 nach 63 bringt   | (15)(24)(36)             |
|    | <i>ShR</i>  | <i>Sh</i> , gefolgt von <i>R</i>       | (153426)                 |
|    | <i>ShL</i>  | <i>Sh</i> , gefolgt von <i>L</i>       | (162435)                 |

[ Die anderen  $6! - 10$ , d.h. 710, Permutationen der Knoten 1 bis 6 bilden mindestens zwei nicht benachbarte Knoten auf benachbarte ab oder umgekehrt – was uns zur Suche nach schnelleren Methoden als der vollständigen Überprüfung aller Permutationen animieren könnte. Hier ein Tipp für eine: Der **komplementäre Graph** hat die gleichen Knoten und verbindet genau die im Original unverbundenen Kanten. Man zeigt leicht: Der komplementäre Graph hat stets die gleichen Automorphismen wie der ursprüngliche. Nun zeichnen wir das Komplement so wie rechts, und dessen Automorphismen sind leicht zu überblicken:

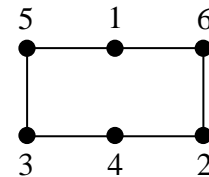

- Wohin wird 1 abgebildet?
- Und wohin sein Nachbar 6?
- Und wohin zwangsläufig der Rest?

]

|    |             |                              |                          |
|----|-------------|------------------------------|--------------------------|
| b) | <u>Bez.</u> | <u>geometrische Analogie</u> | <u>Zyklendarstellung</u> |
|    | <i>id</i>   | Identität                    | $\varepsilon$            |
|    | <i>R</i>    | 1/3 Rechtsdrehung            | (123)(456)               |
|    | <i>L</i>    | 1/3 Linksdrehung             | (132)(465)               |

Dass es keine weiteren Automorphismen gibt, ist hier leichter als in (a) einzusehen: 1, 2 und 3 sind die einzigen Knoten mit zwei eingehenden und einer ausgehenden Kante. Also müssen die drei untereinander abgebildet werden. Ein einfache Vertauschung (ein Zweierzyklus) ist kein Automorphismus, da dann im Bildraum die Kante zwischen beiden Bildknoten umgekehrt gerichtet ist. Es bleiben für 1, 2, 3 die Rotation um 0, 1/3 und 2/3, also *id*, *R* und *L*. Die Ausgangsknoten der von unten eintreffenden Kanten „müssen mitgenommen werden“ und sind dadurch mitbestimmt.

## 6.8 Vollständigkeit

Kombinatorisch betrachtet ist die Formel (#)  $|E| = (|V|^2 - |V|)/2$  für einen vollständigen schlingenfreien endlichen ungerichteten Graphen klar, da es sich bei der Kantenzahl um die Anzahl der möglichen ungeordneten Stichproben von je zweien aus den vorhandenen  $|V|$  Knoten handelt: Schließlich wird jeder der  $|V|$  Knoten mit jedem der anderen  $|V| - 1$  zusammen gebracht, ohne dass eine Reihenfolge zwischen beiden besteht.

Wir können uns (#) auch induktiv ableiten: Der Einfachheit halber seien  $1, 2, \dots, n$  die Knoten des vollständigen schlingenfreien endlichen ungerichteten Graphen, so dass  $|V| = n$  ist. In den Fällen  $n = 0$  und  $n = 1$  gilt wegen  $|E| = 0$  die Gleichung offensichtlich. Wir nehmen nun an, sie gilt für eine natürliche Zahl  $n$ . Sie gilt per Induktion allgemein, wenn wir zeigen, dass sie auch gilt, wenn wir von  $n$  zu  $n + 1$  übergehen. Zu den bisherigen Kanten kommt dabei je eine Kante zwischen dem neuen Knoten  $n + 1$  und jedem der bisherigen Knoten  $1, 2, \dots, n$  hinzu, das sind also  $n$  Kanten. Nun ist  $(n^2 - n)/2 + n$  aber genau so viel wie  $((n + 1)^2 - (n + 1))/2$ , und das ist (#) für  $n + 1$ .

Ist der Graph hingegen nicht vollständig, dann fehlen ihm Kanten gegenüber dem vollständigen Graphen, so dass seine Kantenzahl geringer als  $(n^2 - n)/2$  und somit davon verschieden ist.

## 6.9 Zyklen und Kreise

Wir führen den Beweis in gerichteten Graphen, in ungerichteten Graphen geht dies analog. Gegeben sei ein Zyklus  $Z_0 = v_1 v_2 v_3 \dots v_{n-1} v_n$  mit  $v_1 = v_n$ , d.h.  $v_n$  ist ein wiederholtes Vorkommen von  $v_1$  (nicht unbedingt das zweite). Mit  $v_1$  kommt also mindestens ein Knoten (mindestens) zweimal in  $Z_0$  vor. Sei  $v_{k1}$  das erste zweite Vorkommen eines Knotens im Zyklus, so dass also  $v_1 v_2 v_3 \dots v_{k1-1} v_{k1}$  keinen weiteren Knoten zweimal enthält. Sei  $v_{i1}$  das zugehörige erste Vorkommen des Knotens  $v_{k1}$ . Also ist entweder bereits  $Z_0$  ein Kreis (nämlich wenn  $v_1 = v_{k1} = v_{i1} = v_n$ ) – dann haben wir den Zyklus in einen Kreis zerlegt, oder es ist  $K_1 := v_{i1} v_{i1+1} \dots v_{k1-1} v_{k1}$  nur ein echter Teil von  $Z_0$  und damit ein Kreis, den wir in  $Z_0$  überspringen können. Dann ist  $Z_1 := v_1 \dots v_{i1-1} v_i v_{k+1} \dots v_{n-1} v_n$  ein Zyklus mit einer zu der von  $K_1$  disjunkten Kantenmenge. So wie  $v_{k1}, v_{i1}, K_1$  und  $Z_1$  konstruieren wir nun Schritt für Schritt  $v_{km}, v_{im}, K_m$  und  $Z_m$  für  $m = 2, 3, \dots$ , was aber nur endlich oft geht, sagen wir bis  $K_{max}$  und  $Z_{max}$ , woraufhin wir  $Z_0$  in die Kreise  $K_1, K_2, \dots, K_{max}, Z_{max}$  zerlegt haben, deren Kantenmengen paarweise disjunkt sind. Vollziehen Sie den Mechanismus vielleicht an folgendem Beispiel nach (Kantenrichtungen sind pro Kreis angedeutet):

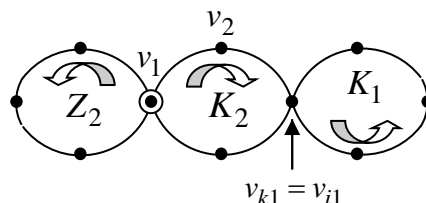

## 6.10 Weglängen-basierte Begriffe

- a) Radius: 3  
 Durchmesser: 3  
 Taillenweite: 7  
 alternative Zeichnung s. rechts

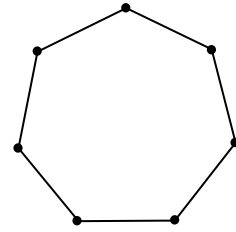

- b) Radius: 3  
 Durchmesser: 3  
 Taillenweite: 6  
 Dieser Graph ist als Heawood-Graph bekannt.

- c) Radius:  $n$   
 Durchmesser:  $n$   
 Taillenweite: 4  
 Hier sind  $Q_0$  bis  $Q_4$  skizziert:

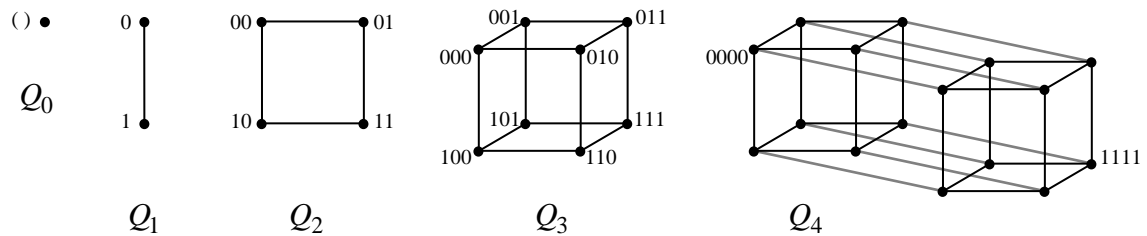

## 6.11 Weglängen-basierte Begriffe

Annahme (#):  $g(G) > 2 \cdot d(G) + 1$  für einen solchen Graphen  $G$

Unter den Kreisen in  $G$  muss es (mindestens) einen Kreis

$$K = v_1 v_2 \dots v_{g(G)} v_1 \quad (\text{mit } 1 \leq i < k \leq g(G) \Rightarrow v_i \neq v_k)$$

geben, nämlich einen mit der minimalen Länge aller Kreise in  $G$ . Nun sei  $n := 1 + \lceil g(G)/2 \rceil$ , wenn die Taillenweite eine gerade Zahl ist, andernfalls  $1 + \lceil (g(G) + 1)/2 \rceil$ .

$v_n$  liegt in  $K$  gewissermaßen „ganz oder weitestmöglich gegenüber“ von  $v_1$ . Nach der Definition von  $d(G)$  gibt es einen Pfad  $P$  in  $G$  von  $v_1$  nach  $v_n$  dessen Länge höchstens  $d(G)$  beträgt.

Gäbe es außer  $v_1$  und  $v_n$  gemeinsame Punkte von  $P$  und  $K$ , so gäbe es in  $G$  kleinere Kreise als  $K$ , im Widerspruch zur Wahl von  $K$ : Wäre z.B.  $1 \leq i \leq n$  und  $v_i$  auf  $P$ , und  $i$  minimal mit dieser Eigenschaft, so wäre der Weg von  $v_1$  nach  $v_i$  auf  $P$  und dann weiter auf  $K$  über  $v_{i-1}$  usw. bis nach  $v_1$  ein kleinerer Kreis als  $K$ , und analog auf der Gegenseite von  $K$  – vgl. rote „Kreise“ in der Abbildung links unten.

In  $K$  ist  $v_1 \dots v_n$  mindestens so lang wie  $v_n \dots v_{g(G)}$ , und beide sind länger als  $d(G)$ . Da nun  $K$  disjunkt zu  $P$  ist, kann man den Teil  $v_1 \dots v_n$  des Kreises  $K$  durch  $P$  ersetzen und erhält einen kürzeren Kreis, im Widerspruch zur Wahl von  $K$  – vgl. der grüne „Kreis“ in der Abbildung rechts unten.

Also ist die Annahme (#) falsch.

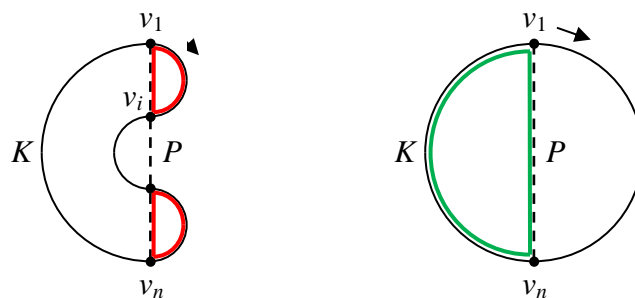

## 6.12 Zusammenhang

*Pfadzusammenhängend* bedeute: Jedes Knotenpaar ist über einen Pfad (Weg, der keine Knoten zweimal berührt) verbindbar. Da alle Pfade Wege sind, folgt Zusammenhang aus Pfadzusammenhang. Für die Gegenrichtung überlegen wir:

Seien  $v$  und  $w$  zwei Knoten eines zusammenhängenden Graphen. Dann existiert ein Weg

$v_1 v_2 v_3 \dots v_{n-1} v_n$  mit  $v_1 = v$ ,  $v_n = w$ .

- Ist der Weg  $v_1 v_2 v_3 \dots v_{n-1} v_n$  ein Pfad, so existiert ein Pfad von  $v$  nach  $w$ , ansonsten
- enthält der Weg  $v_1 v_2 v_3 \dots v_{n-1} v_n$  einen Knoten zweimal, also  $v_i = v_k$ . Dann ersetzen wir im Weg das Wegstück  $v_i v_{i+1} \dots v_k$  durch  $v_i$  und erhalten dadurch einen echt kürzeren Weg von  $v$  nach  $w$ , den wir nun mit echt kleinerem  $n$  als neue Folge  $v_1 v_2 v_3 \dots v_{n-1} v_n$  betrachten. Dann machen wir weiter bei (a).

Da man einen endlichen Weg nur endlich oft echt verkürzen kann, bzw. da die Werte von  $n$  eine streng fallende Folge natürlicher Zahlen durchlaufen, können wir nur endlich oft nach (b) gelangen, d.h. irgendwann ist  $v_1 v_2 v_3 \dots v_{n-1} v_n$  ein Pfad von  $v$  nach  $w$ .



### 6.13 Ein konkreter Hamiltonkreis

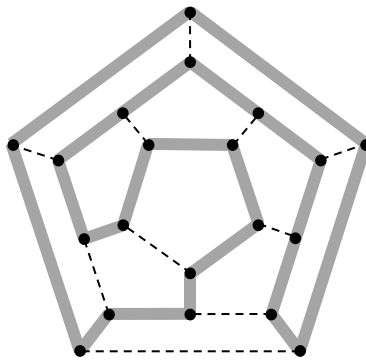

### 6.14 Hamiltonpfad-Algorithmus

Gegeben: ein nichtleerer endlicher Graph  $G = (V_0, E_0)$ .

Gesucht: ein Weg, der jeden Knoten genau einmal besucht bzw., wenn es keinen solchen Weg gibt, die Auskunft „kein Hamiltonpfad“.

Algorithmus H:

1. Für alle Knoten  $v_0$  in  $V_0$  [ nicht nur für einen, denn die Pfade können evtl. nicht überall beginnen ] führe aus:  
Hamiltonpfad( $V_0, E_0, v_0, "v_0"$ ).

2. Gib aus: „kein Hamiltonpfad“.

[ Wenn ein Hamiltonpfad existiert, wird der Algorithmus nicht bei (2) ankommen. ]

Dabei macht die Prozedur Hamiltonpfad( $V, E, v, p$ ) Folgendes:

- a.  $V' := V \setminus \{v\}$  [ $V'$  entsteht durch Streichen von  $v$  aus  $V$ . ]
- b. Ist  $V' = \emptyset$ , dann:
  - i. Gib  $p$  aus.
  - ii. Beende die Ausführung des Algorithmus H [ nach erfolgreicher Suche ].
- c. [ Wenn also  $V' \neq \emptyset$  ... ]  
Gibt es in  $E$  keine Kante  $\{v, w\}$  mit einem  $w \in V'$ , dann beende die Ausführung dieses Prozeduraufrufs von Hamiltonpfad.
- d. [ Wenn es also eine Kante von  $v$  nach  $V'$  gibt ... ]
  - i.  $E' := E \setminus \{\{v, w\} \mid w \in V\}$   
[  $E'$  entsteht durch Streichen aus  $E$  aller Kanten  $\{v, w\}$  mit  $w \in V$  aus  $E$ . ]
  - ii. Für alle  $w \in V$  mit  $\{v, w\} \in E$  führe der Reihe nach aus:  
Hamiltonpfad( $V', E', w, p \circ w$ ).

Um die Plausibilität des Algorithmus zu zeigen, führen wir ihn unter der schematischen Angabe möglicher Zwischenzustände an einem Beispielgraphen durch. Die Berechnung kann wegen des Nichtdeterminismus der Wahlen in (1) und (d.ii) sehr unterschiedlich ablaufen! Da mehrere Instanzen von *Hamiltonpfad* am Arbeiten sein können, gibt es oft mehrere aktuelle Datensätze der Prozeduraufrufe für Knoten- und Kantenmenge, Startknoten und bisherigen Pfad:

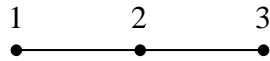

- Anfangs ist  $V_0 = \{1,2,3\}$ ,  $E_0 = \{12,23\}$  (mit Kurzschreibweise für Kanten)
- Nach der Wahl von  $v_0$  und dem (I.) Prozeduraufruf in (1) ist (z.B.)  
 $V_1 = \{1,2,3\}$ ,  $E_1 = \{12,23\}$ ,  $v_1 = 2$ ,  $p_2 = 2$ .
- Nach (I.a,b,c) und der Wahl von  $w$  und dem (II.) Prozeduraufruf in I.d.ii ist (z.B.)  
 $V_2 = \{1,3\}$ ,  $E_2 = \{ \}$ ,  $v_2 = 1$ ,  $p_2 = 21$ .
- Nach (II.a,b) endet (II) in (c).
- dem (III.) Prozeduraufruf in I.d.ii ist  $V_3 = \{1,3\}$ ,  $E_3 = \{ \}$ ,  $v_3 = 3$ ,  $p_2 = 23$ .
- Prozeduraufruf (III) endet analog ohne Output, damit aber auch Prozeduraufruf (I), also auch die Ausführung von (1) mit der Wahl von  $v_1 = 2$ .
- Nach der Wahl von  $v_0$  und dem (insgesamt IV.) Prozeduraufruf in (1) ist (z.B.)  
 $V_4 = \{1,2,3\}$ ,  $E_4 = \{12,23\}$ ,  $v_4 = 1$ ,  $p_4 = 1$ .
- Nach (IV.a,b,c) und der Wahl von  $w$  und dem (V.) Prozeduraufruf in IV.d.ii ist (z.B.)  
 $V_5 = \{2,3\}$ ,  $E_5 = \{23\}$ ,  $v_5 = 2$ ,  $p_5 = 12$ .
- Nach (V.a,b,c) und der Wahl von  $w$  und dem (VI.) Prozeduraufruf in V.d.ii ist (z.B.)  
 $V_6 = \{3\}$ ,  $E_6 = \{ \}$ ,  $v_6 = 1$ ,  $p_6 = 123$ .
- Nach (VI.a) mit  $V' := \{3\} \setminus \{3\}$  endet der Algorithmus in (VI.b) im Anschluss an die Ausgabe des Hamiltonpfades 123.

## 6.15 Hamiltonkreis

Sei  $G$  wie beschrieben.  $G$  habe  $n$  Knoten.

$G$  ist zusammenhängend:

Wäre dies nicht der Fall, bestünde  $G$  aus mindestens zwei Zusammenhangskomponenten (Zk.). Die kleinste Zk. könnte höchstens  $n/2$  Knoten und müsste mindestens einen Knoten  $u$  enthalten.  $u$  hätte dann höchstens  $(n/2)-1$  Nachbarn (in der Komponente, aber auch in  $G$ , da alle Nachbarn in  $G$  in der gleichen Zk. liegen) – im Widerspruch zu den Eigenschaften von  $G$ .

Sei  $p = v_0 v_1 \dots v_m$  ein Pfad maximaler Länge in  $G$ , so dass  $m+1 \leq n$  bzw.  $m < n$  ist. Wir zeigen, dass es ein  $0 \leq i \leq m-1$  derart gibt, dass (#)  $v_i$  Nachbar von  $v_m$  und  $v_{i+1}$  Nachbar von  $v_0$  ist:

Die Endpunkte  $v_0$  und  $v_m$  von  $p$  haben keine Nachbarn in  $G$  außerhalb von  $p$ , denn sonst könnte man  $p$  verlängern. Die Knoten  $v_0, \dots, v_{m-1}$  umfassen somit

- die mindestens  $n/2$  Nachbarn von  $v_m$  und
- die Vorgänger  $v_{n-r-1}$  in  $p$  der mindestens  $n/2$  Nachbarn von  $v_0$ .

Wären diese beiden Knotenmengen disjunkt, so würde  $v_0, \dots, v_{m-1}$  mindestens  $n$  Knoten umfassen, im Widerspruch zu  $m < n$ . Jedes  $v_i$  aus dem Durchschnitt der beiden Knotenmengen hat die gewünschten Eigenschaften.

Nun betrachten wir mit einem  $v_i$ , das (#) erfüllt, den Rundweg

$$c := v_0 v_1 \dots v_i v_m v_{m-1} \dots v_{i+1} v_0.$$

Er ist in der Abbildung **rot** unterlegt. Da  $p$  Pfad ist, durchläuft  $c$  keinen Punkt zweimal. Außerdem durchläuft  $c$  alle Knoten von  $G$ , denn sonst

- gäbe es einen Knoten  $u$  außerhalb von  $c$  und
- wegen des Zusammenhangs einen Weg von  $u$  nach  $v_0$ ,
- der sich zu einem Pfad verkürzen ließe (in der Abbildung **blau**),
- der in einem Knoten  $v_e$  erstmals auf einen Knoten des Kreises trifft,
- so dass es einen Pfad (**blau/rot**) von  $u$  nach  $v_e$  und dann in Laufrichtung des Kreises bis zum letzten Knoten in  $c$  vor  $v_e$  gäbe,
- der also länger als ein Pfad maximaler Länge wäre –
- und das kann nicht sein.

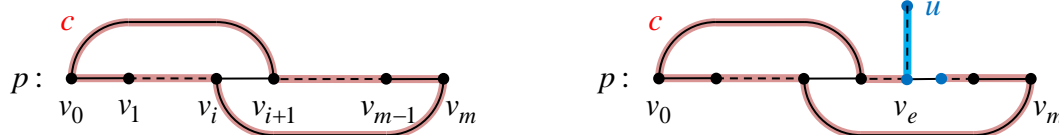

Somit ist  $c$  ein Hamiltonkreis in  $G$ .

## 6.16 Graphen und Relationen

Sei  $V$  die Knotenmenge des gerichteten Graphen und  $R$  seine Kantenmenge.

- irreflexiv,  $\forall v \in V \neg R(v, v)$
- $R = V \times V$ ,  $\forall u, v \in V R(u, v)$
- Es existiert eine Partition  $\{V_1, V_2\} \subseteq \mathbf{P}(V)$  derart, dass  $R \subseteq V_1 \times V_2 \cup V_2 \times V_1$

### 6.17 Präbäume

Der ungerichtete Graph  $G = (V, E)$  sei zusammenhängend, nach Entfernung einer beliebigen Kante aber nicht mehr. Wir zeigen, dass er kreisfrei ist.

Annahme (#): Es gibt einen Kreis  $vx_1x_2 \dots x_k v$  in  $G$ .

Dann sei  $G' := (V, E \setminus \{v, x_1\})$  der Graph, der durch Streichung der ersten Kante des Kreises aus  $G$  entsteht. Wir zeigen, dass auch  $G'$  zusammenhängend ist:

Seien  $u$  und  $w$  Knoten  $G'$ , also auch in  $G$ . Dann existiert (vgl. Aufgabe 6.12!) ein Pfad  $p$  von  $u$  nach  $w$  in  $G$ . Wenn  $p$   $vx_1$  bzw.  $x_1v$  nicht enthält, ist  $p$  auch in  $G'$  ein Pfad. Wenn  $p$   $vx_1$  enthält, ersetzt man jedes Vorkommen von  $vx_1$  bzw.  $x_1v$  durch  $vx_kx_{k-1} \dots x_1$  bzw.  $x_1x_2 \dots x_kv$  und erhält so einen Pfad  $u$  nach  $w$  in  $G'$ .

Der Zusammenhang von  $G'$  widerspricht jedoch den Voraussetzungen an  $G$ . Also muss die Annahme (#) falsch sein:  $G$  ist kreisfrei.

### 6.18 Präbäume

Gegeben sei ein Präbaum  $G = (V, E)$ . Die neue Kante sei  $\{v, w\}$ , so dass also  $v, w \in V$  und  $\{v, w\} \notin E$  gilt. Enthielte der erweiterte Graph  $G' = (V, E \cup \{v, w\})$  keinen Kreis, so wäre er kreisfrei und zusammenhängend, also auch ein Präbaum. Dann würde bei  $G'$  die Streichung von  $\{v, w\}$  zu  $G$  führen, das nach Satz 6.7(2) dann nicht mehr zusammenhängend, also kein Präbaum wäre – ein Widerspruch.

### 6.19 Äquivalenz gerichteter und ungerichteter Bäume

- a) Dies folgt aus (b), wie in Aufgabe 3.15 gezeigt wird.  
b) Zunächst haben
- für einen gerichteten Baum  $G$  die beiden Graphen  $G$  und  $Unger(G)$  und
  - für einen ungerichteten Baum  $H$  die beiden Graphen  $H$  und  $Ger(H)$
- per Konstruktion dieselbe Knotenmenge.

Übereinstimmung der Kantenmengen:

Sei  $\{u, v\}$  Kante in  $H$  und  $w$  die Wurzel von  $H$ . Für jeden Knoten  $x$  sei  $p_{w>x}$  der eindeutige Pfad von  $w$  nach  $x$ . Liegt  $v$  auf  $p_{w>u}$ , muss es Vorgänger von  $u$  sein, sonst könnte man in  $p_{w>u}$  das Endstück  $v \dots u$  durch das kürzere  $vu$  ersetzen und erhielte einen zweiten Pfad von  $w$  nach  $u$ . Liegt  $v$  nicht auf  $p_{w>u}$ , so ist  $p_{w>u}v = p_{w>v}$ . In beiden Fällen ist einer der beiden Knoten  $u$  und  $v$  der Vorgänger auf dem Pfad von  $w$  zum anderen. Also ist  $(u, v)$  Kante in  $Ger(H)$  und damit per Definition  $\{u, v\}$  Kante in  $Unger(Ger(H))$ .

Sei nun umgekehrt  $\{u, v\}$  Kante in  $Unger(Ger(H))$ . Dann ist per Definition  $(u, v)$  oder  $(v, u)$  Kante in  $Ger(H)$  und wiederum per Definition  $\{u, v\}$  Kante in  $H$ .

Übereinstimmung der Wurzeln:

Ist  $w$  als Wurzel von  $H$  ausgezeichnet, so gibt es im leeren Pfad von  $w$  nach  $w$  in  $H$  keinen Vorgänger, also per Definition in  $Ger(H)$  auch keine Kante  $(u, w)$ . Also kann nach Satz 6.6 kein anderer Knoten als  $w$  die Wurzel von  $Ger(H)$  sein.  $w$  ist also die Wurzel von  $Ger(H)$  und damit per Definition auch  $Unger(Ger(H))$ .

Insgesamt hat  $Unger(Ger(H))$  die gleichen Knoten und Kanten sowie die gleiche Wurzel wie  $H$ , ist also damit identisch.

Die Übereinstimmung der Kantenmengen und der Wurzeln von  $Ger(Unger(G))$  und  $G$  zeigt man in ähnlichen Schritten.

## 6.20 Adressenbäume

- a) wegen (1,3) auch ( ), (1), (1,1) und (1,2)  
und wegen (2,2,1) auch (2), (2,1) und (2,2).  
[ Grund: Kinder müssen Eltern haben, und deren Adresse ist das um die letzte Zahl verkürzte Anfangsstück der Adresse. Jüngere (rechte) Geschwister müssen ältere (linke) Geschwister haben, und deren Adresse ist die gleiche bis auf die um 1 niedrigere letzte Zahl. ]
- b) Man kann sich darauf beschränken, kinderlose jüngste Geschwister (bzw. Einzelkinder) anzugeben.

## 6.21 Spannäume

Ein Präbaum  $G$  ist gemäß der Definition der Spannbäume ein Spannbaum von  $G$ . Kann  $G$  noch einen anderen Spannbaum  $G'$  haben? Einem anderen Spannbaum  $G'$  von  $G$  müsste mindestens eine Kante von  $G$  fehlen. Dann wäre  $G'$  aber wegen Satz 6.7(ii) nicht zusammenhängend, obwohl er als Präbaum zusammenhängend sein müsste – ein Widerspruch. Also gibt es für einen Präbaum  $G$  nur genau einen Spannbaum, nämlich  $G$  selbst.

## 6.22 Spannbäume

- a)  b)  c) geht nicht d) 

## 6.23 Königs Lemma

Die Antwort ist „nein“.

Für die Frage „warum nicht?“ führen wir einen indirekten Beweis und nehmen zunächst an, die Antwort sei „ja“. Da man bei jedem Schritt einen Zettel wegnimmt, müssen (nach unendlich vielen Schritten) unendlich viele Zettel geschrieben worden sein. Wir betrachten jeden Zettel als Knoten eines Baums. Die Kinder eines Zettels sind die neuen Zettel, durch die er in einem Schritt auf dem Tisch ersetzt wurde. Jeder Zettel hat entweder Kinder (und dann endlich viele), oder er ist als Blatt des Baumes noch im Spiel. Wir definieren den Baum  $B_\infty$  „nach unendlich vielen Schritten“ als Vereinigung aller Knoten und aller Kanten der Bäume  $B_n$ , die nach jeweils  $n$  Schritten entstanden sind.  $B_\infty$  enthält unendlich viele Elternknoten, also unendlich viele Knoten. Nach dem Lemma von König muss es einen unendlichen Pfad geben. Die Knoten  $v_1, v_2, \dots$  des Pfades sind mit je einer natürlichen Zahl  $n_1, n_2, \dots$  beschriftet, deren jede echt kleiner als die vorige ist. Das kann aber nicht sein, da nach spätestens  $n_1$  Knoten in der Folge keine kleinere natürliche Zahl  $> 0$  mehr kommen kann. Also ist die Annahme falsch und die Antwort „nein“.

## 6.24 Polnische Notation und Syntaxbaum

- a) Der Algorithmus arbeitet mit einem Term *term* in polnischer Notation als Eingabe und gleichzeitig globales Datum, das in der Folge verändert werden darf, und mit einem globalen geordneten (Adressen-)Baum *baum*, der anfangs leer ist und zum Endergebnis ausgebaut werden soll.

- A. Lies *term*.
- B. Statte den Baum mit einem unbeschrifteten Wurzelknoten aus:  
 $baum := \{ ( ) - \}; wurz := ( )$ . / – bedeute: noch unbeschriftet /
- C. Führe Ausbauen(*wurz*) aus.

Dabei funktioniert die Prozedur **Ausbauen(*k*)** für jeden Knoten des aktuellen *baum* wie folgt:

1. Lies das erste Symbol *s* von *term* und entferne es vom Anfang von *term*.
  2. Beschrifte den aktuellen Knoten *k* mit *s*.
  3. Wenn *s* Variable ist, beende die Ausführung der laufenden Prozedur.
  4. Wenn *s* einstelliger Junktor (also  $\neg$ ) ist, dann ...
    - a. hänge mit einer neuen Kante einen neuen Knoten *kneu* als Kind an *k*;
    - b. führe Ausbauen(*kneu*) aus.
  5. Wenn *s* zweistelliger Junktor (also  $\wedge$  oder  $\vee$ ) ist, dann ...
    - a. hänge mit zwei neuen Kanten zwei neue Knoten *k1* und *k2* als erstes und zweites Kind an *k*;
    - b. führe Ausbauen(*k1*) aus;
    - c. führe Ausbauen(*k2*) aus.
- b) Entsprechend den Instanzen I, II etc. der Prozedur *Ausbauen* sind deren lokale Variablen indiziert.

- A.  $term = \vee \neg AB$ .
  - B.  $baum = \{ ( ) - \}; wurz = ( )$ .
  - C. I:  $k_I = ( )$ .
    - I.1:  $s_I = \vee$ ;  $term = \neg AB$ .
    - I.2:  $baum = \{ ( ) \vee \}$ .
    - I.3 und I.4 haben keine Auswirkung.
    - I.5a:  $baum = \{ ( ) \vee, (1) -, (2) - \}; k_{I1} = (1); k_{I2} = (2)$ .
    - I.5b: II:  $k_{II} = (1)$ .
      - II.1:  $s_{II} = \neg$ ;  $term_{II} = AB$ .
      - II.2:  $baum = \{ ( ) \vee, (1) \neg, (2) - \}$
      - II.3 hat keine Auswirkung.
      - II.4a:  $baum = \{ ( ) \vee, (1) \neg, (1,1) -, (2) - \}; kneu_{II} = (1,1)$ .
      - II.4b: III:  $k_{III} = (1,1)$ .
        - III.1:  $s_{III} = A$ ;  $term_{III} = B$ .
        - III.2:  $baum = \{ ( ) \vee, (1) \neg, (1,1) A, (2) - \}$
        - III.3: Ausbauen-Instanz III endet.
      - II.5 hat keine Auswirkung. Ausbauen-Instanz II endet.
    - I.5c: IV:  $k_{IV} = (2)$ .
      - IV.1:  $s_{IV} = B$ ;  $term_{IV} = \varepsilon$ .
      - IV.2:  $baum = \{ ( ) \vee, (1) \neg, (1,1) A, (2) B \}$
      - IV.3 Ausbauen-Instanz IV endet.
- Ausbauen-Instanz I endet.

Der Algorithmus endet; *baum* ist berechnet und kann ausgegeben werden.

### 6.25 Kürzester Weg

- a)
- 1:  $K = (1)$
  - 2:  $p(1) = 1, p(2) = p(3) = p(4) = 0$
  - 5:  $x = 2$
  - 4:  $u = 1, K = ()$
  - 5:  $x = 2$ 
    - i:  $p(2) = 1$
    - ii:  $-$
    - iii:  $K = (2)$
  - 5:  $x = 3$ 
    - i:  $p(3) = 1$
    - ii:  $-$
    - iii:  $K = (2, 3)$
  - 6, 3:  $-$
  - 4:  $u = 2, K = (3)$
  - 5, 6, 3:  $-$
  - 4:  $u = 3, K = ()$
  - 5:  $x = 4$ 
    - i:  $p(4) = 3$
    - ii:  $-$
    - iii:  $K = (2)$
  - 5:  $x = 3$ 
    - i:  $p(3) = 1$
    - ii:  $\text{Kantenfolge} = (1, 3, 4)$

- b)
- 1:  $K = (1)$
  - 2:  $p(1) = 1, p(2) = p(3) = 0$
  - 3:  $-$
  - 4:  $u = 1, K = ()$
  - 5:  $x = 2$ 
    - i:  $p(2) = 1$
    - ii:  $-$
    - iii:  $K = (2)$
  - 6, 3:  $-$
  - 4:  $u = 2, K = ()$
  - 5, 6:  $-$
  - 3: „unerreichbar“
