# Supplementary material
Source: publisher site journal article supplement (https://www.degruyterbrill.com/publication/isbn/9783111336107/downloadAsset/9783111336107_L%C3%B6sungen.zip)
Supplement: Supplementary file 7 [file Lsungen_Kapitel 8..pdf › Lsungen_Kapitel 8..pdf]

**Lösungen der Übungsaufgaben in  
Diskrete Mathematik kompakt  
(Bernd Baumgarten, De Gruyter, 2024)  
– Kapitel 8: Diskrete Wahrscheinlichkeitstheorie –**

Bitte beachten Sie:

- Versuchen Sie stets, die Aufgabe zunächst selbst zu lösen! Das Anschauen einer gelösten Übungsaufgabe *ohne vorherigen eigenen ernsthaften Bearbeitungsversuch* nützt Ihnen hinsichtlich des Lernerfolgs oft nicht mehr als der Genuss einer Tasse Kaffee: Es erzeugt einfach nur vorübergehend ein angenehmes Gefühl, hinterlässt aber keinen bleibenden Effekt.
- Zu jeder Aufgabe kann es verschiedene korrekte Lösungen bzw. Lösungswege und für jede Lösung mehrere Schreibweisen geben. Daher sind die in der Folge vorgestellten Lösungen durchweg nur als Beispiele zu verstehen.
- Zusätzliche Erklärungen stehen in eckigen Klammern [ ... ].
- Auch in Übungsaufgaben können Fehler stecken. Bitte beachten Sie die eventuelle Korrigenda-Datei des Verlages.

**8.1 Wahrscheinlichkeit und Ereignisse**

a) Es ist  $p(n) = p(1)/n$ , also wegen der sechs möglichen Ereignisse 1, 2, ..., 6

$$\begin{aligned} 1 &= \sum_{i=1}^6 p(i) &&= p(1) \cdot \left(1 + \frac{1}{2} + \frac{1}{3} + \frac{1}{4} + \frac{1}{5} + \frac{1}{6}\right) \\ &= \frac{p(1)}{60} \cdot (60 + 30 + 20 + 15 + 12 + 10) = \frac{p(1) \cdot 147}{60}, \end{aligned}$$

und damit

$$p(1) = \frac{60}{147}, p(2) = \frac{30}{147}, p(3) = \frac{20}{147}, p(4) = \frac{15}{147}, p(5) = \frac{12}{147}, p(6) = \frac{10}{147}.$$

b)

| Wahrscheinlichkeit | Ereignispaar(-menge)           |
|--------------------|--------------------------------|
| 90/147             | $\{\{1,2\}, \{1,3,6\}\}$       |
| 87/147             | $\{\{1,4,5\}, \{2,3,4,5,6\}\}$ |
| 75/147             | $\{\{1,4\}, \{2,3,4,6\}\}$     |
| 72/147             | $\{\{1,5\}, \{2,3,5,6\}\}$     |
| 60/147             | $\{\{1\}, \{2,3,6\}\}$         |
| 57/147             | $\{\{2,4,5\}, \{3,6,4,5\}\}$   |
| 45/147             | $\{\{2,4\}, \{3,6,4\}\}$       |
| 42/147             | $\{\{2,5\}, \{3,6,5\}\}$       |
| 30/147             | $\{\{2\}, \{3,6\}\}$           |

## 8.2 Bedingte Wahrscheinlichkeit und Unabhängigkeit

Aus der Definition von  $P(A | B)$  folgt  $P(A \cap B) = P(A | B) \cdot P(B)$ .

Daher gilt 
$$P(B|A) = \frac{P(A \cap B)}{P(A)} = \frac{P(A|B) \cdot P(B)}{P(A)} (\#).$$

zu (1)  $\Rightarrow$  (2): Sind  $A$  und  $B$  unabhängig, gilt (vgl. 8.3.1)  $P(A | B) = P(A)$

zu (2)  $\Rightarrow$  (3):  $P(A | B) = P(A)$ , eingesetzt in (#), liefert  $P(B | A) = P(B)$

zu (3)  $\Rightarrow$  (1): Aus  $P(B | A) = P(B)$  folgt  $P(B) = P(B | A) = P(A \cap B)/P(A)$ .

Vorn und hinten mit  $P(A)$  multipliziert folgt  $P(A \cap B) = P(A) \cdot P(B)$ , d.h.  $A$  und  $B$  sind dann unabhängig.

## 8.3 Bedingte Wahrscheinlichkeiten bei gestörter Übertragung

Von Verlusten war nicht die Rede, nur von Verfälschungen. Wir gehen hier davon aus, dass keine Zeichen verlorengehen, sondern höchstens wie angegeben umgewandelt werden.

Gegebene Wahrscheinlichkeiten ( $S \dots$  = Senden von  $\dots$ ,  $E \dots$  = Empfangen von  $\dots$ ):

|                            |                |                |
|----------------------------|----------------|----------------|
| Sendewahrscheinlichkeiten: | $P(S0)=3/5$    | $P(S1)=2/5$    |
| Übertragungstreue:         | $P(E0 S0)=5/6$ | $P(E1 S0)=1/6$ |
|                            | $P(E0 S1)=1/4$ | $P(E1 S1)=3/4$ |

Gesuchte Wahrscheinlichkeiten

- c)  $P(E1) = P(E1|S0) \cdot P(S0) + P(E1|S1) \cdot P(S1)$  – Satz 8.5  
 $= \frac{1}{6} \cdot \frac{3}{5} + \frac{3}{4} \cdot \frac{2}{5} = \frac{1}{10} + \frac{3}{10} = 0,4$
- a)  $P(S0|E1) = [P(E1|S0) \cdot P(S0)] / P(E1)$  – Satz 8.3  
 $= \frac{1}{6} \cdot \frac{3}{5} \cdot \frac{5}{2} = \frac{1}{4} = 0,25$
- d)  $P(E0) = P(E0|S1) \cdot P(S1) + P(E0|S0) \cdot P(S0)$  usw., aber auch ...  
 $= 1 - P(E1) = 0,6$
- b)  $P(S1|E0) = [P(E0|S1) \cdot P(S1)] / P(E0)$  – Satz 8.3  
 $= \frac{1}{4} \cdot \frac{2}{5} \cdot \frac{5}{3} = \frac{1}{6} = 0,1666 \dots$

Verifikation

|   |   |   |   |   |   |   |   |   |   |
|---|---|---|---|---|---|---|---|---|---|
| 1 | 1 | 1 | 1 | 0 | 0 | 0 | 0 | 0 | 0 |
| 0 | 1 | 1 | 1 | 1 | 0 | 0 | 0 | 0 | 0 |

Bei einer Umwandlung des durchschnittlichen Anteils der Symbole entsprechen die gesendeten und empfangenen Anteile den berechneten Wahrscheinlichkeiten.

## 8.4 Bedingte Wahrscheinlichkeit im mehrstufigen Versuch

- a) Lösung mit W-Baum:  
(F = fair, U = unfair,  $Z^3 = 3 \times \text{Zahl}$ ,  $Z^{012} = \text{weniger als } 3 \times \text{Zahl}$ )

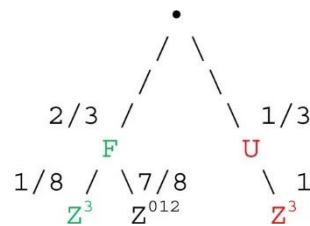

Die Gesamtwahrscheinlichkeit der Fälle mit  $3 \times \text{Zahl}$  (d.h. die Wahrscheinlichkeit des Ereignisses  $Z^3$ ) ist im Baum  $\frac{2}{3} \cdot \frac{1}{8} + \frac{1}{3} \cdot 1 = \frac{1}{12} + \frac{1}{3} = \frac{5}{12}$ . Die Wahrscheinlichkeit von  $3 \times \text{Zahl}$  über U ist  $\frac{1}{3}$ , das sind  $\frac{4}{5}$  von  $\frac{5}{12}$ .

Lösung mit Formeln:

$$P(B_k | A) = \frac{P(A | B_k) \cdot P(B_k)}{\sum_{i=1}^n P(A | B_i) \cdot P(B_i)}$$

Hier  $B_1 = U$ ,  $B_2 = F$ ,  $A = Z^3$ , also

$$P(U | Z^3) = \frac{P(Z^3 | U) \cdot P(U)}{P(Z^3 | F) \cdot P(F) + P(Z^3 | U) \cdot P(U)} = \frac{1 \cdot \frac{1}{3}}{\frac{1}{8} \cdot \frac{2}{3} + 1 \cdot \frac{1}{3}} = \frac{4}{5}.$$

- b) Beispielsweise könnte ein besonderes Verfahren existieren, die unfaire Münze unter besonderem Aufwand zu identifizieren. Wenn man dann bei vielen Versuchswiederholungen in allen Fällen von „Münzwahl und dreimal Zahl“ die gewählte Münze prüft (und später wieder unter die anderen mischt), dann sollte Sie in etwa 80% dieser Fälle die unfaire sein.

Wenn solch ein Verfahren nicht existiert, könnte man es näherungsweise durch 100-maliges Werfen emulieren, bei dem man eine Münze mit 100 mal Zahl für die unfaire erklärt. Wie berechtigt diese Vorgehen ist, sagt uns die sog. statistische Testtheorie.

## 8.5 Mehrstufigkeit, Zufall und Notwendigkeit

Selbstverständlich kann man das Ganze als 6-stufiges Zufallsexperiment in einem sehr großen W-Baum modellieren und durchrechnen.

Die lohnenswertere Alternative ist die Überlegung, dass sich nach je zwei Schritten wieder 7 Kugeln links und 11 Kugeln rechts befinden, also auch ganz am Ende. Was also zwischen Anfang und Ende an blauen Kugeln nach rechts gewandert ist, muss an roten Kugeln nach links gewandert sein (#)!

Die gesuchte Wahrscheinlichkeit ist somit 0, da sich unmöglich mehr rote Kugeln in der linken Urne als blaue Kugeln in der rechten befinden können.

Wem das zu (#) führende Argument zu knapp ist, der kann auch wie folgt rechnen: Am Ende enthält die linke Urne  $7 - 4 + 4 - 4 + 4 - 4 + 4$  Kugeln, d.h. 7 Stück – sagen wir  $b$  blaue und  $r$  rote – und die rechte  $11 + 4 - 4 + 4 - 4 + 4 - 4$  Kugeln, d.h. 11 Stück – sagen wir  $B$  blaue und  $R$  rote; außerdem ist die Gesamtzahl der blauen bzw. roten Kugeln die gleiche wie am Anfang. Das ergibt die vier Gleichungen:  $b + r = 7$ ,  $B + R = 11$ ,  $b + B = 7$ ,  $r + R = 11$ , aus denen  $B = 11 - R = r$ , also (#), leicht folgt.

## 8.6 Verknüpfung unabhängiger Zufallsexperimente

a.i) übungshalber nach verschiedenen Methoden:

1. brute force (rohe Gewalt)

systematisch alle (gleich wahrscheinlichen) Möglichkeiten nach Treffern absuchen

kkkk kkkz kkzk kkzz kzkk kzkk kzzk kzzz  
zkkk zkkz zkzk zkzz zkkk zzkz zzzk zzzz  $4/16 = \boxed{1/4}$

2. kreative dedizierte Idee

16 Möglichkeiten gibt es, und für das eine k gibt's 4 mögliche Positionen:  $4/16 = \boxed{1/4}$

3. Binomialverteilung (S. 399)

$$b(3 | 4, \frac{1}{2}) = \binom{4}{3} \cdot \left(\frac{1}{2}\right)^4 = \frac{4 \cdot 3 \cdot 2}{1 \cdot 2 \cdot 3} \cdot \frac{1}{4 \cdot 4} = \boxed{1/4}$$

a.ii) kkkk ist eine von 16 gleich wahrscheinlichen Möglichkeiten,  $P(kkkk) = \boxed{1/16}$ .

b.i) Es gibt  $6 \cdot 6 \cdot 6 = 216$  gleich wahrscheinliche Möglichkeiten, darunter die  $3! = 6$  Anordnungen von 1-2-3, also  $p = 6/216 = \boxed{1/36}$ .

b.ii) Unter den 216 gleich wahrscheinliche Möglichkeiten gibt es die 6 konstanten 111, 222, ..., 666, also  $p = 6/216 = \boxed{1/36}$ .

b.iii) Ähnlich wie (b.ii):  $p = \boxed{1/216}$ .

## 8.7 Geburtstagsphänomen

Die Wahrscheinlichkeit von  $n$  verschiedenen Geburtstagen von  $n$  Personen beträgt – wenn man sich die Personen durchnummeriert vorstellt, unter den gegebenen Annahmen für die erste Person  $1 = (365-0)/365$ , für die zweite  $(365-1)/365$ , für die dritte  $(365-2)/365$ , ... und für die  $n$ -te  $(365-(n-1))/365$ .

Nun ist  $P(n \text{ verschiedene}) = \prod_{n=0}^{n-1} \frac{365-n}{365}$  für  $n = 22$  größer und für  $n = 23$  kleiner als 0,5.

## 8.8 Überraschende mehrstufige Wahrscheinlichkeiten

Wir betrachten die Wahrscheinlichkeitsbäume beider Alternativen, links für  $W$ - $M$ - $W$ , rechts für  $M$ - $W$ - $M$ , wobei

- $W+$ / $W-$  bedeutet „Er gewinnt/verliert mit dem Würfel“,
- $M+$ / $M-$  bedeutet „Er gewinnt/verliert mit der Münze“.

Die Preis-Gewinnsituationen sind eingekreist.

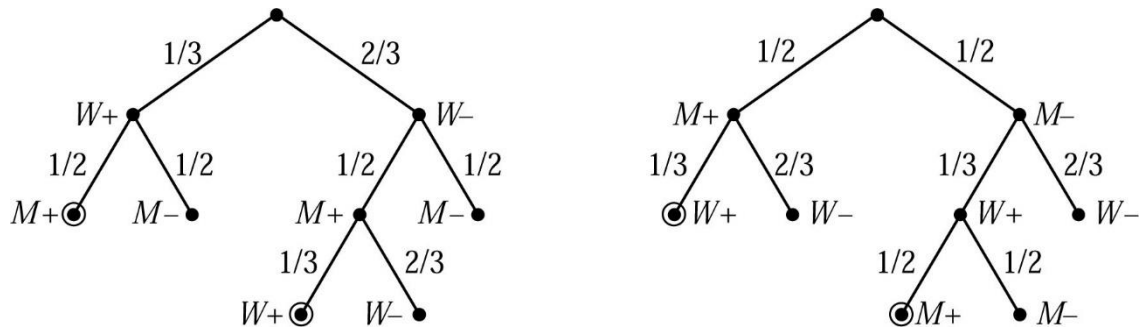

Wenn der Spieler mit dem Würfel beginnt (s. links), ist seine Erfolgschance

$$\frac{1}{3} \cdot \frac{1}{2} + \frac{2}{3} \cdot \frac{1}{2} \cdot \frac{1}{3} = \frac{5}{18}.$$

Wenn er mit der Münze beginnt (s. rechts), ist seine Erfolgschance

$$\frac{1}{2} \cdot \frac{1}{3} + \frac{1}{2} \cdot \frac{1}{3} \cdot \frac{1}{2} = \frac{1}{4} = \frac{5}{20},$$

also geringer. Er sollte mit dem Würfel anfangen.

Die „Tipps“ führen beide in die Irre.

## 8.9 Spielerfehlschluss

(1) und (2): Die Kugel hat kein Gedächtnis.

ODER: Die Wahrscheinlichkeit von RRRRRRRRRS ist genau so groß wie die Wahrscheinlichkeit von RRRRRRRRRR, nämlich (weniger als)  $1/1024$

ODER: RRRRRRRRRR ist zwar tatsächlich selten, aber hier geht es um die bedingte Wahrscheinlichkeit, nachdem bereits  $9 \times R$  bekannt ist, also (unter Vernachlässigung der Null)  $1/1024 : 1/512 = 1/2$

(3) Die Wahrscheinlichkeit von Rot bzw. Schwarz ist  $< 1/2$  wegen der grünen Null.

## 8.10 Erwartungswert beim Wichteln

Jeder vollständigen Geschenkeziehung entspricht genau eine Permutation  $\pi$  von  $\{1, 2, \dots, n\}$ : Teilnehmer  $i$  zieht das Geschenk von  $\pi(i)$ . Der erste zieht jedes Geschenk mit der Wahrscheinlichkeit  $1/n$ , der zweite jedes der verbleibenden mit der Wahrscheinlichkeit  $1/(n-1)$  usw., bis der letzte das verbliebene letzte Geschenk mit der Wahrscheinlichkeit 1 nimmt. Alle Permutationen sind also gleich wahrscheinlich mit der Wahrscheinlichkeit  $1/(n!)$ . Wir beschreiben die Permutationen durch die jeweilige Folge der Bilder von  $1, \dots, n$ , hier kurz ohne Komma, Klammern oder Leerzeichen

- a)  $n = 1$ : 1 zieht das Geschenk von 1. Also zieht durchschnittlich (da stets!) einer sein eigenes Geschenk:  $E_1 = 1$ .
- b)  $n = 2$ : Bei der Permutation 12 ziehen zwei Teilnehmer ihr eigenes, bei 21 null. Der Erwartungswert der Anzahl der „Selbstzieher“ (also der Fixpunkte der Permutationen in  $S_2$ ) ist  $E_2 = \frac{1}{2} \cdot 2 + \frac{1}{2} \cdot 0 = 1$ .
- c)  $n = 3$ : Die Paare (Permutation, Zahl der Fixpunkte) sind: (123,3), (132,1), (213,1), (231,0), (312,0), (321,1). Der Erwartungswert ist  $E_3 = (1/6) \cdot (3 + 1 + 1 + 0 + 0 + 1) = 1$ .
- d) Es macht keinen Spaß, analog zu (a, b, c) 7654! Permutationen von  $\{1, \dots, 7654\}$  auf Fixpunkte zu untersuchen. Zudem lassen die ersten Ergebnisse vermuten, dass das Ergebnis 1 kein Zufall sein könnte sondern allgemein gilt. Daher berechnen wir – allgemeiner als in (d) gefragt – den Erwartungswert für beliebige  $n$ .

Wir definieren für jedes  $k$  von 1 bis  $n$  die Zufallsvariable  $X_k$  auf  $S_n$ , die für eine Permutation  $\pi \in S_n$  genau dann 1 ist, wenn  $\pi(k) = k$ , sonst 0 (d.h. der in 1 und 0 ausgedrückte Wahrheitswert von „Bei der Ziehung gemäß  $\pi$  zieht Teilnehmer  $k$  sein eigenes Geschenk.“). Die weitere Zufallsvariable  $X$  auf  $S_n$  zähle die Anzahl der Fixpunkte der jeweiligen Permutation und ist daher die Summe aller  $X_k$ ,  $1 \leq k \leq n$ . Wegen der Linearität des Erwartungswertes (Satz 8.6) ist

$$E(X) = E\left(\sum_{k=1}^n X_k\right) = \sum_{k=1}^n E(X_k).$$

Jetzt fehlen uns nur noch die  $E(X_k) = P(X_k = 0) \cdot 0 + P(X_k = 1) \cdot 1 = P(X_k = 1)$ , d.h. die Antwort auf die Frage „Welcher Anteil der  $|S_n| = n!$  möglichen  $\pi \in S_n$  hat die Eigenschaft  $\pi(k) = k$ ?“ Permutationen mit  $\pi(k) = k$  sind nun dadurch bestimmt, wie sie die  $n-1$  Elemente von  $\{1, \dots, n\} \setminus \{k\}$  permutieren, und das geht auf genau  $|S_{n-1}| = (n-1)!$  Weisen. Es haben also für jedes  $k \in \{1, \dots, n\}$  genau  $(n-1)!$  von  $n!$  Permutationen den Fixpunkt  $k$ , ein Anteil von  $(n-1)!/n! = 1/n$ , und insgesamt ergibt sich

$$E(X) = \sum_{k=1}^n E(X_k) = \sum_{k=1}^n P(X_k = 1) = \sum_{k=1}^n 1/n = 1.$$

## 8.11 Erwartungswerte

Mit  $B$  für Bild und  $Z$  für Zahl ist

$$\begin{aligned} E(X_1) &= P(B, B) \cdot 0 + P(B, Z) \cdot 1 + P(Z, B) \cdot 1 + P(Z, Z) \cdot 1 = 0,75, \\ E(X_2) &= P(B, B) \cdot 0 + P(B, Z) \cdot 0 + P(Z, B) \cdot 0 + P(Z, Z) \cdot 1 = 0,25, \\ E(X_3) &= P(B, B) \cdot 0 + P(B, Z) \cdot 0 + P(Z, B) \cdot 0 + P(Z, Z) \cdot 1 = 0,25. \end{aligned}$$

Hier gilt

$$E(X_3) = 0,25 \neq 0,1875 = E(X_1) \cdot E(X_2).$$

## 8.12 Unabhängigkeit von Zufallsvariablen

- a) Das zeigt z.B. das gleichzeitige Werfen zweier unterscheidbarer Münzen (oder analog das zweimalige Werfen einer Münze) mit

- $\Omega = \{\text{Bild}, \text{Zahl}\}^2$  und  $\forall (x, y) \in \Omega \ P(x, y) = 1/4$
- $A_1 \text{ bzw. } 2 := \text{Münze 1 bzw. 2 zeigt Bild.}$
- $A_3 := \text{Eine Münze zeigt Bild, eine Zahl.}$
- Für  $i = 1, 2, 3 : X_i(x, y) := 1$ , wenn  $x \in A_i$ , andernfalls 0.

Dann gilt nämlich für alle  $i \neq k$  aus  $\{1, 2, 3\}$  und  $r, s \in \mathbb{R}$ :

$$P(X_i = r \wedge X_k = s) = P(X_i = r) \cdot P(X_k = s),$$

denn wenn  $r$  oder  $s$  weder 1 noch 0 ist, sind beide Seiten wegen Unmöglichkeit 0, ansonsten  $(r, s \in \{0, 1\})$  trifft die linke Bedingung jeweils auf genau ein Würfelergbnis mit  $P = 1/4$  zu, und alle rechten Einzelbedingungen haben  $P = 1/2$ , und das rechte Produkt ergibt  $1/4$ .

Trotzdem gilt

$$P(X_1 = X_2 = X_3 = 1) = P(\emptyset) = 0 \neq 1/8 = P(X_1 = 1) \cdot P(X_2 = 1) \cdot P(X_3 = 1).$$

- b) Sind in  $\Omega = \{1, 2, 3\}$  alle Ergebnisse gleich wahrscheinlich, und wir definieren die Zufallsvariablen  $X$  und  $Y$  auf  $\Omega$  durch  $X(n) := 2 - n$  und  $Y(n) := (3 - n) \cdot (n - 1)$ , so gilt

$$E(X) = (1 + 0 - 1)/3 = 0, \quad E(Y) = (2 \cdot 0 + 1 \cdot 1 + 0 \cdot 2)/3 = 1/3 \text{ und} \\ E(X \cdot Y) = E((1 - n)(2 - n)(3 - n)) = E(0) = 0 = 0 \cdot (1/3) = E(X) \cdot E(Y).$$

Trotzdem sind die Zufallsvariablen  $X$  und  $Y$  nicht unabhängig, denn

$$P(X = 1 \wedge Y = 1) = 0 \neq 1/9 = (1/3) \cdot (1/3) = P(X = 1) \cdot P(Y = 1).$$

## 8.13 Erwartungswerte und Varianz

- a)  $E(X) = (1 + 2 + 3 + 4 + 5 + 6) / 6 = 3,5$

$$V(X) = (2,5^2 + 1,5^2 + 0,5^2 + 0,5^2 + 1,5^2 + 2,5^2)/6 = 2,91\bar{6}$$

- b) Wir rechnen erst einmal nur für eine Karten„farbe“

$$E(X) = (11 + 10 + 4 + 3 + 2 + 3 \cdot 0)/8 = 3,75$$

Über alle vier Farben gezählt werden Zähler und Nenner viermal so groß – das Ergebnis bleibt.

$$V(X) = (7,25^2 + 6,25^2 + 0,25^2 + 0,75^2 + 3 \cdot 3,25^2)/8 \\ = (52,5625 + 39,0625 + 0,0625 + 0,5625 + 3 \cdot 14,0625)/8 \\ = 16,8046875$$

## 8.14 Kovarianz und Abhängigkeit

- a) 
$$\begin{aligned} \text{Cov}(X, Y) &= E[(X - E(X)) \cdot (Y - E(Y))] \\ &= E(XY - XE(Y) - E(X)Y + E(X)E(Y)) && \text{ausmultipliziert} \\ &= E(XY) - E(X)E(Y) - E(X)E(Y) + E(X)E(Y) && \text{wegen Linearität} \\ &= E(XY) - E(X)E(Y) \end{aligned}$$

- b)  $X$  und  $Y$  unabhängig  $\Leftrightarrow E(XY) = E(X)E(Y)$  Definition  
 $\Leftrightarrow \text{Cov}(X, Y) = 0$  wegen Teil (a)

- c) ... folgt unmittelbar aus der vorstehenden Lösung von Aufgabe 8.12.b.

### 8.15 Erwartungswert, Varianz und Kovarianz

- a)  $\Omega$  hat 36 Elemente, die Würfe  $(x,y) = (1,1), (1,2), \text{ usw. bis } (6,5), (6,6)$ . Wir sortieren  $\Omega$  hier [ Das muss nicht sein. ] nach den mögliche Produkten  $xy$  und lesen die Wahrscheinlichkeiten  $P(X = \dots)$  ab:

|   |                   |      |
|---|-------------------|------|
| 1 | 11                | 1/36 |
| 2 | 12, 21            | 1/18 |
| 3 | 13, 31            | 1/18 |
| 4 | 14, 22,<br>41     | 1/12 |
| 5 | 15, 51            | 1/18 |
| 6 | 16, 23,<br>32, 61 | 1/9  |

|    |                   |      |
|----|-------------------|------|
| 8  | 24, 42            | 1/18 |
| 9  | 33                | 1/36 |
| 10 | 25, 52            | 1/18 |
| 12 | 26, 34,<br>43, 62 | 1/9  |
| 15 | 35, 53            | 1/18 |
| 16 | 44                | 1/36 |

|    |        |      |
|----|--------|------|
| 18 | 36, 63 | 1/18 |
| 20 | 45, 54 | 1/18 |
| 24 | 46, 64 | 1/18 |
| 25 | 55     | 1/36 |
| 30 | 56, 65 | 1/18 |
| 36 | 66     | 1/36 |

- b) Wir sortieren [ wie in (a) freiwillig, nur um etwas Struktur im Wahrscheinlichkeitsraum nachzuvollziehen ] bei der Berechnung von  $E$  die Summanden aufsteigend nach den Wahrscheinlichkeiten  $P(X = \dots)$  ; dann erweitern wir auf 36-stel:

$$\begin{aligned}
 E(X) &= (1 + 9 + 16 + 25 + 36)/36 \\
 &\quad + (2 + 3 + 5 + 8 + 10 + 15 + 18 + 20 + 24 + 30)/18 \\
 &\quad + 4/12 + (6 + 12)/9 \\
 &= (87 + 270 + 12 + 72)/36 \\
 &= 441/36 \\
 &= 12,25
 \end{aligned}$$

- c) Die Tabelle aus (a), jedoch mit den Quadraten der  $X$ -Werte, ergibt

|    |      |
|----|------|
| 1  | 1/36 |
| 4  | 1/18 |
| 9  | 1/18 |
| 16 | 1/12 |
| 25 | 1/18 |
| 36 | 1/9  |

|     |      |
|-----|------|
| 64  | 1/18 |
| 81  | 1/36 |
| 100 | 1/18 |
| 144 | 1/9  |
| 225 | 1/18 |
| 256 | 1/36 |

|      |      |
|------|------|
| 324  | 1/18 |
| 400  | 1/18 |
| 576  | 1/18 |
| 625  | 1/36 |
| 900  | 1/18 |
| 1296 | 1/36 |

$$\begin{aligned}
 E(X^2) &= (1 + 81 + 256 + 625 + 1296)/36 \\
 &\quad + (4 + 9 + 25 + 64 + 100 + 225 + 324 + 400 + 576 + 900)/18 \\
 &\quad + 16/12 + (36 + 144)/9 \\
 &= (2259 + 5254 + 48 + 720)/36 \\
 &= 8281/36 \\
 &= 230,02\bar{7}
 \end{aligned}$$

- (b) liefert uns

$$(E(X))^2 = 12,25^2 = 150,0625 .$$

Nach dem Verschiebungssatz gilt:

$$\begin{aligned}
 V(X) &= E(X^2) - (E(X))^2 \\
 &= 230,02\bar{7} - 150,0625 \\
 &= 79,9652\bar{7} .
 \end{aligned}$$



- d) Für  $Cov(X, Y) = E[(X - E(X)) \cdot (Y - E(Y))]$  könnten wir für die 36 gleich wahrscheinlichen Ergebnisse aufzählen:

Wurf,  $X - E(X)$ ,  $Y - E(Y)$ ,  $(X - E(X)) \cdot (Y - E(Y))$   
 und  $Cov(X, Y)$  „zu Fuß“ aus seiner Definition ausrechnen. Wir können aber auch argumentieren, dass die Summe der 36 Produkte die Summe über 18 Summen der Art  $(1 - 3,5) \cdot (Y - E(Y)) + ((6 - 3,5) \cdot (Y - E(Y)))$  also der Form

$$\begin{aligned} & (X - 3,5) \cdot (Y - E(Y)) + ((7 - X) - 3,5) \cdot (Y - E(Y)) \\ &= (X - E(X)) \cdot (Y - E(Y)) - (X - E(X)) \cdot (Y - E(Y)) \\ &= 0 \end{aligned}$$

ist, also insgesamt 0 ergibt, was nach Division durch 36 den Wert

$$Cov(X, Y) = E[(X - E(X)) \cdot (Y - E(Y))] = 0 \quad \text{ergibt.}$$

Für  $Cov(X, Y) = E(XY) - E(X)E(Y)$  addieren wir zunächst alle  $X \cdot Y$ :

$$\sum_{i=1}^6 \sum_{k=1}^6 (i \cdot k) = \sum_{i=1}^6 (i \cdot (\sum_{k=1}^6 k)) = \sum_{i=1}^6 (i \cdot 21) = 21^2 = 441$$

Also ist  $Cov(X, Y) = 441/36 - 3,5 \cdot 3,5 = 12,25 - 12,25 = 0$

[ Allgemein haben zwei voneinander unabhängige Zufallsvariablen stets die Kovarianz 0, was letztlich (d) auf eine dritte Weise beantwortet. ]

## 8.16 Mehrstufige Wahrscheinlichkeiten und Übergangswahrscheinlichkeiten

Es handelt sich gemäß Spielregel immer wieder um ein zweistufiges Experiment, das vom Ausgangszustand abhängt. Betrachten wir beispielsweise den Ausgangszustand (RW,RW). Zunächst wird eine Kugel aus Urne 1 gezogen, die mit Wahrscheinlichkeit 1/2 rot bzw. weiß ist. Wenn es die rote ist, wird anschließend aus Urne 2 eine Kugel unter zwei roten und einer weißen Kugeln gezogen. Diese ist mit Wahrscheinlichkeit 2/3 rot. Dass in beiden Schritten die rote Kugel gezogen wird, also gewissermaßen in den verknüpften Experimenten (eine Kugel aus RW, dann eine Kugel aus RWW) das Ergebnis *rot-rot* stattfindet, hat daher die Wahrscheinlichkeit  $(1/2) \cdot (2/3) = 1/3$ . Analog überlegen wir, dass die Wahrscheinlichkeit für das Ergebnis *weiß-weiß* ebenfalls 1/3 beträgt.

Das Ereignis, dass beim Ausgangszustand (RW,RW) mit den beiden verknüpften Experimenten wieder der Zustand (RW,RW) erreicht wird, besteht nun genau aus den beiden Ergebnissen *rot-rot* und *weiß-weiß*, tritt also insgesamt mit der Wahrscheinlichkeit  $(1/3) + (1/3) = 2/3$  ein. Daraus resultiert der Eintrag „2/3“ im Tabellenfeld in der Zeile (RW,RW) (für den Ausgangszustand) und der Spalte (RW,RW) (für den Zielzustand).

Die folgenden drei W-Bäume zeigen für jeden der drei Ausgangszustände die Urneninhalte in den Knoten und die Wahrscheinlichkeiten für die einzelnen Schrittergebnisse an den Kanten.

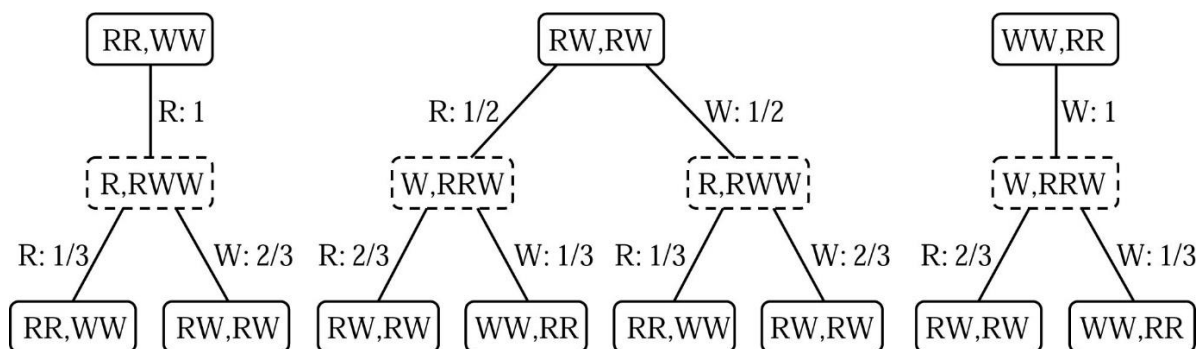

Daraus folgen durch Multiplikation der Wahrscheinlichkeiten der Teilschritte die Werte in Tab. 8.2 und Abb. 8.11.

## 8.17 Verdopplungsstrategie mit Variante

a) Am Wahrscheinlichkeitsbaum

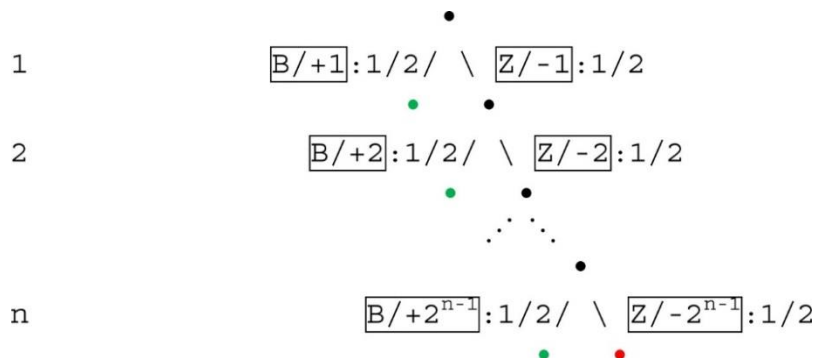

lesen wir ab:

Gewinnerwartung in Euro für gute Ausgänge (grüne Endpunkte):

$$\begin{aligned} & \frac{1}{2} \cdot 1 + \frac{1}{4} \cdot (-1 + 2) + \dots + \frac{1}{2^n} \cdot (-1 - 2 - \dots - 2^{n-2} + 2^{n-1}) \\ &= \frac{1}{2} \cdot 1 + \frac{1}{4} \cdot 1 + \dots + \frac{1}{2^n} \cdot 1 \\ &= \frac{1}{2} + \frac{1}{4} + \dots + \frac{1}{2^n} \\ &= 1 - \left(\frac{1}{2^n}\right), \end{aligned}$$

Gewinnerwartung in Euro für schlechten Ausgang (roter Endpunkt):

$$\begin{aligned} & \left(\frac{1}{2^n}\right)(-1 - 2 - \dots - 2^{n-1}) = -(2^n - 1)/2^n \\ &= -(1 - (1/2^n)), \end{aligned}$$

also Gewinnerwartung (alle Endpunkte): 0

[ Diesen formlosen Beweis kann man mit vollständiger Induktion untermauern. ]

b) Am Wahrscheinlichkeitsbaum

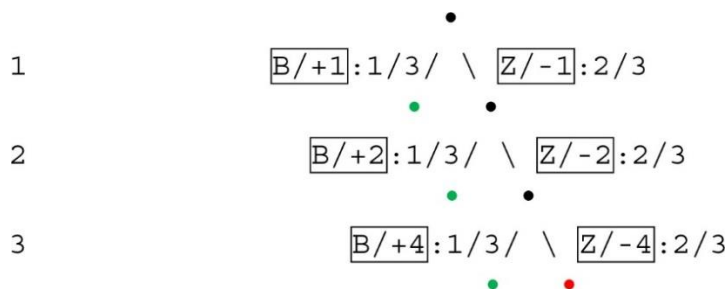

lesen wir (an den Endpunkten gegen den Uhrzeigersinn) eine Gewinnerwartung von

$$\frac{1}{3} \cdot 1 + \frac{2}{9} \cdot 1 + \frac{4}{27} \cdot 1 - \frac{8}{27} \cdot 7 = \frac{19 - 56}{27},$$

also einen durchschnittlich zu erwartenden Verlust von  $1, \overline{370}$  Euro ab.

[ Es ist schwer zu akzeptieren, dass der Spieler mit Wahrscheinlichkeit 1 gewinnt, wenn er nur einfach so lange spielt, bis er gewinnt. Zugegeben:

- Er hat einfach nicht die Mittel, beliebig hoch zu bieten, so dass er mit zwar kleiner, aber positiver Wahrscheinlichkeit entsprechend viel verlieren kann, so dass er summa summarum durchschnittlich nichts gewinnt, vgl. Beispiel in (a).
- Die Bank hat aber immer die Mittel, dagegen zu setzen, da sie in allen Schritten nur ihren ersten Euro benötigt plus die Summe, die der Spieler bislang gerade an sie verloren hat.

Trotzdem ist es schwer zu akzeptieren, dass der Spieler „im Unendlichen sicher gewinnt“, auch wenn man weiß, dass dieser Fall nie wirklich spielbar ist. Trost könnte hier die sogenannte *Nichtstandardanalysis* liefern, in der es (jeweils viele unterschiedliche) „unendlich kleine“ und „unendlich große“ Zahlen gibt. Der Fall, dass die Bank immer gewinnt, hätte dann (z.B. in a) vielleicht nicht die Wahrscheinlichkeit null, sondern einen unendlich kleinen Wert, der, multipliziert mit dem unendlich großen Verlust des Spielers in diesem Fall gerade den Euro aufwiegt, den der Spieler andernfalls fast sicher gewinnt. Doch leider scheint sich bislang noch kein Nichtstandardanalytiker mit dieser speziellen Frage befasst zu haben. ]

## 8.18 Ziegenproblem

Im Folgenden nennen wir das Tor, hinter dem sich das Auto befindet, Tor A und die beiden anderen B und C. WX bedeute, dass der Kandidat das Tor X wählt (mangels Vorwissen in  $1/3$  aller Fälle), ÖX bedeute, dass der Moderator das Tor X öffnet. B bedeute, der Kandidat *bleibt* bei seiner Wahl. Ä bedeute, er *ändert* seine Wahl und wählt das andere noch verschlossene Tor.

Wir gehen zunächst von der Moderator-Strategie 1 aus. Dann sieht der W-Baum (angereichert um strategische Alternativen und nicht gewählte Tore ganz unten.) so aus:

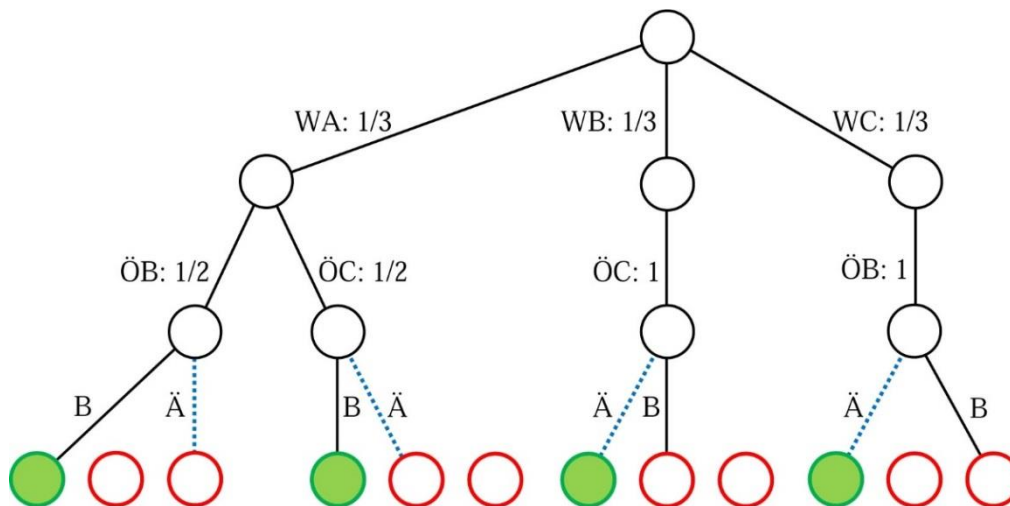

Dies sind also zwei W-Bäume übereinandergelagert (und um unerreichbare Knoten ergänzt): Der eine, mit den *gepunkteten* Linien im letzten Schritt, zeigt die Kandidatenstrategie, nach der Intervention des Moderators das *andere* geschlossene Tor zu wählen. Der andere, mit den *durchgezogenen* Linien, bedeutet, dass der Kandidat beim ursprünglich gewählten Tor *bleibt*. Alle letzten Schritte haben dann in ihrem jeweiligen Baum die Schritt Wahrscheinlichkeit 1.

Bei der Wechselstrategie Ä ist die Gesamtwahrscheinlichkeit der günstigen Endsituationen (grün, gefüllt):  $1/3 + 1/3 = 2/3$ . Bei der entgegengesetzten Bleibestrategie B wird das Auto nur mit einer Gesamtwahrscheinlichkeit von  $1/6 + 1/6 = 1/3$  gewonnen.

Verfolgt der Moderator Strategie 2, dann wählt der Kandidat wiederum mit Wahrscheinlichkeit  $1/3$  das richtige Tor. Hat er falsch gewählt, bleibt es dabei. Hat er richtig gewählt, erhält er vom Moderator lediglich noch die Gelegenheit, das fast gewonnene Auto durch einen Wechsel wieder zu verlieren. Mit der Bleibestrategie ist seine Gewinnchance  $1/3$ , mit der Wechselstrategie sage und schreibe 0.

Gehen wir davon aus, dass der Kandidat, wenn er wüsste, welcher Strategie der Moderator folgt, die für ihn günstigere aus Wechsel- oder Bleibestrategie verfolgt, dann hat er eine Gewinnchance von  $2/3$  bei Strategie 1 (mit Ä) und von  $1/3$  bei Strategie 2 (mit B). Täuscht sich der Kandidat und schreibt dem Moderator die jeweils andere Strategie zu, sinkt seine Gewinnchance auf  $1/3$  bei Strategie 1 und auf 0 bei Strategie 2.

### 8.19 Versuchsanzahlen als Versuchsergebnis

- a) Wir machen die Ergebnisfolgen etwas übersichtlicher, indem wir 0 für Bild und 1 für Zahl schreiben. Wir lösen (a) durch Abzählen der effektiven Ergebnisse:

$P_0(2) = P_1(2) = 0$  – mangels Positionen für zweimal 1

| W-Term   | $ \Omega $ | Treffermenge                                                           | W-keit |
|----------|------------|------------------------------------------------------------------------|--------|
| $P_2(2)$ | 4          | {11}                                                                   | 1/4    |
| $P_3(2)$ | 8          | {011, 101, 110}                                                        | 3/8    |
| $P_4(2)$ | 16         | {0011, 0101, 0110, 1001, 1010, 1100}                                   | 3/8    |
| $P_5(2)$ | 32         | {00011, 00101, 00110, 01001, 01010, 01100, 10001, 10010, 10100, 11000} | 5/16   |

Ein anderer Lösungsweg ist die Anwendung der Binomialverteilung

$$P_n(k) = \binom{n}{k} / 2^n = \frac{n \cdot (n-1) \cdot \dots \cdot (n-k+1)}{1 \cdot 2 \cdot \dots \cdot k \cdot 2^n}, \text{ für } k = 2 \text{ also}$$

$$\frac{n \cdot (n-1)}{1 \cdot 2 \cdot 2^n} = \frac{n \cdot (n-1)}{2^{n+1}}, \text{ für } n = 2, 3, 4, 5 \text{ also } \frac{2 \cdot 1}{8}, \frac{3 \cdot 2}{16}, \frac{4 \cdot 3}{32} \text{ und } \frac{5 \cdot 4}{64}.$$

- b) Ein Erfolgsfall entspricht einer 0-1-Folge mit  $k-1$  Einsen auf den  $n-1$  ersten Stellen und dann einer 1. Die beiden Eigenschaften (Ereignisse) sind unabhängig und haben (vgl. (a)!) die Wahrscheinlichkeiten

$$P_{n-1}(k-1) = \binom{n-1}{k-1} / 2^{n-1} \text{ und } \frac{1}{2}, \text{ also } Q_n(k) = \binom{n-1}{k-1} / 2^n.$$

[ Test mit  $n = 5$  und  $k = 2$  : Die 4 Treffer aus 32 Folgen finden sich oben in der Tabellenzeile für 5, und  $\binom{4}{1} / 2^5 = 4/32$  . ]

- c)  $k$  Einsen bis zur Stelle  $n$  bedeutet  
entweder  $k$  Einsen bis zur Stelle  $n-1$  und dann eine Null  
oder (sofern  $k > 0$ )  $k-1$  Einsen bis zur Stelle  $n-1$  und dann eine Eins.

Also – vgl. Teil (a) – für  $k, n \geq 0$ :

$$P_n(k) = \begin{array}{llll} \text{IF} & k > n & \text{THEN} & 0 \\ \text{ELSE IF} & k = 0 & \text{THEN} & 1/2^n \\ \text{ELSE} & & & (P_{n-1}(k-1) + P_{n-1}(k)) / 2 \end{array}$$

### 8.20 Binomialverteilung

Erfolg bei einem Wurf bedeutet hier 1 oder 4, tritt also mit  $P = 2/6 = 1/3$  ein.

Nach Abschnitt 8.5.2 ist die gesuchte Erfolgswahrscheinlichkeit

$$b(k | n, p) = \binom{n}{k} p^k (1-p)^{n-k} \text{ für } n = 4, k = 3, p = 1/3, \text{ also}$$

$$b(3 | 4, 1/3) = \frac{4 \cdot 3 \cdot 2}{1 \cdot 2 \cdot 3} \cdot \frac{1}{3^3} \cdot \frac{2}{3} = \frac{8}{81} \approx 0,099$$

Der wirtschaftliche Erwartungswert ist also etwa  $0,1 \cdot 6 - 9 \cdot 1$  Euro pro Spiel, d.h. sie verliert jedesmal durchschnittlich ca. 30€.

## 8.21 Binomialverteilung und bedingte Wahrscheinlichkeiten

- a) Die genaue Berechnung führt zu zahlreichen „krummen“ Zahlen wie 21249999 / 84999999, da nach der ersten gewählten Person der Rest nicht mehr zu genau 75% blaue Augen hat.
- b) Man setzt die Wahrscheinlichkeit in Deutschland weiter auf 75%, auch wenn einer bis drei Einwohner fehlen:

$$P = \binom{4}{3} \cdot \left(\frac{3}{4}\right)^3 \cdot \left(\frac{1}{4}\right)^1 = \frac{4 \cdot 3 \cdot 2 \cdot 27}{1 \cdot 2 \cdot 3 \cdot 64 \cdot 4} = \frac{27}{64} \approx 0,422$$

Dass die behauptete Genauigkeit erreicht wird, zeigt eine Betrachtung zur Fehlerfortpflanzung, die unter diesem Stichwort z.B. in Wikipedia gut erläutert ist.

- c) Die Auswahl von 4 aus 10 aus allen entspricht einer Auswahl von 4 aus allen. [ Warum? ]

A, B steht für die beiden Räume, 4b für 4 Blonde.

$$P(A) = P(B) = 1/2$$

$$P(4b | A) = 0,9^4 = 0,6561$$

$$P(4b | B) = 0,75^4 = 0,31640625$$

$$P(4b) = P(4b | A) \cdot P(A) + P(4b | B) \cdot P(B)$$

$$P(A | 4b) = \frac{P(4b | A) \cdot P(A)}{P(4b | A) \cdot P(A) + P(4b | B) \cdot P(B)}$$

$$= \frac{0,6561}{0,6561 + 0,31640625} \approx 0,67465$$

eines von 2 Zimmern

angenähert wie unter (b)

angenähert wie unter (b)

zweistufiges Experiment

Bayes'sche Formel

Bruch mit 1/2 gekürzt

## 8.22 Poisson-Verteilung

Nach dem Verschiebungssatz gilt  $V_\lambda(X) = E_\lambda(X^2) - (E_\lambda(X))^2$ . Nun ist

$$\begin{aligned} E_\lambda(X^2) \cdot e^\lambda &= \sum_{k=0}^{\infty} k^2 \frac{\lambda^k}{k!} = \sum_{k=0}^{\infty} k \frac{\lambda^k}{(k-1)!} = \sum_{k=1}^{\infty} (k-1) \frac{\lambda^k}{(k-1)!} + \sum_{k=1}^{\infty} (k) \frac{\lambda^k}{(k-1)!} \\ &= \sum_{k=2}^{\infty} \frac{\lambda^k}{(k-2)!} + \sum_{k=1}^{\infty} \frac{\lambda^k}{(k-1)!} = \lambda^2 \sum_{k=2}^{\infty} \frac{\lambda^{k-2}}{(k-2)!} + \lambda \sum_{k=1}^{\infty} \frac{\lambda^{k-1}}{(k-1)!} \\ &= \lambda^2 \sum_{k=0}^{\infty} \frac{\lambda^k}{k!} + \lambda \sum_{k=0}^{\infty} \frac{\lambda^k}{k!} = (\lambda^2 + \lambda) \cdot e^\lambda \end{aligned}$$

## 8.23 Bernoulli-Prozess und geometrische Verteilung

Der Betrieb der Waschmaschine ist ein Prozess mit jährlich einem Bernoulli-Experiment, dessen „Erfolgs“-Wahrscheinlichkeit (Erfolg = Maschine geht kaputt) ist stets  $p = 0,05$ .  $X$  sei die Anzahl der Jahre bzw. Versuche bis zum „Erfolg“ (dem Auftreten eines Defektes). Die Maschinen überleben 1 Jahr mit  $q = 0,95$ .

- a)  $(Q(X > 2) = q^2 = 0,95^2 = 0,9025, \text{ d.h. } 90,25\%,$   
 $(Q(X > 3) = q^3 = 0,95^3 = 0,857375, \text{ d.h. ca. } 85,74\%$

- b) Nennen wir die gesuchte Zahl  $m$ , so gilt  
 $(Q(X > m) = 0,95^m \leq 0,5 < 0,95^{m+1} = (Q(X > m+1)$   
 $0,95^{13} = 0,51 \text{ und } 0,95^{14} = 0,49, \text{ also nach } m = 14 \text{ Jahren}$

- c)  $E(X) = 1/p = 20$  : Die Maschinen laufen durchschnittlich 20 Jahre ohne Mängel.

[ Der Unterschied zwischen (b) und (c) ist im Internet unter *Median* erläutert. ]

## 8.24 Hypergeometrische Verteilung

- a) Es gibt  $\binom{4}{4} = 1$  Möglichkeit(en), die 4 Buben des 10er-Blattes aus insgesamt 4 Buben auszuwählen, sowie  $\binom{28}{6} = 376740$  Möglichkeiten, die 6 Nicht-Buben des 10er-Blattes aus den insgesamt 28 Nichtbuben auszuwählen. Das ergibt insgesamt die Wahrscheinlichkeit:

$$\begin{aligned} h(4 | 32, 10, 4) &= \binom{4}{4} \cdot \binom{28}{6} / \binom{32}{10} \\ &= \frac{28 \cdot 27 \cdot 26 \cdot 25 \cdot 24 \cdot 23 \cdot 1 \cdot 2 \cdot 3 \cdot 4 \cdot 5 \cdot 6 \cdot 7 \cdot 8 \cdot 9 \cdot 10}{1 \cdot 2 \cdot 3 \cdot 4 \cdot 5 \cdot 6 \cdot 32 \cdot 31 \cdot 30 \cdot 29 \cdot 28 \cdot 27 \cdot 26 \cdot 25 \cdot 24 \cdot 23} \\ &= \frac{7 \cdot 3}{4 \cdot 31 \cdot 29} = \frac{21}{3596} \end{aligned}$$

d.h. ca. 0,584%.

$$\begin{aligned} b) \quad h(3 | 32, 6, 6) &= \binom{6}{3} \cdot \binom{43}{3} / \binom{49}{6} \\ &= \frac{6 \cdot 5 \cdot 4 \cdot 43 \cdot 42 \cdot 41 \cdot 1 \cdot 2 \cdot 3 \cdot 4 \cdot 5 \cdot 6}{1 \cdot 2 \cdot 3 \cdot 1 \cdot 2 \cdot 3 \cdot 49 \cdot 48 \cdot 47 \cdot 46 \cdot 45 \cdot 44} \\ &= \frac{5 \cdot 43 \cdot 41}{7 \cdot 47 \cdot 46 \cdot 3 \cdot 11} = \frac{8815}{499422} \end{aligned}$$

d.h. ca. 1,765%

## 8.25 Eine Markow-Kette als W-Baum

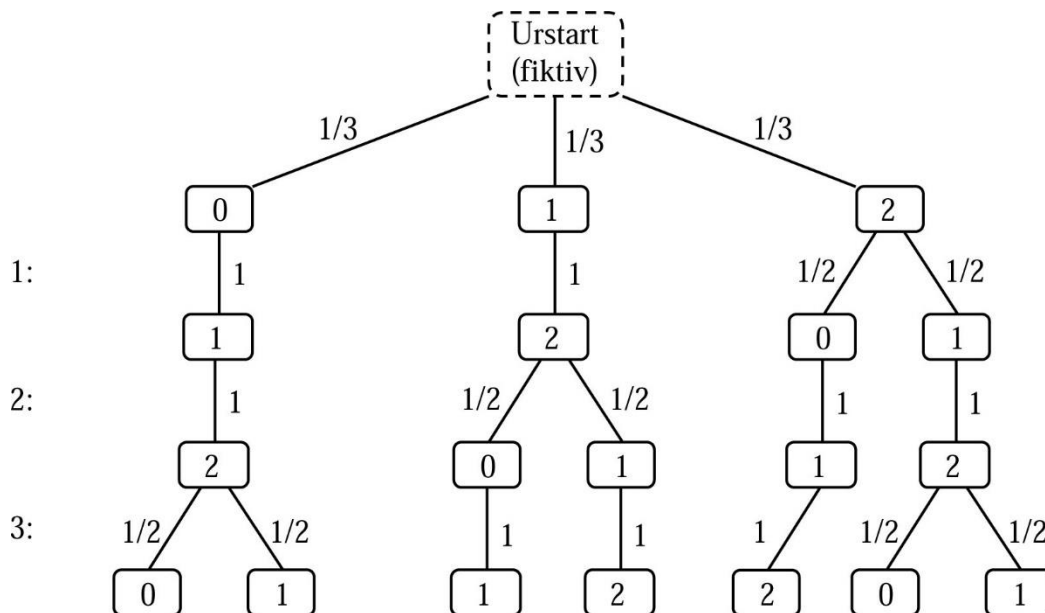

Die Zustandswahrscheinlichkeiten nach 3 Schritten sind

$$\text{für 0: } \frac{1}{3} \cdot \frac{1}{2} + \frac{1}{3} \cdot \frac{1}{2} \cdot \frac{1}{2} = \frac{1}{4} \quad \text{für 1: } \frac{1}{3} \cdot \frac{1}{2} + \frac{1}{3} \cdot \frac{1}{2} + \frac{1}{3} \cdot \frac{1}{2} \cdot \frac{1}{2} = \frac{5}{12} \quad \text{für 2: } \frac{1}{3} \cdot \frac{1}{2} + \frac{1}{3} \cdot \frac{1}{2} = \frac{1}{3}$$

[ Das ergeben natürlich auch die entsprechenden Matrixmultiplikationen:

$$\begin{pmatrix} 1 & 1 & 1 \\ 3 & 3 & 3 \end{pmatrix} \begin{pmatrix} 0 & 1 & 0 \\ 0 & 0 & 1 \\ 1/2 & 1/2 & 0 \end{pmatrix}^3 = \begin{pmatrix} 1 & 5 & 1 \\ 4 & 12 & 3 \end{pmatrix} ]$$

## 8.26 Soziale Mobilität als Markow-Kette

Die Verteilungswerte sind unten auf 2 Stellen hinter dem Komma gerundet. Die Verteilungswerte nach 3 Jahren erhält man z.B. durch  $((\mathbf{v}P)P)P$  mit dem Zeilenvektor  $\mathbf{v}$  der Anfangsverteilung und der Übergangsmatrix  $P = P_A, P_B$  oder  $P_C$ . Die Werte nach 100 Jahren erhält man näherungsweise z.B. mit Matrizensoftware (evtl. online, z.B. bei <https://www.matopt.de/werkzeuge/grundlagen/matrixmultiplikation.html>) oder – unter der berechtigten Annahme, dass die Matrizenpotenzen rasch genug konvergieren und bei Regularität – durch Berechnung des Eigenvektors  $\mathbf{p}$  (vgl. Satz 8.17). Leider ist  $P_B$  nicht regulär, wie man an den Eigenvektoren  $(1,0,0,0,0)$  und  $(0,0,0,0,1)$  sieht (vgl. Satz 8.17). Der Eigenvektor bei Celand ist  $(3,1,1,1,1)/7$ .

| <b>Aland: <math>P_A</math></b> | Un  | Um  | Mi  | Om  | Ob  |
|--------------------------------|-----|-----|-----|-----|-----|
| Un                             | 0,8 | 0,2 | 0   | 0   | 0   |
| Um                             | 0   | 0,8 | 0,2 | 0   | 0   |
| Mi                             | 0   | 0   | 0,8 | 0,2 | 0   |
| Om                             | 0   | 0   | 0   | 0,8 | 0,2 |
| Ob                             | 0,2 | 0   | 0   | 0   | 0,8 |

| <b>Aland</b> | Un  | Um  | Mi  | Om  | Ob  |
|--------------|-----|-----|-----|-----|-----|
| Jahr 0       | 0,2 | 0,2 | 0,2 | 0,2 | 0,2 |
| Jahr 3       | 0,2 | 0,2 | 0,2 | 0,2 | 0,2 |
| Jahr 100     | 0,2 | 0,2 | 0,2 | 0,2 | 0,2 |

| <b>Beland: <math>P_B</math></b> | Un  | Um  | Mi  | Om  | Ob  |
|---------------------------------|-----|-----|-----|-----|-----|
| Un                              | 1   | 0   | 0   | 0   | 0   |
| Um                              | 0,2 | 0,8 | 0   | 0   | 0   |
| Mi                              | 0   | 0,2 | 0,6 | 0,2 | 0   |
| Om                              | 0   | 0   | 0   | 0,8 | 0,2 |
| Ob                              | 0   | 0   | 0   | 0   | 1   |

| <b>Beland</b> | Un   | Um   | Mi   | Om   | Ob   |
|---------------|------|------|------|------|------|
| Jahr 0        | 0,2  | 0,2  | 0,2  | 0,2  | 0,2  |
| Jahr 3        | 0,28 | 0,18 | 0,07 | 0,18 | 0,28 |
| Jahr 100      | 0,50 | 0    | 0    | 0    | 0,50 |

| <b>Celand: <math>P_C</math></b> | Un  | Um  | Mi  | Om  | Ob  |
|---------------------------------|-----|-----|-----|-----|-----|
| Un                              | 0,9 | 0   | 0   | 0   | 0,1 |
| Um                              | 0,3 | 0,7 | 0   | 0   | 0   |
| Mi                              | 0   | 0,3 | 0,7 | 0   | 0   |
| Om                              | 0   | 0   | 0,3 | 0,7 | 0   |
| Ob                              | 0   | 0   | 0   | 0,3 | 0,7 |

| <b>Celand</b> | Un   | Um   | Mi   | Om   | Ob   |
|---------------|------|------|------|------|------|
| Jahr 0        | 0,2  | 0,2  | 0,2  | 0,2  | 0,2  |
| Jahr 3        | 0,31 | 0,2  | 0,2  | 0,17 | 0,12 |
| Jahr 100      | 0,43 | 0,14 | 0,14 | 0,14 | 0,14 |

## 8.27 Stochastische Matrizen

In der Definition der zeilenstochastischen Matrizen muss man  $p_{ik} \leq 1$  nicht explizit fordern, denn wegen generell  $p_{ik} \geq 0$  kann ohnehin keine Komponente  $>1$  sein, sonst hätte die Zeile  $i$  eine Summe  $>1$ .

a) Zwei Lösungswege – weil sie beide so hübsch sind (vgl. Text, Abschnitt 1.4):

(1) Seien  $A = (a_{ij})$  und  $B = (b_{jk})$  zeilenstochastische  $n \times n$ -Matrizen, d.h.

$$\forall 1 \leq i \leq n \quad (a_{ij} = 1 \wedge \forall 1 \leq j \leq n \quad a_{ij} \geq 0), \text{ und analog mit } b_{jk}.$$

Sei  $(c_{ik}) = C = AB$ . Als Summen von Produkten von Zahlen  $\geq 0$  sind die Matrixkomponenten  $c_{ik} \geq 0$ . Ferner gilt für alle Zeilen ( $1 \leq i \leq n$ ) von  $C$ :

$$\sum_{k=1}^n c_{ik} = \sum_{k=1}^n \sum_{j=1}^n a_{ij} b_{jk} = \sum_{j=1}^n a_{ij} \sum_{k=1}^n b_{jk} = 1 \cdot 1 = 1.$$

(2) Ist  $\mathbf{1}$  der „konstante“  $n$ -dimensionale Vektor mit allen Komponenten  $=1$ , so ist für jede Matrix  $A$  das Produkt  $A\mathbf{1}$  der Spaltenvektor der Zeilensummen von  $A$ . Also ist  $A$  genau dann zeilenstochastisch, wenn  $A\mathbf{1} = \mathbf{1}$ . Sind  $A$  und  $B$  zeilenstochastisch, so gilt

$$(AB)\mathbf{1} = A(B\mathbf{1}) = A\mathbf{1} = \mathbf{1},$$

und damit ist auch  $AB$  zeilenstochastisch.

b) Das folgt aus dem zweiten Lösungsweg oben:  $A\mathbf{1} = 1 \cdot \mathbf{1}$ , und damit kennen wir auch gleich einen Eigenvektor.

c) Es seien  $A = (a_{ij})$  zeilenstochastisch,  $\lambda \in \mathbb{R}$ ,  $\mathbf{v} \neq 0$ , und es gelte  $A\mathbf{v} = \lambda\mathbf{v}$ . Ferner sei die betragsmäßig größte Komponente von  $\mathbf{v}$   $v_{i_0} = 1$  (was sich spätestens nach Division durch diese Komponente ( $\neq 0$ ) einstellt, wobei der Eigenvektor ja Eigenvektor bleibt). Dann gilt wegen der genannten Eigenschaften von  $A$  und  $\mathbf{v}$ :

$$\begin{aligned} |\lambda| &= |\lambda v_{i_0}| = |(A\mathbf{v})_{i_0}| = |a_{i_0 1} v_1 + a_{i_0 2} v_2 + \dots + a_{i_0 n} v_n| \\ &\leq |a_{i_0 1} v_1| + |a_{i_0 2} v_2| + \dots + |a_{i_0 n} v_n| \leq |a_{i_0 1}| + |a_{i_0 2}| + \dots + |a_{i_0 n}| = 1. \end{aligned}$$

## 8.28 Absorbierende Zustandsmengen in Markow-Ketten

$(p_{ik})$  sei die Übergangsmatrix der Markow-Kette mit  $n$  Zuständen  $1, 2, \dots, n$ , und  $M$  sei eine Teilmenge von  $\{1, 2, \dots, n\}$ .

$M$  ist Falle  $\Leftrightarrow$  Alle  $p_{ik}$  mit  $i \in M, k \notin M$  sind 0.

$\Leftrightarrow$  Jede  $i$ -te Zeile mit  $i \in M$  enthält außerhalb aller  $j$ -ten Spalten,  $j \in M$ , nur Nullen.

Permutiert man bei Existenz einer Falle  $M$  die Zustandsnummern so, dass  $M = \{1, \dots, m\}$ , dann hat die Matrix die Form unten links. Umgekehrt zeigt die Matrix, dass  $M = \{1, \dots, m\}$  eine Falle ist. Beschränkt man sich in der Matrix auf die Indizes  $1, \dots, m$  der Falle, so ist diese Falle genau dann *minimal*, wenn ihre  $m \times m$ -Matrix nicht ihrerseits ggf. durch Umnummerieren in die entsprechende Form mit einer echten Unter-Falle  $M' = \{1, \dots, m'\}$  gebracht werden kann, wie im Bild unten rechts.

$$\begin{array}{c} m \\ \downarrow \\ m \rightarrow \begin{pmatrix} \times & \times & \times & 0 & \dots & 0 \\ \times & \times & \times & \vdots & \ddots & \vdots \\ \times & \times & \times & 0 & \dots & 0 \\ \times & \times & \times & \times & \times & \times \\ \times & \times & \times & \times & \times & \times \\ \times & \times & \times & \times & \times & \times \end{pmatrix} \end{array} \quad \begin{array}{c} m' \quad m \\ \downarrow \quad \downarrow \\ m' \rightarrow \quad m \rightarrow \begin{pmatrix} \times & \times & 0 & 0 & \dots & 0 \\ \times & \times & 0 & \vdots & \ddots & \vdots \\ \times & \times & \times & 0 & \dots & 0 \\ \times & \times & \times & \times & \times & \times \\ \times & \times & \times & \times & \times & \times \\ \times & \times & \times & \times & \times & \times \end{pmatrix} \end{array}$$



### 8.29 Erwartungswert in einer absorbierenden Markow-Kette

- a) Wir nummerieren die Ecken so, dass der Käfer auf 1 und der Vogel auf 3 sitzt, vgl. Abb. unten. Dann lautet die  $\ddot{U}$ -Matrix wie unten rechts:

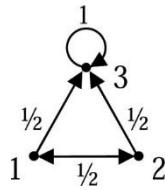

$$\begin{array}{ccc} 0 & 1/2 & 1/2 \\ 1/2 & 0 & 1/2 \\ 0 & 0 & 1 \end{array}$$

- b) Das System als Baum:

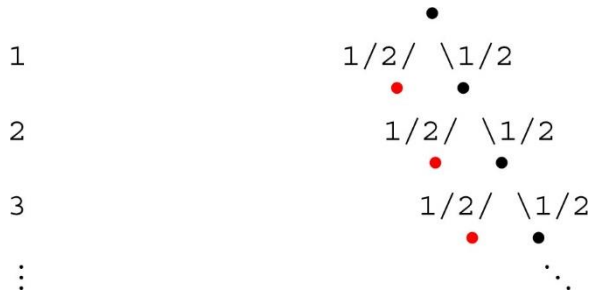

Lebenserwartungswert:  $\frac{1}{2} \cdot 1 + \frac{1}{4} \cdot 2 + \frac{1}{8} \cdot 3 + \dots = \sum_{n=1}^{\infty} \frac{n}{2^n}$

Das ergibt welche konkrete Zahl ... bzw.  $\infty$ ?

### Grenzwert mit Methoden der Analysis:

Ist  $|x| < 1$  und  $f(x) := \sum_{n=1}^{\infty} x^n$  so gilt  $f(x) = \frac{x}{1-x}$  und daher

$$f'(x) := \sum_{n=1}^{\infty} nx^{n-1} = \frac{1}{(1-x)^2}, \text{ also auch } \sum_{n=1}^{\infty} nx^n = x \cdot f'(x) = \frac{x}{(1-x)^2},$$

was für  $x = 1/2$  liefert:

Lebenserwartungswert:  $\sum_{n=1}^{\infty} \frac{n}{2^n} = \frac{1/2}{(1-(1/2))^2} = 2.$

Grenzwert durch Zerlegung in eine Reihe von Reihen:

$$= \begin{array}{cccccccl} 1/2 & + & 2/4 & + & 3/8 & + & 4/16 & + & \dots \\ 1/2 & + & 1/4 & + & 1/8 & + & 1/16 & + & \dots & (= 1) \\ & + & 1/4 & + & 1/8 & + & 1/16 & + & \dots & (= 1/2) \\ & & & + & 1/8 & + & 1/16 & + & \dots & (= 1/4) \\ & & & & & + & 1/16 & + & \dots & (= 1/8) \\ & & & & & + & & & \dots\dots\dots & \end{array}$$

---

$\sum = 2$

### 8.30 Zufallswege und Zufallsmaschinen

- a) Ann macht es perfekt: Sie erzeugt immer vier gleichverteilte Möglichkeiten (Laplace-Verteilung).

Ben spart etwas Arbeit, muss aber in Kauf nehmen, dass nach vorher gezogenen Karten die Alternativen i.A. nicht mehr genau gleichverteilt sind, sondern nur noch annähernd.

Celine liegt ganz schief: sie kommt nach 32 Schritten immer haargenau auf den Nullpunkt, anstatt glockenförmig verteilt auf ca. 1000 verschiedene Stellen.

- b)

|   |   |   |   |   |   |   |
|---|---|---|---|---|---|---|
|   |   |   | 1 |   |   |   |
|   |   | 3 |   | 3 |   |   |
|   | 3 |   | 9 |   | 3 |   |
| 1 |   | 9 | • | 9 |   | 1 |
|   | 3 |   | 9 |   | 3 |   |
|   |   | 3 |   | 3 |   |   |
|   |   |   | 1 |   |   |   |

alle Werte geteilt durch 64

Für den Erwartungswert genügt ein „repräsentativer Quadrant“ (schattiert), da sich in allen Quadranten (Grenzen fett) die Häufigkeiten und Abstände wiederholen.

Der durchschnittliche/erwartete Abstand (nach 3 Schritten) ist dort

$$(9 \cdot 1 + 1 \cdot 3 + 3 \cdot \sqrt{5} + 3 \cdot \sqrt{5})/16 \approx 1,5885.$$

### 8.31 Zufallswege mit Tendenzen

- a) Richtig ist (ii): Betrachten wir einmal das Erreichen eines Wegs, der irgendwann (und ab dann zwangsläufig immer) mit Anns Weg übereinstimmt, als Erfolg. Ann's Wegstellen liegen durchschnittlich alle 3,5 Stellen.

Nach jedem seiner Schritte hat Ben eine  $1/3,5$ -Chance, auf Anns Weg zu landen. Seine Misserfolgswahrscheinlichkeit ist  $1 - 1/3,5 = 5/7$ . Ben macht, sagen wir, ca. 29 Schritte, und die Misserfolgswahrscheinlichkeit (für eine andere Endstelle als die von Ann), grob geschätzt also  $(5/7)^{29}$ , ist kleiner als 1%, denn  $1,4^3 > 2$  und  $2^{10} > 1000$ .

Das Phänomen ist als *Würfelschlange* bekannt.

[ Das Erreichen eines gemeinsamen Endpunktes *kann zwingend* sein, denn wenn beispielsweise in der Würfelstrecke 6 5 4 3 2 1 4 vorkommt, landet garantiert jeder auf der hinteren 4, und ab dann laufen alle über dieselben Würfel. Es ist jedoch *nicht immer zwingend*, denn wenn z.B. der Weg aus 100 Sechsen besteht, beginnen (und enden) zwei Experimente mit  $5/6$  Wahrscheinlichkeit auf unterschiedlichen Stellen der Folge. ]

- b) Prinzipiell haben die beiden Würfelschlange-Spiele Entscheidendes gemeinsam:
- Ab dem Moment, wo zwei Wege einmal zusammentreffen, fallen sie dauerhaft zusammen (verschmelzen sie).
  - Es gibt bei jedem Schritt eines Weges eine Wahrscheinlichkeit  $\geq \text{const.} > 0$ , dass er ab dann auf den gleichen Punkt führt wie ein bislang anderer Weg.  
So wird in 5.1.2.4 6. vom ersten, zweiten und dritten Zwischenraum (gekennzeichnet durch Punkte) aus derselbe Zwischenraum (fetter Punkt) betreten.

Deswegen werden auch beim zweiten Spiel bei langen Schlangen zwei zufällig begonnene Wege gegen Ende mit großer Wahrscheinlichkeit übereinstimmen. Anders verlaufen allerdings konkrete Abschätzungen wie die der

- Verschmelzungswahrscheinlichkeit zweier Wege mit erwürfeltem Anfangspunkt über eine Schlange von hundert zufällig geworfenen Würfeln; man müsste notfalls die  $6^{102}$  gleich wahrscheinlichen Möglichkeiten (100 Würfe für die Schlange, 2 Würfe für die zwei Startpunkte) auf Verschmelzung prüfen, wenn einem kein kürzerer Rechenweg einfällt;
- Mindestlänge der Würfelschlange, damit zu mindestens 99% Wahrscheinlichkeit zwei Zufallswege am Ende verschmelzen; hier könnte man zur Not für Wege zunehmender Länge die  $6^8, 6^9, 6^{10}$  usw. Fälle analysieren, bis ab einem Exponenten die 99% erreicht sind.
